# Supplementary material for: Biogeographic patterns of polyploidy in the spleenwort: bridging divergent perspectives over the evolutionary consequences of polyploidy
Source: Research Square preprint supplement (doi:10.21203/rs.3.rs-3385605/v1), 2023-10-13
Supplement: Supplementary file 1 [file 9e85d217c558729cde0090bf.xlsx]

## Sheet: S1
Supplementary Data 1. Georeferenced occurrence data after cleaning and rarefaction
Species	decimalLongitude	decimalLatitude	Elevation(m)	Isolation from WB(km)
Asplenium_abscissum	-39.5233	-15.1542	231	51.9211
Asplenium_abscissum	-39.5833	-15.5833	242	35.6798
Asplenium_abscissum	-42.5986	-22.4219	703	49.7503
Asplenium_abscissum	-43.9589	-19.5608	719	5.1002
Asplenium_abscissum	-45.6191	-20.4314	780	28.7927
Asplenium_abscissum	-45.6703	-20.265	695	11.566
Asplenium_abscissum	-46.57	-21.78	1328	9.3999
Asplenium_abscissum	-46.8	-21.93	700	34.9555
Asplenium_abscissum	-47.3083	-24.0092	527	44.8252
Asplenium_abscissum	-47.9167	-24.2	140	18.6745
Asplenium_abscissum	-48.3633	-24.3075	852	22.8102
Asplenium_abscissum	-48.3911	-24.6294	496	3.3421
Asplenium_abscissum	-48.4472	-24.2736	874	26.7454
Asplenium_abscissum	-48.5333	-24.6667	453	8.3414
Asplenium_abscissum	-48.6931	-24.5389	367	10.9848
Asplenium_abscissum	-48.7022	-26.2006	181	3.421
Asplenium_abscissum	-48.7622	-24.8822	923	18.7196
Asplenium_abscissum	-48.7622	-24.7656	413	7.1292
Asplenium_abscissum	-48.775	-25.325	88	4.1939
Asplenium_abscissum	-48.925	-27.8408	813	30.4731
Asplenium_abscissum	-48.96	-26.6344	350	27.8067
Asplenium_abscissum	-49.0494	-27.09	194	44.2512
Asplenium_abscissum	-49.1181	-27.0069	309	49.7795
Asplenium_abscissum	-49.1644	-27.9942	335	44.3453
Asplenium_abscissum	-49.2333	-26.4167	211	44.922
Asplenium_abscissum	-49.2336	-27.63	813	58.6419
Asplenium_abscissum	-49.2917	-28.3594	137	41.7861
Asplenium_abscissum	-49.5851	-26.7275	828	89.3202
Asplenium_abscissum	-49.5886	-26.9119	829	92.6684
Asplenium_abscissum	-49.5894	-26.9981	518	94.8842
Asplenium_abscissum	-49.7333	-22.8167	504	24.7589
Asplenium_abscissum	-49.77	-28.71	458	20.1361
Asplenium_abscissum	-49.77	-26.8217	689	109.262
Asplenium_abscissum	-49.7708	-27.2703	474	114.22
Asplenium_abscissum	-49.8622	-27.4508	593	99.9112
Asplenium_abscissum	-49.8989	-6.31278	687	91.5609
Asplenium_abscissum	-50	-25.2333	889	24.087
Asplenium_abscissum	-50.1292	-26.9086	694	131.836
Asplenium_abscissum	-50.1308	-27.1803	639	112.887
Asplenium_abscissum	-50.3175	-6.98472	342	107.425
Asplenium_abscissum	-50.4	-26.64	1014	136.324
Asplenium_abscissum	-50.5342	-24.3369	802	78.0072
Asplenium_abscissum	-50.7069	-24.1006	681	75.4665
Asplenium_abscissum	-51.1477	-29.7645	10	27.0425
Asplenium_abscissum	-51.9789	-23.9158	370	6.1061
Asplenium_abscissum	-53.2	3.62	224	78.9622
Asplenium_abscissum	-53.28	4.1704	192	90.0516
Asplenium_abscissum	-53.3	3.58	401	69.0276
Asplenium_abscissum	-53.35	4.6	442	89.5449
Asplenium_abscissum	-53.8575	-25.2408	519	57.7155
Asplenium_abscissum	-53.9	-27.15	218	0.2068
Asplenium_abscissum	-53.9644	4.71639	205	47.1751
Asplenium_abscissum	-55.1667	4.95	306	16.6902
Asplenium_abscissum	-56.7111	-21.16	521	51.9367
Asplenium_abscissum	-58.53	3.13	501	22.4347
Asplenium_abscissum	-58.7017	4.7364	61	1.4708
Asplenium_abscissum	-59.2383	1.565	388	44.7961
Asplenium_abscissum	-60.4861	-13.1165	387	39.4207
Asplenium_abscissum	-60.577	-13.0887	443	40.8549
Asplenium_abscissum	-60.7163	-13.2616	245	34.768
Asplenium_abscissum	-61.1966	10.4681	234	15.5303
Asplenium_abscissum	-61.2	10.6	39	16.4915
Asplenium_abscissum	-61.3167	15.35	955	6.1781
Asplenium_abscissum	-61.3888	10.6524	67	10.1426
Asplenium_abscissum	-61.4045	10.729	446	3.9541
Asplenium_abscissum	-61.5477	10.2279	7	1.1245
Asplenium_abscissum	-62.77	-15.68	371	48.0429
Asplenium_abscissum	-63.47	-17.9	1084	65.2766
Asplenium_abscissum	-63.91	-19.53	1909	35.9826
Asplenium_abscissum	-63.91	-18.07	2048	44.8601
Asplenium_abscissum	-64.09	-19.81	1526	56.5691
Asplenium_abscissum	-64.35	-20.78	1545	14.4178
Asplenium_abscissum	-64.37	-22.44	1355	11.5249
Asplenium_abscissum	-64.42	-22.16	1143	16.2979
Asplenium_abscissum	-64.44	-22.04	1074	22.7112
Asplenium_abscissum	-64.5394	-22.0227	1614	13.316
Asplenium_abscissum	-66.17	-16.74	1391	58.8617
Asplenium_abscissum	-66.67	18.32	136	17.3198
Asplenium_abscissum	-67.08	-14.25	170	42.3823
Asplenium_abscissum	-67.17	-15	573	42.4019
Asplenium_abscissum	-67.22	10.43	1947	11.864
Asplenium_abscissum	-67.67	10.18	407	23.4206
Asplenium_abscissum	-67.69	10.35	1316	15.2178
Asplenium_abscissum	-67.9	-14.17	900	36.4365
Asplenium_abscissum	-68.01	-14.37	773	44.3503
Asplenium_abscissum	-68.48	-15.03	992	71.8874
Asplenium_abscissum	-68.71	-14.67	1320	100.855
Asplenium_abscissum	-68.7408	-14.1642	1549	118.429
Asplenium_abscissum	-68.79	-14.58	1105	111.584
Asplenium_abscissum	-68.93	-14.6	1896	123.928
Asplenium_abscissum	-68.95	-14.75	2136	121.727
Asplenium_abscissum	-69.02	18.92	144	6.7008
Asplenium_abscissum	-69.0708	-14.8194	3686	132.363
Asplenium_abscissum	-69.15	18.92	409	9.2494
Asplenium_abscissum	-69.15	18.82	147	18.4213
Asplenium_abscissum	-69.48	19.07	68	1.9519
Asplenium_abscissum	-69.5	19	184	9.2116
Asplenium_abscissum	-69.5083	19.3	97	3.2051
Asplenium_abscissum	-69.63	19.08	50	2.3267
Asplenium_abscissum	-69.7492	9.0414	165	93.672
Asplenium_abscissum	-69.92	19.23	66	15.5714
Asplenium_abscissum	-70.22	18.58	377	26.067
Asplenium_abscissum	-70.25	-12	379	56.0172
Asplenium_abscissum	-70.3734	19.3641	161	30.2016
Asplenium_abscissum	-70.44	18.52	1122	19.3186
Asplenium_abscissum	-70.5	19.05	1034	20.536
Asplenium_abscissum	-71.0709	18.0732		2.4452
Asplenium_abscissum	-71.17	-11.75	430	19.2634
Asplenium_abscissum	-71.25	-12.64	453	49.189
Asplenium_abscissum	-71.52	18.2	1787	26.6196
Asplenium_abscissum	-71.53	19.25	682	45.5155
Asplenium_abscissum	-71.758	18.155	310	9.2908
Asplenium_abscissum	-72.6419	5.235	713	88.3639
Asplenium_abscissum	-73.2175	8.60611	430	1.6163
Asplenium_abscissum	-74.4	18.37	420	4.1201
Asplenium_abscissum	-74.4609	20.3005	79	4.2193
Asplenium_abscissum	-74.5731	20.3489	417	5.9378
Asplenium_abscissum	-74.6189	20.1711	928	11.6593
Asplenium_abscissum	-74.7517	20.3908	349	15.8426
Asplenium_abscissum	-74.7953	20.2797	689	23.8181
Asplenium_abscissum	-74.8433	20.4803	873	13.9202
Asplenium_abscissum	-74.95	20.63	61	3.9502
Asplenium_abscissum	-75.2578	20.3589	443	30.9947
Asplenium_abscissum	-75.4886	-10.4028	2138	75.3182
Asplenium_abscissum	-75.4936	20.5169	648	17.6531
Asplenium_abscissum	-75.5731	19.9836	975	8.691
Asplenium_abscissum	-75.7519	20.0553	93	9.5629
Asplenium_abscissum	-75.8219	20.4172	400	29.4826
Asplenium_abscissum	-76.02	-9.32055	709	5.1719
Asplenium_abscissum	-76.3897	20.1803	657	21.5284
Asplenium_abscissum	-76.5364	20.0439	1342	9.9105
Asplenium_abscissum	-76.65	18.0833	1477	14.375
Asplenium_abscissum	-76.7262	20.0354	1097	8.9955
Asplenium_abscissum	-76.8333	19.9667	707	3.2297
Asplenium_abscissum	-76.8333	-7	866	18.7281
Asplenium_abscissum	-77.533	-6.95	1846	43.8821
Asplenium_abscissum	-77.75	-5.83	2909	75.9347
Asplenium_abscissum	-77.7844	21.6103	174	19.3649
Asplenium_abscissum	-78.13	-2.38	856	54.5383
Asplenium_abscissum	-78.35	-5.55	2292	17.2369
Asplenium_abscissum	-78.566	-3.4	1165	101.789
Asplenium_abscissum	-78.6	-5.6167	386	1.1155
Asplenium_abscissum	-78.6667	-4.36666	916	51.9365
Asplenium_abscissum	-78.78	0.23	984	70.1178
Asplenium_abscissum	-78.9	0.8	62	33.2585
Asplenium_abscissum	-79.07	-5.98	1813	33.5741
Asplenium_abscissum	-79.5865	21.8579	661	17.8153
Asplenium_abscissum	-79.7	9.14	125	3.024
Asplenium_abscissum	-79.79	9.2	117	4.3189
Asplenium_abscissum	-79.85	-3.866	896	32.9644
Asplenium_abscissum	-80.0122	21.8894	785	9.0953
Asplenium_abscissum	-80.0288	22.0082	742	19.422
Asplenium_abscissum	-80.12	8.6	593	21.2455
Asplenium_abscissum	-80.71	7.3	1235	8.1566
Asplenium_abscissum	-81.13	8.53	658	18.3418
Asplenium_abscissum	-81.8167	28.35	38	68.8869
Asplenium_abscissum	-81.9167	29.0333	19	40.1029
Asplenium_abscissum	-82.1956	28.7051	27	43.6414
Asplenium_abscissum	-82.3482	29.6654	34	56.6692
Asplenium_abscissum	-82.3879	28.5553	63	26.1942
Asplenium_abscissum	-82.4759	29.6547	29	45.3389
Asplenium_abscissum	-82.4876	28.8516	18	14.5079
Asplenium_abscissum	-82.57	8.87	1925	34.4667
Asplenium_abscissum	-82.77	8.98	2066	47.0334
Asplenium_abscissum	-82.78	9.94		17.3686
Asplenium_abscissum	-82.83	8.92	1369	43.6872
Asplenium_abscissum	-82.9483	22.858	205	11.5984
Asplenium_abscissum	-82.9627	8.784	1147	24.7079
Asplenium_abscissum	-82.98	9.22	1854	48.7485
Asplenium_abscissum	-83.0534	22.8178	384	15.8797
Asplenium_abscissum	-83.0666	9.1388	2041	49.392
Asplenium_abscissum	-83.1899	22.7249	452	20.6242
Asplenium_abscissum	-83.2333	9.35833	1887	33.2418
Asplenium_abscissum	-83.3417	9.78333	991	1.9293
Asplenium_abscissum	-83.5124	22.7014	278	14.2354
Asplenium_abscissum	-83.65	9.88	596	28.2853
Asplenium_abscissum	-83.76	9.29	1050	9.3138
Asplenium_abscissum	-83.7705	22.6179	431	14.514
Asplenium_abscissum	-83.8	9.87	1167	40.9099
Asplenium_abscissum	-83.83	9.53111	1919	25.1535
Asplenium_abscissum	-84	10.43	56	29.4144
Asplenium_abscissum	-84	10.04	1495	61.1595
Asplenium_abscissum	-84.05	9.83333	1776	40.0941
Asplenium_abscissum	-84.13	9.55	421	11.5572
Asplenium_abscissum	-84.17	10.26	847	51.0925
Asplenium_abscissum	-84.17	9.84	1585	37.1984
Asplenium_abscissum	-84.2653	9.92222	704	39.4508
Asplenium_abscissum	-84.47	9.79	1461	16.2281
Asplenium_abscissum	-84.56	9.75	508	7.4173
Asplenium_abscissum	-84.8131	10.3039	1381	27.4346
Asplenium_abscissum	-84.88	10.46	866	35.6043
Asplenium_abscissum	-84.9056	10.3806	856	27.7627
Asplenium_abscissum	-84.99	13.73	837	59.8531
Asplenium_abscissum	-85.06	10.66	591	44.1829
Asplenium_abscissum	-85.0667	30.7	54	15.7989
Asplenium_abscissum	-85.0764	10.7514	574	42.6903
Asplenium_abscissum	-85.17	14.26	194	5.4096
Asplenium_abscissum	-85.25	12.98	1163	24.0417
Asplenium_abscissum	-85.26	10.8	779	40.5589
Asplenium_abscissum	-85.32	12.3	466	23.0361
Asplenium_abscissum	-85.4017	10.8829	657	28.342
Asplenium_abscissum	-85.4278	10.9906	734	24.475
Asplenium_abscissum	-85.4939	10.9272	501	20.5359
Asplenium_abscissum	-85.52	11.45	871	20.833
Asplenium_abscissum	-85.64	13.23	750	36.8785
Asplenium_abscissum	-85.71	13.27	1238	29.1878
Asplenium_abscissum	-85.78	15.42	431	51.5742
Asplenium_abscissum	-85.87	12.98	1173	22.2872
Asplenium_abscissum	-85.93	13.05	1360	23.0294
Asplenium_abscissum	-85.97	11.85	462	23.5149
Asplenium_abscissum	-86.27	13.27	1366	19.4507
Asplenium_abscissum	-86.9	13.93	1760	47.9257
Asplenium_abscissum	-87.07	5.52	295	0.6687
Asplenium_abscissum	-87.07	14.13	1408	72.1224
Asplenium_abscissum	-87.08	14.03	1765	63.3992
Asplenium_abscissum	-87.1667	14.25	959	70.0443
Asplenium_abscissum	-88.18	14.33	1792	23.1494
Asplenium_abscissum	-88.23	15.15	249	4.2244
Asplenium_abscissum	-88.59	16.85	177	29.8812
Asplenium_abscissum	-88.5958	16.5319	55	18.3122
Asplenium_abscissum	-88.97	16.47	494	33.225
Asplenium_abscissum	-89.09	16.56	598	48.088
Asplenium_abscissum	-89.2942	13.7486	1563	26.1081
Asplenium_abscissum	-89.35	14.4	1870	11.7643
Asplenium_abscissum	-89.45	16.12	285	53.9804
Asplenium_abscissum	-89.68	13.83	993	28.0302
Asplenium_abscissum	-89.7	13.7	229	16.6502
Asplenium_abscissum	-89.7986	13.8747	1498	25.8211
Asplenium_abscissum	-89.9333	13.8167	654	14.6706
Asplenium_abscissum	-90.9694	16.901	128	0.0224
Asplenium_abscissum	-91.0839	16.1208	169	35.4147
Asplenium_abscissum	-91.0917	16.7417	337	16.4195
Asplenium_abscissum	-91.66	16.08	1515	52.3557
Asplenium_abscissum	-91.7528	16.0986	1504	44.477
Asplenium_abscissum	-91.9822	17.5092	67	33.6219
Asplenium_abscissum	-92.1097	16.9578	943	72.2952
Asplenium_abscissum	-92.175	15.0847	1203	34.6135
Asplenium_abscissum	-92.3028	15.5075	2154	17.1745
Asplenium_abscissum	-92.5083	17.6417	165	48.3669
Asplenium_abscissum	-92.775	15.675	1922	44.05
Asplenium_abscissum	-92.8	15.6167	1624	37.8241
Asplenium_abscissum	-92.82	16.98	2165	28.3188
Asplenium_abscissum	-92.9	17.4208	446	49.1043
Asplenium_abscissum	-92.9436	15.7228	1616	34.5343
Asplenium_abscissum	-93.08	15.75	2178	28.5293
Asplenium_abscissum	-93.1894	15.8486	1116	29.2857
Asplenium_abscissum	-93.2331	16.9042	854	11.5685
Asplenium_abscissum	-93.2917	15.9417	1738	30.0256
Asplenium_abscissum	-93.4503	16.8864	945	16.7153
Asplenium_abscissum	-93.4611	16.9508	610	11.5117
Asplenium_abscissum	-93.4764	17.0303	626	6.2205
Asplenium_abscissum	-93.61	16.2	2072	30.0385
Asplenium_abscissum	-93.6117	16.0867	932	23.1719
Asplenium_abscissum	-93.68	16.9589	868	21.5538
Asplenium_abscissum	-93.7169	16.7169	652	45.4887
Asplenium_abscissum	-93.7439	16.7986	754	38.8004
Asplenium_abscissum	-94.0819	16.5667	1270	34.5257
Asplenium_abscissum	-94.1189	16.8858	1300	58.5717
Asplenium_abscissum	-94.17	16.73	1452	48.171
Asplenium_abscissum	-94.18	16.55	1370	32.0709
Asplenium_abscissum	-94.38	17.325	102	39.3478
Asplenium_abscissum	-94.55	17.45	56	18.4021
Asplenium_abscissum	-94.57	16.92	269	44.4132
Asplenium_abscissum	-94.68	16.86	266	40.7063
Asplenium_abscissum	-94.7	17.167	145	20.7295
Asplenium_abscissum	-95.117	18.567	648	7.3295
Asplenium_abscissum	-95.5	16.717	1575	60.8522
Asplenium_abscissum	-96.0833	17.4167	1793	72.4511
Asplenium_abscissum	-96.25	18.4167	37	14.208
Asplenium_abscissum	-96.3283	17.7136	359	46.6547
Asplenium_abscissum	-96.3493	17.6279	1436	55.3912
Asplenium_abscissum	-96.3961	18.0663	116	16.902
Asplenium_abscissum	-96.4587	15.966	1036	27.1576
Asplenium_abscissum	-96.5606	17.6581	2271	50.5536
Asplenium_abscissum	-96.9417	19.62	1471	53.1407
Asplenium_abscissum	-97.0142	18.8865	975	85.0317
Asplenium_abscissum	-97.2567	19.8969	799	59.1668
Asplenium_abscissum	-98.6107	21.0203	1205	28.839
Asplenium_abscissum	-99.2806	18.9799	2040	32.6737
Asplenium_abscissum	-104.418	19.6915	983	55.1731
Asplenium_actiniopteroides	39.6333	11.1167	2593	83.0431
Asplenium_actiniopteroides	37.65	0.05	1658	48.3264
Asplenium_actiniopteroides	36.73	-3.23	3202	50.9176
Asplenium_actiniopteroides	36.7	-2.73333	1360	86.1923
Asplenium_actiniopteroides	29.6894	-1.3825	3485	21.1676
Asplenium_actiniopteroides	29.6	-1.4	3080	19.5176
Asplenium_actiniopteroides	29.4667	-1.6	2682	37.0381
Asplenium_actiniopteroides	29.4167	-1.46667	3744	24.8588
Asplenium_acuminatum	-78.1484	0.3485	2202	15.3586
Asplenium_acuminatum	-78.6167	-0.166667	3752	78.3734
Asplenium_acuminatum	-83.7407	9.55383	2955	22.6971
Asplenium_acuminatum	-83.7922	9.71222	1833	31.6638
Asplenium_acuminatum	-92.1457	15.1439	2115	28.0983
Asplenium_acuminatum	-96.5072	17.5761	2885	48.9887
Asplenium_acuminatum	-96.5808	17.6883	2552	51.3853
Asplenium_acuminatum	-140.17	-8.87	899	5.6553
Asplenium_acuminatum	-155.62	20.13	434	1.2594
Asplenium_acuminatum	-156.065	20.4505		18.5546
Asplenium_acuminatum	-156.233	20.8	1388	9.273
Asplenium_acuminatum	-156.27	20.8	1256	11.9657
Asplenium_acuminatum	-156.345	20.7896	553	11.5954
Asplenium_acuminatum	-156.517	21.0833		8.3741
Asplenium_acuminatum	-156.55	20.85	781	5.9539
Asplenium_acuminatum	-156.6	19.9		56.5605
Asplenium_acuminatum	-156.607	20.9275	976	8.2887
Asplenium_acuminatum	-156.881	21.1564	94	0.9291
Asplenium_acuminatum	-156.9	21.1183	1220	4.7011
Asplenium_acuminatum	-156.994	21.1338	407	4.919
Asplenium_acuminatum	-157.023	21.1444	302	3.993
Asplenium_acuminatum	-157.8	21.3	201	3.8217
Asplenium_acuminatum	-159.568	22.0906	1209	11.8792
Asplenium_acuminatum	-159.582	22.1124	1129	9.3258
Asplenium_adiantum-nigrum	121.333	24.1833	2191	29.4009
Asplenium_adiantum-nigrum	121.3	24.3333	1685	38.7306
Asplenium_adiantum-nigrum	121.3	24.4	2104	41.7695
Asplenium_adiantum-nigrum	121.262	24.1342	2815	34.9937
Asplenium_adiantum-nigrum	121.236	24.0475	2244	37.2817
Asplenium_adiantum-nigrum	121.233	24.2667	1529	41.7916
Asplenium_adiantum-nigrum	120.962	23.7511	1890	56.7098
Asplenium_adiantum-nigrum	120.933	23.5667	1548	56.1053
Asplenium_adiantum-nigrum	120.883	23.4667	2709	56.6432
Asplenium_adiantum-nigrum	120.783	23.5	1884	62.5847
Asplenium_adiantum-nigrum	109.47	30.3	431	68.7713
Asplenium_adiantum-nigrum	99.2872	27.1772	2278	12.3343
Asplenium_adiantum-nigrum	98.8658	26.8683	1507	1.5474
Asplenium_adiantum-nigrum	74.43	34.9192	2805	49.9188
Asplenium_adiantum-nigrum	74.1853	34.8052	2030	55.1392
Asplenium_adiantum-nigrum	73.9535	33.9215	2437	18.4437
Asplenium_adiantum-nigrum	71.3	35.48	1614	125.769
Asplenium_adiantum-nigrum	65.3879	28.7036	795	234.119
Asplenium_adiantum-nigrum	55.4525	-21.1311	996	15.6371
Asplenium_adiantum-nigrum	54.4667	36.7833	579	43.8088
Asplenium_adiantum-nigrum	48.9869	37.3069	970	34.7041
Asplenium_adiantum-nigrum	48.8719	38.4289	-23	0.2505
Asplenium_adiantum-nigrum	48.7886	38.6686	52	7.7538
Asplenium_adiantum-nigrum	48.67	38.63	891	19.7422
Asplenium_adiantum-nigrum	48.6	38.7333	567	24.9292
Asplenium_adiantum-nigrum	46.53	39.06	700	13.4944
Asplenium_adiantum-nigrum	46.4636	39.1408	1079	22.9921
Asplenium_adiantum-nigrum	46.2903	41.8522	687	89.9717
Asplenium_adiantum-nigrum	45.9214	41.6142	799	53.8217
Asplenium_adiantum-nigrum	44.5305	42.3417	1667	43.8819
Asplenium_adiantum-nigrum	44.05	13.5333	2797	75.6631
Asplenium_adiantum-nigrum	43.6152	42.4099	1187	38.454
Asplenium_adiantum-nigrum	42.8	42.5333	448	87.5499
Asplenium_adiantum-nigrum	42.2839	42.5852	323	69.0478
Asplenium_adiantum-nigrum	41.908	43.78	1035	1.1024
Asplenium_adiantum-nigrum	41.7147	41.6639	149	3.2923
Asplenium_adiantum-nigrum	41.6667	9.41667	2438	125.177
Asplenium_adiantum-nigrum	41.553	43.299	2038	45.0585
Asplenium_adiantum-nigrum	41.5525	41.3828	632	11.8866
Asplenium_adiantum-nigrum	40.9547	43.9408	971	87.3691
Asplenium_adiantum-nigrum	40.875	43.783	1136	70.4849
Asplenium_adiantum-nigrum	40.8206	43.0881	70	1.4179
Asplenium_adiantum-nigrum	40.55	43.48	972	35.0044
Asplenium_adiantum-nigrum	40.4375	43.6503	1823	39.6756
Asplenium_adiantum-nigrum	40.4173	43.7631	1834	48.6291
Asplenium_adiantum-nigrum	40.2031	43.6791	531	32.9892
Asplenium_adiantum-nigrum	40.0396	43.605	464	20.2766
Asplenium_adiantum-nigrum	39.95	43.43	19	2.8223
Asplenium_adiantum-nigrum	39.8727	43.5381	271	3.7751
Asplenium_adiantum-nigrum	39.7533	6.775	3410	51.9737
Asplenium_adiantum-nigrum	39.7037	43.7356	292	11.6331
Asplenium_adiantum-nigrum	39.6667	9.75	3110	55.94
Asplenium_adiantum-nigrum	39.469	43.8	39	2.7902
Asplenium_adiantum-nigrum	39.3552	44.3243	258	38.0698
Asplenium_adiantum-nigrum	39.311	43.952	110	3.8459
Asplenium_adiantum-nigrum	39.1505	44.0408	63	3.2308
Asplenium_adiantum-nigrum	39.0424	44.108	104	1.8939
Asplenium_adiantum-nigrum	38.35	-30.48		624.129
Asplenium_adiantum-nigrum	38.3	-3.41667	1812	92.1726
Asplenium_adiantum-nigrum	38.2308	44.5375	234	11.9185
Asplenium_adiantum-nigrum	38.1	13.2833	3028	45.4421
Asplenium_adiantum-nigrum	37.5167	-3.18333	2690	38.1856
Asplenium_adiantum-nigrum	37.4044	-3.04631	4041	44.604
Asplenium_adiantum-nigrum	36.45	41.2	197	4.0437
Asplenium_adiantum-nigrum	36.0239	34.4394	392	10.3685
Asplenium_adiantum-nigrum	35.8	0.316667	2053	112.255
Asplenium_adiantum-nigrum	35.5167	0.05	2698	125.25
Asplenium_adiantum-nigrum	32.1308	41.2481	601	33.1321
Asplenium_adiantum-nigrum	32.077	41.0355	752	51.1187
Asplenium_adiantum-nigrum	31.1136	-25.8839	1143	106.953
Asplenium_adiantum-nigrum	30.875	-25.375	925	124.638
Asplenium_adiantum-nigrum	30.625	-25.125	2076	135.043
Asplenium_adiantum-nigrum	30.625	-24.875	1526	158.598
Asplenium_adiantum-nigrum	30.375	-27.125	1336	20.6384
Asplenium_adiantum-nigrum	30.375	-25.375	1184	103.654
Asplenium_adiantum-nigrum	30.0247	-27.3358	1938	36.3098
Asplenium_adiantum-nigrum	29.6675	-29.5086	1825	70.8214
Asplenium_adiantum-nigrum	29.4386	-29.1175	1512	37.9304
Asplenium_adiantum-nigrum	29.4036	-30.4794	1801	86.3166
Asplenium_adiantum-nigrum	29.125	-28.875	1822	17.0226
Asplenium_adiantum-nigrum	29.125	-29.875	2402	34.0368
Asplenium_adiantum-nigrum	29.125	-28.375	1704	25.5715
Asplenium_adiantum-nigrum	29.125	-28.625	1197	1.6109
Asplenium_adiantum-nigrum	29.125	-27.625	1813	58.177
Asplenium_adiantum-nigrum	29	-24	1225	12.4142
Asplenium_adiantum-nigrum	28.875	-29.375	2395	7.2442
Asplenium_adiantum-nigrum	28.8667	-26.5	1647	50.1018
Asplenium_adiantum-nigrum	28.625	-30.125	1962	8.7957
Asplenium_adiantum-nigrum	28.625	-28.875	2733	43.676
Asplenium_adiantum-nigrum	28.625	-28.375	1814	47.4464
Asplenium_adiantum-nigrum	28.375	-28.875	2026	28.4154
Asplenium_adiantum-nigrum	28.375	-29.625	2834	33.5643
Asplenium_adiantum-nigrum	28	-30.7	2391	44.2627
Asplenium_adiantum-nigrum	27.8797	-30.2519	1588	2.4437
Asplenium_adiantum-nigrum	27.875	-30.125	1518	1.9345
Asplenium_adiantum-nigrum	27.6592	-29.4883	1796	25.8764
Asplenium_adiantum-nigrum	27.625	-27.875	1474	99.2863
Asplenium_adiantum-nigrum	27.6225	-29.375	1552	14.8001
Asplenium_adiantum-nigrum	27.5159	41.9769	407	36.5393
Asplenium_adiantum-nigrum	27.4183	42.0456	338	38.5647
Asplenium_adiantum-nigrum	27.2667	-32.6833	1158	51.152
Asplenium_adiantum-nigrum	27.125	-30.625	1464	8.6809
Asplenium_adiantum-nigrum	27.125	-28.375	1406	81.9535
Asplenium_adiantum-nigrum	26.875	-29.125	1534	51.0401
Asplenium_adiantum-nigrum	26.8	39.7333	837	16.2818
Asplenium_adiantum-nigrum	26.625	-33.625	89	6.6197
Asplenium_adiantum-nigrum	26.6036	-31.2511	1931	57.1753
Asplenium_adiantum-nigrum	26.3783	-32.3589	1786	21.1924
Asplenium_adiantum-nigrum	26.3469	-32.0975	1755	8.1686
Asplenium_adiantum-nigrum	26.2053	-32.3425	1744	30.2686
Asplenium_adiantum-nigrum	26.1223	-31.3531	1737	70.7123
Asplenium_adiantum-nigrum	26.045	-31.205	1587	60.9419
Asplenium_adiantum-nigrum	25.8706	-32.4269	1518	62.9401
Asplenium_adiantum-nigrum	25.4833	37.0667	339	8.6658
Asplenium_adiantum-nigrum	25.3805	-31.1333	1478	52.7266
Asplenium_adiantum-nigrum	25.375	-33.875	231	13.3223
Asplenium_adiantum-nigrum	25.375	-32.125	1102	105.295
Asplenium_adiantum-nigrum	25.3461	-32.6589	1424	102.931
Asplenium_adiantum-nigrum	25.2447	-32.4675	1656	112.999
Asplenium_adiantum-nigrum	25.0253	-31.1378	1927	65.095
Asplenium_adiantum-nigrum	25.0138	-32.2549	1863	122.397
Asplenium_adiantum-nigrum	24.9964	41.3492	542	34.5121
Asplenium_adiantum-nigrum	24.9247	41.2525	411	27.1689
Asplenium_adiantum-nigrum	24.9214	-31.8842	1930	138.32
Asplenium_adiantum-nigrum	24.8867	-31.7064	1820	123.123
Asplenium_adiantum-nigrum	24.7769	41.2125	368	31.3758
Asplenium_adiantum-nigrum	24.5567	41.0789	587	12.4776
Asplenium_adiantum-nigrum	24.5228	41.2444	259	28.3374
Asplenium_adiantum-nigrum	24.4661	41.4158	534	45.5888
Asplenium_adiantum-nigrum	24.375	-34.125		1.9115
Asplenium_adiantum-nigrum	24.3236	-31.7544	1842	135.847
Asplenium_adiantum-nigrum	24.125	-34.125		7.2916
Asplenium_adiantum-nigrum	24.1122	45.7028	532	16.9247
Asplenium_adiantum-nigrum	24.05	41.3667	569	51.4982
Asplenium_adiantum-nigrum	24.0019	41.5733	980	64.9254
Asplenium_adiantum-nigrum	23.8903	-32.3519	1508	79.9657
Asplenium_adiantum-nigrum	23.8044	40.1067	167	1.6962
Asplenium_adiantum-nigrum	23.5394	38.6775	297	6.2458
Asplenium_adiantum-nigrum	23.4497	40.3853	639	10.6672
Asplenium_adiantum-nigrum	23.417	42.55	874	23.9887
Asplenium_adiantum-nigrum	23.3908	40.4925	444	21.4892
Asplenium_adiantum-nigrum	23.0792	48.1483	408	1.1582
Asplenium_adiantum-nigrum	23.0439	39.3739	414	4.5646
Asplenium_adiantum-nigrum	23.0297	41.0081	427	25.6575
Asplenium_adiantum-nigrum	22.9539	41.2431	127	19.9255
Asplenium_adiantum-nigrum	22.875	-34.125		5.6393
Asplenium_adiantum-nigrum	22.875	-33.875	511	13.8713
Asplenium_adiantum-nigrum	22.875	-32.375	898	16.4713
Asplenium_adiantum-nigrum	22.7872	39.8294	78	1.5439
Asplenium_adiantum-nigrum	22.7183	48.4421	123	32.6425
Asplenium_adiantum-nigrum	22.62	54.22	216	84.5039
Asplenium_adiantum-nigrum	22.6167	37.2333	1502	21.6895
Asplenium_adiantum-nigrum	22.6089	39.8911	107	10.0893
Asplenium_adiantum-nigrum	22.5956	-32.1422	1801	4.9661
Asplenium_adiantum-nigrum	22.5292	37.3547	981	23.2922
Asplenium_adiantum-nigrum	22.4683	40.1133	810	8.6867
Asplenium_adiantum-nigrum	22.4572	36.9297	512	18.9639
Asplenium_adiantum-nigrum	22.3833	36.9958	979	18.5902
Asplenium_adiantum-nigrum	22.375	-33.875	664	18.649
Asplenium_adiantum-nigrum	22.3508	37.0919	425	20.9944
Asplenium_adiantum-nigrum	22.2469	40.2839	1056	12.2221
Asplenium_adiantum-nigrum	22.1292	38.535	504	15.5342
Asplenium_adiantum-nigrum	22.085	40.2792	371	2.0095
Asplenium_adiantum-nigrum	22.0354	45.1397	1269	47.2814
Asplenium_adiantum-nigrum	21.9406	38.5206	642	11.0237
Asplenium_adiantum-nigrum	21.8833	41.0333	1753	65.2117
Asplenium_adiantum-nigrum	21.7311	38.4297	372	7.3371
Asplenium_adiantum-nigrum	21.6972	39.0064	712	52.9882
Asplenium_adiantum-nigrum	21.625	-33.625	444	7.9147
Asplenium_adiantum-nigrum	21.485	38.8	591	31.5466
Asplenium_adiantum-nigrum	21.3347	38.7167	65	22.0724
Asplenium_adiantum-nigrum	21.25	-32.455	1788	80.6239
Asplenium_adiantum-nigrum	21.125	-33.625	346	49.4028
Asplenium_adiantum-nigrum	21.0108	39.8286	1036	57.3528
Asplenium_adiantum-nigrum	20.9553	39.6425	583	54.4466
Asplenium_adiantum-nigrum	20.6994	39.8069	584	52.7893
Asplenium_adiantum-nigrum	20.625	-34.375	72	6.7437
Asplenium_adiantum-nigrum	20.6036	39.72	186	40.0087
Asplenium_adiantum-nigrum	20.2411	39.4917		0.0835
Asplenium_adiantum-nigrum	19.6972	39.6917	393	1.8253
Asplenium_adiantum-nigrum	19.6619	-33.3753	1851	45.6098
Asplenium_adiantum-nigrum	19.6433	42.3183	1324	23.4971
Asplenium_adiantum-nigrum	19.6069	-34.0497	272	47.6556
Asplenium_adiantum-nigrum	19.45	-34.55	356	7.1462
Asplenium_adiantum-nigrum	19.1553	42.0083	72	1.3022
Asplenium_adiantum-nigrum	18.875	-34.375		1.2481
Asplenium_adiantum-nigrum	18.875	-33.875	261	22.7245
Asplenium_adiantum-nigrum	18.55	57.5	42	21.1542
Asplenium_adiantum-nigrum	18.375	-34.125	8	3.5227
Asplenium_adiantum-nigrum	17.5839	46.4011	161	45.2698
Asplenium_adiantum-nigrum	17.2475	43.0117	57	0.8554
Asplenium_adiantum-nigrum	16.9839	58.6243		1.1667
Asplenium_adiantum-nigrum	16.625	48.325	163	18.4413
Asplenium_adiantum-nigrum	16.5683	49.3664	422	56.6387
Asplenium_adiantum-nigrum	15.965	46.7656	328	6.9998
Asplenium_adiantum-nigrum	15.9558	47.6814	457	68.1467
Asplenium_adiantum-nigrum	15.8897	46.8938	382	17.2836
Asplenium_adiantum-nigrum	15.8	47.2167	475	38.5689
Asplenium_adiantum-nigrum	15.4819	47.5849	865	26.1199
Asplenium_adiantum-nigrum	15.4608	46.7764	472	11.3331
Asplenium_adiantum-nigrum	15.4483	46.6569	514	7.4143
Asplenium_adiantum-nigrum	15.3826	47.1031	468	1.1171
Asplenium_adiantum-nigrum	15.375	47.375	810	3.74
Asplenium_adiantum-nigrum	15.31	46.6714	458	7.2616
Asplenium_adiantum-nigrum	15.2417	40.1006	372	0.5633
Asplenium_adiantum-nigrum	15.2036	46.825	536	20.7846
Asplenium_adiantum-nigrum	15.1828	47.0214	443	19.0028
Asplenium_adiantum-nigrum	15.125	-23.875	559	61.1317
Asplenium_adiantum-nigrum	14.9541	38.4645	22	0.6002
Asplenium_adiantum-nigrum	14.7666	44.7666	32	0.2419
Asplenium_adiantum-nigrum	13.75	47.6167	854	48.8141
Asplenium_adiantum-nigrum	13.596	45.515	20	0.0042
Asplenium_adiantum-nigrum	13.5417	47.725	760	56.3809
Asplenium_adiantum-nigrum	13.4167	37.85	1166	24.3866
Asplenium_adiantum-nigrum	13.3737	42.9737	517	47.0821
Asplenium_adiantum-nigrum	13.1206	43.0762	513	62.5173
Asplenium_adiantum-nigrum	12.787	42.7307	691	38.8082
Asplenium_adiantum-nigrum	12.5017	56.2961	62	0.3735
Asplenium_adiantum-nigrum	12.1114	57.3607	5	1.7388
Asplenium_adiantum-nigrum	12.0717	42.7958	259	15.682
Asplenium_adiantum-nigrum	11.9308	57.6918	19	1.2629
Asplenium_adiantum-nigrum	11.812	57.9423	9	4.7811
Asplenium_adiantum-nigrum	11.6126	57.9284	22	1.5156
Asplenium_adiantum-nigrum	11.61	46.7897	791	43.0106
Asplenium_adiantum-nigrum	11.266	46.483	337	2.3625
Asplenium_adiantum-nigrum	11.1457	42.4111	338	2.7826
Asplenium_adiantum-nigrum	11.012	46.8621	2041	19.1104
Asplenium_adiantum-nigrum	10.6291	43.3867	441	15.9543
Asplenium_adiantum-nigrum	9.95062	44.135	107	7.0897
Asplenium_adiantum-nigrum	9.81044	44.2337	408	12.7417
Asplenium_adiantum-nigrum	9.78	50.38	432	34.9768
Asplenium_adiantum-nigrum	9.77306	44.3786	1205	25.817
Asplenium_adiantum-nigrum	9.66491	44.2326	311	9.1237
Asplenium_adiantum-nigrum	9.54996	44.2524	522	4.7481
Asplenium_adiantum-nigrum	9.48108	44.3519	588	10.8123
Asplenium_adiantum-nigrum	9.48	49.84	297	4.4691
Asplenium_adiantum-nigrum	9.43333	42.35	1076	10.1708
Asplenium_adiantum-nigrum	9.4	42.8167	1046	6.427
Asplenium_adiantum-nigrum	9.37615	47.4174	733	17.4455
Asplenium_adiantum-nigrum	9.36667	42.5167	372	12.5711
Asplenium_adiantum-nigrum	9.31667	42.3833	1330	21.5744
Asplenium_adiantum-nigrum	9.27843	40.9045	524	22.6917
Asplenium_adiantum-nigrum	9.22596	40.24	633	39.8963
Asplenium_adiantum-nigrum	9.21667	41.8167	1547	18.0161
Asplenium_adiantum-nigrum	9.17107	4.20354	3607	18.0628
Asplenium_adiantum-nigrum	9.16667	42.3333	461	34.8849
Asplenium_adiantum-nigrum	9.11667	42.2167	1757	38.733
Asplenium_adiantum-nigrum	9.01784	45.928	1536	26.332
Asplenium_adiantum-nigrum	9.01667	41.7167	749	9.6517
Asplenium_adiantum-nigrum	8.98333	42.4	2015	24.1612
Asplenium_adiantum-nigrum	8.955	46.0361	509	14.8301
Asplenium_adiantum-nigrum	8.89908	46.1775	367	0.1067
Asplenium_adiantum-nigrum	8.86667	42.35	1495	19.0866
Asplenium_adiantum-nigrum	8.81667	41.55	58	0.1337
Asplenium_adiantum-nigrum	8.80845	46.298	1606	13.0954
Asplenium_adiantum-nigrum	8.79414	46.4845	985	1.1125
Asplenium_adiantum-nigrum	8.76667	42.25	367	8.2181
Asplenium_adiantum-nigrum	8.75089	46.1806	228	4.9498
Asplenium_adiantum-nigrum	8.75	46.08	1018	2.4441
Asplenium_adiantum-nigrum	8.68417	36.79	746	16.7725
Asplenium_adiantum-nigrum	8.67797	47.2711	528	31.2959
Asplenium_adiantum-nigrum	8.65	42.45		1.1423
Asplenium_adiantum-nigrum	8.63333	42.1833	109	4.0541
Asplenium_adiantum-nigrum	8.52548	47.1034	832	45.8727
Asplenium_adiantum-nigrum	8.50928	47.4207	456	14.8858
Asplenium_adiantum-nigrum	8.4655	63.6175		4.7922
Asplenium_adiantum-nigrum	8.43553	45.7448	353	13.473
Asplenium_adiantum-nigrum	8.37155	46.9653	447	38.6541
Asplenium_adiantum-nigrum	8.3	36.48	636	44.3301
Asplenium_adiantum-nigrum	8.25858	46.8807	631	32.4867
Asplenium_adiantum-nigrum	8.221	45.0987	359	11.6637
Asplenium_adiantum-nigrum	8.17383	44.0077	10	0.2196
Asplenium_adiantum-nigrum	8.14278	46.1956	1205	19.1041
Asplenium_adiantum-nigrum	8.073	46.372	937	0.5725
Asplenium_adiantum-nigrum	8.06596	44.362	576	30.1523
Asplenium_adiantum-nigrum	8.00712	58.0643		5.8495
Asplenium_adiantum-nigrum	7.97472	46.3199	991	0.79
Asplenium_adiantum-nigrum	7.9612	63.091		2.1174
Asplenium_adiantum-nigrum	7.96111	48.0939	281	21.8099
Asplenium_adiantum-nigrum	7.94423	44.3271	831	36.531
Asplenium_adiantum-nigrum	7.94327	44.8005	311	28.3979
Asplenium_adiantum-nigrum	7.943	43.9053	177	5.453
Asplenium_adiantum-nigrum	7.77583	46.3217	1071	0.3877
Asplenium_adiantum-nigrum	7.74694	49.1825	231	47.9806
Asplenium_adiantum-nigrum	7.7448	63.037	240	0.2339
Asplenium_adiantum-nigrum	7.73021	58.012	9	5.0806
Asplenium_adiantum-nigrum	7.7	49.0333	314	38.5734
Asplenium_adiantum-nigrum	7.58681	57.9795	3	3.889
Asplenium_adiantum-nigrum	7.5476	63.0261	40	0.5188
Asplenium_adiantum-nigrum	7.53769	47.2434	769	32.6903
Asplenium_adiantum-nigrum	7.36	58.0006	37	2.1324
Asplenium_adiantum-nigrum	7.34694	50.2039	183	2.0032
Asplenium_adiantum-nigrum	7.29994	63.0313		2.6114
Asplenium_adiantum-nigrum	7.251	62.249	287	1.6504
Asplenium_adiantum-nigrum	7.21861	48.6592	446	57.2923
Asplenium_adiantum-nigrum	7.16899	58.0303	10	0.5653
Asplenium_adiantum-nigrum	7.1325	48.1858	909	27.0802
Asplenium_adiantum-nigrum	7.1144	62.938	120	5.2635
Asplenium_adiantum-nigrum	7.06778	46.1064	483	2.2217
Asplenium_adiantum-nigrum	7.00778	50.5197	242	21.9163
Asplenium_adiantum-nigrum	6.9994	62.269	1	0.6471
Asplenium_adiantum-nigrum	6.95556	47.9033	772	11.698
Asplenium_adiantum-nigrum	6.9242	62.7262	135	0.9689
Asplenium_adiantum-nigrum	6.87368	58.0687	22	1.2559
Asplenium_adiantum-nigrum	6.7931	62.8098	27	0.3813
Asplenium_adiantum-nigrum	6.72	43.38	12	0.765
Asplenium_adiantum-nigrum	6.7124	62.7113	20	1.4544
Asplenium_adiantum-nigrum	6.65167	48.0539	683	3.1363
Asplenium_adiantum-nigrum	6.63799	62.3984	100	3.3554
Asplenium_adiantum-nigrum	6.6052	62.211	260	5.2257
Asplenium_adiantum-nigrum	6.5429	58.2138	56	3.3785
Asplenium_adiantum-nigrum	6.45437	62.7364	33	12.3433
Asplenium_adiantum-nigrum	6.4144	62.4277	20	0.1556
Asplenium_adiantum-nigrum	6.41172	49.6311	236	0.0119
Asplenium_adiantum-nigrum	6.40389	48.1608	433	4.4948
Asplenium_adiantum-nigrum	6.37	49.8178	328	15.5026
Asplenium_adiantum-nigrum	6.33466	58.2932	94	0.1888
Asplenium_adiantum-nigrum	6.2746	62.6855	30	8.4502
Asplenium_adiantum-nigrum	6.25095	49.5108	231	9.2344
Asplenium_adiantum-nigrum	6.2129	59.3424	45	0.2475
Asplenium_adiantum-nigrum	6.20194	49.9339	262	34.1293
Asplenium_adiantum-nigrum	6.1785	62.4945	0	5.0532
Asplenium_adiantum-nigrum	6.15759	51.492	17	2.2629
Asplenium_adiantum-nigrum	6.15613	58.953	70	1.7723
Asplenium_adiantum-nigrum	6.14422	59.0965	48	5.4891
Asplenium_adiantum-nigrum	6.12649	49.7383	353	28.0539
Asplenium_adiantum-nigrum	6.107	62.5901	17	14.3195
Asplenium_adiantum-nigrum	6.10469	62.0066	295	7.2522
Asplenium_adiantum-nigrum	6.06791	49.8884	295	40.7704
Asplenium_adiantum-nigrum	6.06635	58.3799		0.6831
Asplenium_adiantum-nigrum	6.05861	49.1564	328	7.4448
Asplenium_adiantum-nigrum	6.04611	47.9508	263	44.3757
Asplenium_adiantum-nigrum	6.04453	58.8337	389	3.2394
Asplenium_adiantum-nigrum	6.03806	52.5675	-1	5.1131
Asplenium_adiantum-nigrum	6.036	59.2024	154	1.5731
Asplenium_adiantum-nigrum	6.01632	49.4748	387	18.1399
Asplenium_adiantum-nigrum	6.0116	59.9859	26	2.9398
Asplenium_adiantum-nigrum	5.9986	58.9697	11	1.8055
Asplenium_adiantum-nigrum	5.97083	48.6506	295	0.1738
Asplenium_adiantum-nigrum	5.96431	59.353		1.3046
Asplenium_adiantum-nigrum	5.96154	50.7829	206	26.0726
Asplenium_adiantum-nigrum	5.93811	62.4682		3.9711
Asplenium_adiantum-nigrum	5.93198	49.7983	298	47.8409
Asplenium_adiantum-nigrum	5.9119	59.4744		0.4287
Asplenium_adiantum-nigrum	5.90741	62.5799		15.0369
Asplenium_adiantum-nigrum	5.90359	49.9106	369	56.0432
Asplenium_adiantum-nigrum	5.9	44.9	988	46.5912
Asplenium_adiantum-nigrum	5.89511	49.6859	294	41.9032
Asplenium_adiantum-nigrum	5.87101	49.5464	337	34.0558
Asplenium_adiantum-nigrum	5.85211	51.188	28	3.7259
Asplenium_adiantum-nigrum	5.84931	59.1036	17	2.8704
Asplenium_adiantum-nigrum	5.82352	58.9852		2.1613
Asplenium_adiantum-nigrum	5.8164	59.2277	11	11.4552
Asplenium_adiantum-nigrum	5.814	62.3421		0.0678
Asplenium_adiantum-nigrum	5.81227	50.7483	136	11.3329
Asplenium_adiantum-nigrum	5.79763	58.5042	9	0.83
Asplenium_adiantum-nigrum	5.7797	59.5575	599	2.9611
Asplenium_adiantum-nigrum	5.72056	49.8442	403	63.3569
Asplenium_adiantum-nigrum	5.7198	59.9266	40	2.64
Asplenium_adiantum-nigrum	5.71611	50.5303	245	15.5897
Asplenium_adiantum-nigrum	5.7095	60.3844	1	0.1463
Asplenium_adiantum-nigrum	5.7045	62.2211	100	2.8737
Asplenium_adiantum-nigrum	5.66582	58.8065	20	7.8565
Asplenium_adiantum-nigrum	5.66	45.2	220	44.5554
Asplenium_adiantum-nigrum	5.651	59.7175	124	4.7673
Asplenium_adiantum-nigrum	5.64729	59.3625	48	2.1895
Asplenium_adiantum-nigrum	5.6336	59.1081		0.0126
Asplenium_adiantum-nigrum	5.6227	62.4018	3	5.4156
Asplenium_adiantum-nigrum	5.5995	60.1484		0.61
Asplenium_adiantum-nigrum	5.56929	52.0157	7	5.4174
Asplenium_adiantum-nigrum	5.53167	50.2144	219	38.4327
Asplenium_adiantum-nigrum	5.53167	50.4267	156	17.9783
Asplenium_adiantum-nigrum	5.5014	59.7675	31	2.8366
Asplenium_adiantum-nigrum	5.49624	51.9259	5	3.0132
Asplenium_adiantum-nigrum	5.47389	49.5081	200	27.6391
Asplenium_adiantum-nigrum	5.4619	58.9512		7.3309
Asplenium_adiantum-nigrum	5.4563	59.1699	8	0.0607
Asplenium_adiantum-nigrum	5.4556	59.9332	255	1.7844
Asplenium_adiantum-nigrum	5.44	50.56	216	2.8833
Asplenium_adiantum-nigrum	5.42766	43.907	316	19.0293
Asplenium_adiantum-nigrum	5.4089	61.6316	340	3.7532
Asplenium_adiantum-nigrum	5.38633	59.6999	8	2.7135
Asplenium_adiantum-nigrum	5.3775	50.3161	163	22.6756
Asplenium_adiantum-nigrum	5.3671	60.343	200	8.7184
Asplenium_adiantum-nigrum	5.36376	62.2092	180	6.5848
Asplenium_adiantum-nigrum	5.36147	59.0401		14.1313
Asplenium_adiantum-nigrum	5.3417	60.855		1.0303
Asplenium_adiantum-nigrum	5.3397	60.1661	117	1.1141
Asplenium_adiantum-nigrum	5.33869	59.3032	12	3.3806
Asplenium_adiantum-nigrum	5.3371	60.5703	220	0.05
Asplenium_adiantum-nigrum	5.33497	53.0674	1	1.8426
Asplenium_adiantum-nigrum	5.31744	49.9549	425	41.4478
Asplenium_adiantum-nigrum	5.308	62.0478		1.046
Asplenium_adiantum-nigrum	5.29325	52.7011	2	32.4781
Asplenium_adiantum-nigrum	5.26667	40.3167		103.255
Asplenium_adiantum-nigrum	5.2508	61.8517		1.7227
Asplenium_adiantum-nigrum	5.24749	59.1501	20	0.413
Asplenium_adiantum-nigrum	5.2381	59.6051	17	3.558
Asplenium_adiantum-nigrum	5.23043	50.205	220	30.6482
Asplenium_adiantum-nigrum	5.22	59.3556	17	2.0789
Asplenium_adiantum-nigrum	5.21	51.56	17	17.9511
Asplenium_adiantum-nigrum	5.1994	53.3638	2	1.095
Asplenium_adiantum-nigrum	5.19713	60.4839	40	1.221
Asplenium_adiantum-nigrum	5.1788	60.2346	13	4.2698
Asplenium_adiantum-nigrum	5.1772	59.704	31	0.7454
Asplenium_adiantum-nigrum	5.17563	51.9623	3	0.5054
Asplenium_adiantum-nigrum	5.1518	61.928	300	2.9954
Asplenium_adiantum-nigrum	5.1356	59.9851	65	7.2019
Asplenium_adiantum-nigrum	5.13337	59.2617		3.3995
Asplenium_adiantum-nigrum	5.13176	52.1055	4	10.4489
Asplenium_adiantum-nigrum	5.1105	62.1712	180	1.8702
Asplenium_adiantum-nigrum	5.1025	50.1658	150	19.3373
Asplenium_adiantum-nigrum	5.087	62.017		0.236
Asplenium_adiantum-nigrum	5.0848	60.0709	3	8.933
Asplenium_adiantum-nigrum	5.07447	59.4371	2	11.1683
Asplenium_adiantum-nigrum	5.0316	60.3038	3	0.0166
Asplenium_adiantum-nigrum	4.9975	60.5317		0.8929
Asplenium_adiantum-nigrum	4.9777	61.5037	1	7.72
Asplenium_adiantum-nigrum	4.96917	49.8422	216	12.0567
Asplenium_adiantum-nigrum	4.9619	60.4418	3	0.0454
Asplenium_adiantum-nigrum	4.96028	50.4864	149	0.0108
Asplenium_adiantum-nigrum	4.9574	60.6538	0	9.3979
Asplenium_adiantum-nigrum	4.93413	52.8778	-2	3.3133
Asplenium_adiantum-nigrum	4.92273	52.5542	-5	30.8124
Asplenium_adiantum-nigrum	4.92222	50.2208	134	1.8298
Asplenium_adiantum-nigrum	4.91282	52.1048	-1	14.3742
Asplenium_adiantum-nigrum	4.8765	61.2791		7.6952
Asplenium_adiantum-nigrum	4.87593	59.2956		29.0197
Asplenium_adiantum-nigrum	4.85712	60.5646	7	2.8379
Asplenium_adiantum-nigrum	4.84889	50.3475	140	0.9887
Asplenium_adiantum-nigrum	4.7862	60.6599		0.1694
Asplenium_adiantum-nigrum	4.73983	52.9578	0	0.4467
Asplenium_adiantum-nigrum	4.73139	45.4142	207	2.5169
Asplenium_adiantum-nigrum	4.69528	52.0138	0	10.6581
Asplenium_adiantum-nigrum	4.65614	52.6248	2	3.2623
Asplenium_adiantum-nigrum	4.6254	45.25	579	17.3905
Asplenium_adiantum-nigrum	4.61626	52.3728	2	7.6804
Asplenium_adiantum-nigrum	4.61469	52.4627	7	3.8912
Asplenium_adiantum-nigrum	4.6075	50.0719	160	10.6145
Asplenium_adiantum-nigrum	4.56472	44.8653	316	22.3652
Asplenium_adiantum-nigrum	4.447	51.895	2	0.9377
Asplenium_adiantum-nigrum	4.41425	52.2096	4	1.5221
Asplenium_adiantum-nigrum	4.40194	51.2353	3	0.6727
Asplenium_adiantum-nigrum	4.36639	51.0861	6	6.8305
Asplenium_adiantum-nigrum	4.28722	50.3408	144	51.1699
Asplenium_adiantum-nigrum	4.24055	51.0997	6	2.4247
Asplenium_adiantum-nigrum	4.22194	50.6078	71	43.5101
Asplenium_adiantum-nigrum	4.213	51.5156	-1	0.588
Asplenium_adiantum-nigrum	4.19431	50.0642	202	44.7635
Asplenium_adiantum-nigrum	4.10445	51.9167	2	6.1507
Asplenium_adiantum-nigrum	4.06306	40.76		68.1883
Asplenium_adiantum-nigrum	3.97	39.93		0.6257
Asplenium_adiantum-nigrum	3.93797	46.0684	356	11.9587
Asplenium_adiantum-nigrum	3.90323	51.7368	0	0.4959
Asplenium_adiantum-nigrum	3.86306	50.5461	72	29.6285
Asplenium_adiantum-nigrum	3.79583	47.3806	322	14.9222
Asplenium_adiantum-nigrum	3.77688	44.1641	339	19.9386
Asplenium_adiantum-nigrum	3.77604	51.2407	0	10.9364
Asplenium_adiantum-nigrum	3.77289	51.3306	-2	1.9507
Asplenium_adiantum-nigrum	3.68865	44.295	790	9.2245
Asplenium_adiantum-nigrum	3.4575	50.7125	19	5.0613
Asplenium_adiantum-nigrum	3.41504	45.3511	560	53.8226
Asplenium_adiantum-nigrum	3.38868	45.1344	566	51.4898
Asplenium_adiantum-nigrum	3.26667	44.5333	658	20.986
Asplenium_adiantum-nigrum	3.25778	50.8194	20	14.9771
Asplenium_adiantum-nigrum	3.20944	51.2192	3	12.5111
Asplenium_adiantum-nigrum	3.18	41.87		0.4648
Asplenium_adiantum-nigrum	3.18	42.5		3.1827
Asplenium_adiantum-nigrum	3.06	42.41	258	11.0989
Asplenium_adiantum-nigrum	2.92	51.2269	8	1.7078
Asplenium_adiantum-nigrum	2.91667	50.9203	9	30.3509
Asplenium_adiantum-nigrum	2.79	42.39	326	30.9435
Asplenium_adiantum-nigrum	2.78	50.9597	0	21.7048
Asplenium_adiantum-nigrum	2.76	42.15	221	35.6565
Asplenium_adiantum-nigrum	2.75	42.01	170	32.7993
Asplenium_adiantum-nigrum	2.68	42.08	804	41.7318
Asplenium_adiantum-nigrum	2.57	42.95	536	46.9047
Asplenium_adiantum-nigrum	2.55561	44.8995	745	46.9092
Asplenium_adiantum-nigrum	2.54	42.29	671	57.6325
Asplenium_adiantum-nigrum	2.54	42.14	666	53.4167
Asplenium_adiantum-nigrum	2.48	41.68	161	12.6823
Asplenium_adiantum-nigrum	2.44	41.77	1476	22.4956
Asplenium_adiantum-nigrum	2.39	41.85	790	31.6912
Asplenium_adiantum-nigrum	2.36	42.32	1115	49.3944
Asplenium_adiantum-nigrum	2.27	41.68	301	21.261
Asplenium_adiantum-nigrum	2.25	42.13	807	47.1842
Asplenium_adiantum-nigrum	2.2017	42.5761	1234	31.8107
Asplenium_adiantum-nigrum	2.15	42.35	1621	28.2404
Asplenium_adiantum-nigrum	2.09	41.41	371	11.032
Asplenium_adiantum-nigrum	2.00139	40.8306		43.0153
Asplenium_adiantum-nigrum	1.98	41.86	341	50.1785
Asplenium_adiantum-nigrum	1.96	42.37	1691	9.6647
Asplenium_adiantum-nigrum	1.8466	42.2826	1130	12.062
Asplenium_adiantum-nigrum	1.78	41.58	485	34.5178
Asplenium_adiantum-nigrum	1.72	42.4	1702	1.1618
Asplenium_adiantum-nigrum	1.63	42.34	1362	4.2642
Asplenium_adiantum-nigrum	1.51	41.78	567	33.8937
Asplenium_adiantum-nigrum	1.39	42.4402	1558	9.1678
Asplenium_adiantum-nigrum	1.3484	42.3215	1004	1.7873
Asplenium_adiantum-nigrum	1.25	42.62	1100	31.6644
Asplenium_adiantum-nigrum	1.2281	42.2837	1582	11.838
Asplenium_adiantum-nigrum	1.15	41.31	498	21.6218
Asplenium_adiantum-nigrum	1.15	42.5	1341	26.8703
Asplenium_adiantum-nigrum	1.14	42.37	1229	22.594
Asplenium_adiantum-nigrum	0.994333	42.3353	1051	31.8603
Asplenium_adiantum-nigrum	0.99	41.34	965	28.2843
Asplenium_adiantum-nigrum	0.906	42.717	1799	1.8303
Asplenium_adiantum-nigrum	0.87	42.57	2562	9.36
Asplenium_adiantum-nigrum	0.845	41.24	366	21.5933
Asplenium_adiantum-nigrum	0.804	42.823	1106	8.0963
Asplenium_adiantum-nigrum	0.75	42.48	1613	24.0909
Asplenium_adiantum-nigrum	0.6758	42.7871	1107	2.332
Asplenium_adiantum-nigrum	0.33	40.85	977	18.5648
Asplenium_adiantum-nigrum	0.12	40.58	902	35.6153
Asplenium_adiantum-nigrum	0.1	40.68	1195	42.9933
Asplenium_adiantum-nigrum	0.070319	42.5627	1677	66.0606
Asplenium_adiantum-nigrum	0.02	40.31	844	23.128
Asplenium_adiantum-nigrum	-0.004467	53.1556	38	21.9462
Asplenium_adiantum-nigrum	-0.16	40.4	834	43.0725
Asplenium_adiantum-nigrum	-0.164799	42.6281	1470	84.3406
Asplenium_adiantum-nigrum	-0.23	42.76	1809	84.4767
Asplenium_adiantum-nigrum	-0.25	39.85	387	12.6479
Asplenium_adiantum-nigrum	-0.266	42.253	1078	77.9221
Asplenium_adiantum-nigrum	-0.327258	52.9201	8	33.6502
Asplenium_adiantum-nigrum	-0.339838	42.8124	1662	93.3028
Asplenium_adiantum-nigrum	-0.36114	40.2488	1362	47.0973
Asplenium_adiantum-nigrum	-0.37	39.86	642	22.7296
Asplenium_adiantum-nigrum	-0.41739	42.9111	1081	98.8444
Asplenium_adiantum-nigrum	-0.4246	39.6744	289	17.2532
Asplenium_adiantum-nigrum	-0.48	39.95	666	36.9382
Asplenium_adiantum-nigrum	-0.61	43.01	621	103.752
Asplenium_adiantum-nigrum	-0.62	40.02	1078	52.3275
Asplenium_adiantum-nigrum	-0.71	42.8	1254	106.302
Asplenium_adiantum-nigrum	-0.7308	42.6891	884	95.165
Asplenium_adiantum-nigrum	-0.758366	52.8989	68	21.0285
Asplenium_adiantum-nigrum	-0.839	42.878	1419	94.3174
Asplenium_adiantum-nigrum	-0.84	39.87	1222	62.5223
Asplenium_adiantum-nigrum	-0.85333	43.0125	462	84.3173
Asplenium_adiantum-nigrum	-1.114	42.703	692	72.4396
Asplenium_adiantum-nigrum	-1.13	39.79	538	85.1841
Asplenium_adiantum-nigrum	-1.15	41.22	790	51.6174
Asplenium_adiantum-nigrum	-1.19	39.87	930	83.0479
Asplenium_adiantum-nigrum	-1.2	42.9	1043	67.2125
Asplenium_adiantum-nigrum	-1.24	42.21	420	27.3771
Asplenium_adiantum-nigrum	-1.27	41.13	943	55.2872
Asplenium_adiantum-nigrum	-1.273	43.119	293	45.7693
Asplenium_adiantum-nigrum	-1.28	42.64	837	57.3487
Asplenium_adiantum-nigrum	-1.29	40.32	1261	42.9915
Asplenium_adiantum-nigrum	-1.3	39.87	1057	77.4553
Asplenium_adiantum-nigrum	-1.31	40.2	1163	49.4695
Asplenium_adiantum-nigrum	-1.35	41.31	875	54.0969
Asplenium_adiantum-nigrum	-1.392	43.256	282	27.6621
Asplenium_adiantum-nigrum	-1.4	40.96	1044	34.5166
Asplenium_adiantum-nigrum	-1.41	40.41	1349	28.0037
Asplenium_adiantum-nigrum	-1.413	42.914	1107	54.5337
Asplenium_adiantum-nigrum	-1.443	42.726	719	56.3616
Asplenium_adiantum-nigrum	-1.484	43.014	923	42.4361
Asplenium_adiantum-nigrum	-1.4908	41.0175	1293	31.9293
Asplenium_adiantum-nigrum	-1.5	41.5	484	44.4549
Asplenium_adiantum-nigrum	-1.51	41.39	1077	54.4304
Asplenium_adiantum-nigrum	-1.54	43.276	149	17.3028
Asplenium_adiantum-nigrum	-1.567	43.177	630	24.1714
Asplenium_adiantum-nigrum	-1.586	42.872	777	53.2986
Asplenium_adiantum-nigrum	-1.599	39.8297	1139	72.8602
Asplenium_adiantum-nigrum	-1.61	39.97	1091	58.7874
Asplenium_adiantum-nigrum	-1.615	42.656	819	43.0283
Asplenium_adiantum-nigrum	-1.6355	41.4967	966	52.4593
Asplenium_adiantum-nigrum	-1.64	40.78	1268	4.589
Asplenium_adiantum-nigrum	-1.64	40.54	1517	2.3882
Asplenium_adiantum-nigrum	-1.688	43.269	65	12.662
Asplenium_adiantum-nigrum	-1.7039	40.4615	1715	10.3894
Asplenium_adiantum-nigrum	-1.7141	39.9211	1006	63.6921
Asplenium_adiantum-nigrum	-1.715	43.134	307	24.961
Asplenium_adiantum-nigrum	-1.73	41.74	1203	36.9106
Asplenium_adiantum-nigrum	-1.74	41.59	811	50.3814
Asplenium_adiantum-nigrum	-1.787	43.216	459	16.0578
Asplenium_adiantum-nigrum	-1.796	43.378		0.7989
Asplenium_adiantum-nigrum	-1.82012	42.8809	465	45.0978
Asplenium_adiantum-nigrum	-1.85	41.42	868	53.9627
Asplenium_adiantum-nigrum	-1.86	41.77	1554	42.452
Asplenium_adiantum-nigrum	-1.87	40.96	1171	10.6122
Asplenium_adiantum-nigrum	-1.908	43.325	138	0.1466
Asplenium_adiantum-nigrum	-1.92097	55.6434	124	6.3926
Asplenium_adiantum-nigrum	-1.926	43.028	647	29.3081
Asplenium_adiantum-nigrum	-1.95	42.79	955	36.9935
Asplenium_adiantum-nigrum	-1.98	41.77	1061	38.8715
Asplenium_adiantum-nigrum	-1.985	43.182	283	14.3999
Asplenium_adiantum-nigrum	-2	42.09	729	23.5585
Asplenium_adiantum-nigrum	-2.06812	42.6315	718	18.9046
Asplenium_adiantum-nigrum	-2.08	36.78	246	0.8198
Asplenium_adiantum-nigrum	-2.11	41.82	1259	29.2742
Asplenium_adiantum-nigrum	-2.1111	40.8798	1156	5.2794
Asplenium_adiantum-nigrum	-2.13122	42.7889	575	33.1592
Asplenium_adiantum-nigrum	-2.2	43.04	258	25.7048
Asplenium_adiantum-nigrum	-2.205	43.292	127	2.2124
Asplenium_adiantum-nigrum	-2.21	42.3	721	14.3997
Asplenium_adiantum-nigrum	-2.21122	42.6989	674	21.9503
Asplenium_adiantum-nigrum	-2.2549	41.8086	1156	17.4502
Asplenium_adiantum-nigrum	-2.3	42.9	884	40.3785
Asplenium_adiantum-nigrum	-2.33	42.14	1319	33.0453
Asplenium_adiantum-nigrum	-2.34	42.64	1216	15.2073
Asplenium_adiantum-nigrum	-2.35733	57.4613	102	21.0774
Asplenium_adiantum-nigrum	-2.37123	43.1489	613	16.374
Asplenium_adiantum-nigrum	-2.4	43.4		6.9032
Asplenium_adiantum-nigrum	-2.41123	42.9989	853	31.8833
Asplenium_adiantum-nigrum	-2.44	42.7	786	17.3778
Asplenium_adiantum-nigrum	-2.46	41.78	1061	1.2035
Asplenium_adiantum-nigrum	-2.48	44.1		70.5869
Asplenium_adiantum-nigrum	-2.4919	42.2872	1300	22.1097
Asplenium_adiantum-nigrum	-2.5	43.22	333	13.376
Asplenium_adiantum-nigrum	-2.53	43.05	609	30.4234
Asplenium_adiantum-nigrum	-2.54	42.61	1104	8.0384
Asplenium_adiantum-nigrum	-2.55	37.8667	1208	34.2263
Asplenium_adiantum-nigrum	-2.5678	41.8192	1060	3.9523
Asplenium_adiantum-nigrum	-2.57	42.75	1032	22.29
Asplenium_adiantum-nigrum	-2.58	41.24	1179	25.1101
Asplenium_adiantum-nigrum	-2.63	43.11	605	26.4672
Asplenium_adiantum-nigrum	-2.687	43.024	591	34.3565
Asplenium_adiantum-nigrum	-2.69	43.39		0.5126
Asplenium_adiantum-nigrum	-2.7	42.59	752	3.1758
Asplenium_adiantum-nigrum	-2.72	42.81	656	19.6251
Asplenium_adiantum-nigrum	-2.785	43.114	376	27.0396
Asplenium_adiantum-nigrum	-2.8	37.06	1642	32.9994
Asplenium_adiantum-nigrum	-2.82	42.23	903	28.3683
Asplenium_adiantum-nigrum	-2.82	41.96	1764	2.8051
Asplenium_adiantum-nigrum	-2.83	42.92	692	22.9205
Asplenium_adiantum-nigrum	-2.83	42.66	707	1.2619
Asplenium_adiantum-nigrum	-2.9047	42.0271	1780	6.563
Asplenium_adiantum-nigrum	-2.9164	42.2793	1191	30.5247
Asplenium_adiantum-nigrum	-2.93	43.04	489	28.5975
Asplenium_adiantum-nigrum	-2.94	43.42	52	0.0069
Asplenium_adiantum-nigrum	-2.95947	58.9839		1.7181
Asplenium_adiantum-nigrum	-2.98	43.2	854	12.4147
Asplenium_adiantum-nigrum	-2.99123	42.3589	764	28.2219
Asplenium_adiantum-nigrum	-2.99359	59.2922	60	1.8907
Asplenium_adiantum-nigrum	-3.01	37.05	1499	30.6617
Asplenium_adiantum-nigrum	-3.01	42.89	1102	11.7123
Asplenium_adiantum-nigrum	-3.02082	57.4509	337	21.816
Asplenium_adiantum-nigrum	-3.04	43.29	409	4.3142
Asplenium_adiantum-nigrum	-3.09	42.79	888	1.3344
Asplenium_adiantum-nigrum	-3.12	37.13	1972	38.2271
Asplenium_adiantum-nigrum	-3.14	40.97	997	55.154
Asplenium_adiantum-nigrum	-3.14125	43.3389	115	1.8644
Asplenium_adiantum-nigrum	-3.15	43.15	228	20.661
Asplenium_adiantum-nigrum	-3.19	36.97	1180	21.8381
Asplenium_adiantum-nigrum	-3.23	42.87	941	7.7466
Asplenium_adiantum-nigrum	-3.2431	42.0899	1182	31.92
Asplenium_adiantum-nigrum	-3.26	43.19	611	19.4843
Asplenium_adiantum-nigrum	-3.29126	43.3289	221	7.7102
Asplenium_adiantum-nigrum	-3.3	43.06	540	25.7746
Asplenium_adiantum-nigrum	-3.34125	42.7689	608	3.4552
Asplenium_adiantum-nigrum	-3.3473	41.225	1534	37.4452
Asplenium_adiantum-nigrum	-3.36	36.94	1079	19.7458
Asplenium_adiantum-nigrum	-3.36	37.05	3185	30.6613
Asplenium_adiantum-nigrum	-3.412	43.15	769	26.7011
Asplenium_adiantum-nigrum	-3.47279	55.202	93	21.1425
Asplenium_adiantum-nigrum	-3.51	37	1742	27.3093
Asplenium_adiantum-nigrum	-3.51126	43.3189	96	10.5987
Asplenium_adiantum-nigrum	-3.53	41.06	1167	57.4767
Asplenium_adiantum-nigrum	-3.56126	43.2289	1039	20.8689
Asplenium_adiantum-nigrum	-3.6687	41.1515	1112	51.0596
Asplenium_adiantum-nigrum	-3.6857	42.7636	910	5.438
Asplenium_adiantum-nigrum	-3.7144	43.1326	987	22.2052
Asplenium_adiantum-nigrum	-3.75116	37.6688	758	29.2032
Asplenium_adiantum-nigrum	-3.77	40.94	1192	73.2525
Asplenium_adiantum-nigrum	-3.7927	43.4833	38	0.6601
Asplenium_adiantum-nigrum	-3.8	42.95	921	9.9467
Asplenium_adiantum-nigrum	-3.8439	42.7085	802	14.36
Asplenium_adiantum-nigrum	-4.0333	40.8425	1274	78.391
Asplenium_adiantum-nigrum	-4.0671	40.7341	1223	81.0221
Asplenium_adiantum-nigrum	-4.15	43.37	236	4.9865
Asplenium_adiantum-nigrum	-4.29	43.01	1053	0.7746
Asplenium_adiantum-nigrum	-4.2918	43.1096	735	9.1832
Asplenium_adiantum-nigrum	-4.32339	57.2381	552	13.168
Asplenium_adiantum-nigrum	-4.43	43.051	1523	12.5456
Asplenium_adiantum-nigrum	-4.4813	40.7206	1521	77.2685
Asplenium_adiantum-nigrum	-4.4818	43.3414	114	4.2213
Asplenium_adiantum-nigrum	-4.53	42.85	1195	27.6706
Asplenium_adiantum-nigrum	-4.53615	55.428	97	9.8825
Asplenium_adiantum-nigrum	-4.56	40.39	989	43.5371
Asplenium_adiantum-nigrum	-4.6115	43.1145	777	29.4025
Asplenium_adiantum-nigrum	-4.66	43.3	633	11.2032
Asplenium_adiantum-nigrum	-4.78	42.93	1434	29.8211
Asplenium_adiantum-nigrum	-4.871	43.018	1252	21.5291
Asplenium_adiantum-nigrum	-4.89084	51.854	74	7.2104
Asplenium_adiantum-nigrum	-4.91	43.29	1091	16.9039
Asplenium_adiantum-nigrum	-4.95	52		0.7489
Asplenium_adiantum-nigrum	-5.005	36.538	267	7.5818
Asplenium_adiantum-nigrum	-5.008	36.628	909	15.5718
Asplenium_adiantum-nigrum	-5.1	43.4	57	8.0955
Asplenium_adiantum-nigrum	-5.1544	33.3325	1905	11.4771
Asplenium_adiantum-nigrum	-5.1833	39.1333	342	2.0188
Asplenium_adiantum-nigrum	-5.2065	32.9673	1893	2.9674
Asplenium_adiantum-nigrum	-5.23102	43.1092	1094	21.0617
Asplenium_adiantum-nigrum	-5.2338	36.4826	955	8.5616
Asplenium_adiantum-nigrum	-5.26	39.6	668	19.1741
Asplenium_adiantum-nigrum	-5.3051	42.8905	1035	15.3442
Asplenium_adiantum-nigrum	-5.34	43.4	429	12.3949
Asplenium_adiantum-nigrum	-5.49957	34.036	856	25.5521
Asplenium_adiantum-nigrum	-5.51046	42.8075	1039	31.3775
Asplenium_adiantum-nigrum	-5.55	40.14	967	31.0051
Asplenium_adiantum-nigrum	-5.57357	55.687	201	5.2243
Asplenium_adiantum-nigrum	-5.6	43.32	469	23.5634
Asplenium_adiantum-nigrum	-5.63	42.83	1097	37.7221
Asplenium_adiantum-nigrum	-5.63	42.74	976	29.7783
Asplenium_adiantum-nigrum	-5.63	42.92	1439	46.0358
Asplenium_adiantum-nigrum	-5.7	36.4833	99	36.7308
Asplenium_adiantum-nigrum	-5.7	43.56	48	0.8853
Asplenium_adiantum-nigrum	-5.71	40.26	1221	46.2012
Asplenium_adiantum-nigrum	-5.736	42.875	1162	46.7574
Asplenium_adiantum-nigrum	-5.77	43.07	587	49.9782
Asplenium_adiantum-nigrum	-5.77	43.27	330	30.4826
Asplenium_adiantum-nigrum	-5.85	40.32	790	48.9892
Asplenium_adiantum-nigrum	-5.88	43	1496	58.9083
Asplenium_adiantum-nigrum	-5.89	43.38	384	20.917
Asplenium_adiantum-nigrum	-6	43.06	1558	51.4359
Asplenium_adiantum-nigrum	-6.0249	41.8522	876	21.6301
Asplenium_adiantum-nigrum	-6.03	43.2	421	37.1757
Asplenium_adiantum-nigrum	-6.06	41.56	799	3.638
Asplenium_adiantum-nigrum	-6.09	43.28	913	28.9387
Asplenium_adiantum-nigrum	-6.11	40.41	467	56.4788
Asplenium_adiantum-nigrum	-6.2181	41.8673	1096	27.4568
Asplenium_adiantum-nigrum	-6.23	43.27	499	30.8675
Asplenium_adiantum-nigrum	-6.23943	57.3313	236	7.8771
Asplenium_adiantum-nigrum	-6.24	43	1490	57.3504
Asplenium_adiantum-nigrum	-6.24	42.91	1307	66.2842
Asplenium_adiantum-nigrum	-6.25	42.73	1161	76.5424
Asplenium_adiantum-nigrum	-6.32	42.6314	789	79.7699
Asplenium_adiantum-nigrum	-6.36	43.01	1455	55.4148
Asplenium_adiantum-nigrum	-6.37	42.92	1688	64.1727
Asplenium_adiantum-nigrum	-6.39	42.38	1292	79.9465
Asplenium_adiantum-nigrum	-6.39	43.55	66	1.5002
Asplenium_adiantum-nigrum	-6.43252	41.3229	470	1.2325
Asplenium_adiantum-nigrum	-6.495	42.304	931	77.7106
Asplenium_adiantum-nigrum	-6.5	42.74	956	80.7535
Asplenium_adiantum-nigrum	-6.5	42.56	704	95.7147
Asplenium_adiantum-nigrum	-6.5064	42.1981	2051	68.7505
Asplenium_adiantum-nigrum	-6.5286	40.3522	907	57.0363
Asplenium_adiantum-nigrum	-6.59	43.55		2.2441
Asplenium_adiantum-nigrum	-6.626	42.36	925	88.7018
Asplenium_adiantum-nigrum	-6.67	37.7	387	44.4086
Asplenium_adiantum-nigrum	-6.7395	42.1129	1092	75.9503
Asplenium_adiantum-nigrum	-6.7465	42.2571	1660	87.0186
Asplenium_adiantum-nigrum	-6.78	40.22	860	43.5541
Asplenium_adiantum-nigrum	-6.805	42.445	558	85.8774
Asplenium_adiantum-nigrum	-6.81	41.04	175	1.6689
Asplenium_adiantum-nigrum	-6.852	41.788	1025	55.8947
Asplenium_adiantum-nigrum	-6.86	42.66	953	66.6581
Asplenium_adiantum-nigrum	-6.9228	42.7918	1033	52.4147
Asplenium_adiantum-nigrum	-6.99705	42.0006	1135	81.191
Asplenium_adiantum-nigrum	-7.00764	42.4331	431	69.5201
Asplenium_adiantum-nigrum	-7.0299	46.2416		253.443
Asplenium_adiantum-nigrum	-7.045	42.7939	1043	45.3831
Asplenium_adiantum-nigrum	-7.05724	42.1604	966	73.3594
Asplenium_adiantum-nigrum	-7.07641	42.5693	1022	56.2919
Asplenium_adiantum-nigrum	-7.1675	41.7561	488	56.6594
Asplenium_adiantum-nigrum	-7.2	38.94	356	12.9803
Asplenium_adiantum-nigrum	-7.21	42.33	374	52.6109
Asplenium_adiantum-nigrum	-7.2474	42.554	543	43.2809
Asplenium_adiantum-nigrum	-7.25202	42.8243	768	28.5112
Asplenium_adiantum-nigrum	-7.3645	42.2148	1359	44.4424
Asplenium_adiantum-nigrum	-7.4298	42.0794	818	49.0543
Asplenium_adiantum-nigrum	-7.43867	40.1317	567	45.5737
Asplenium_adiantum-nigrum	-7.47073	41.6165	804	40.2467
Asplenium_adiantum-nigrum	-7.48	42.4	378	24.8687
Asplenium_adiantum-nigrum	-7.54	40.38	1169	70.0126
Asplenium_adiantum-nigrum	-7.60632	42.2978	773	21.1448
Asplenium_adiantum-nigrum	-7.80543	41.0049	1058	15.5289
Asplenium_adiantum-nigrum	-7.82839	42.351	332	1.9005
Asplenium_adiantum-nigrum	-7.85	31.21	2628	97.3632
Asplenium_adiantum-nigrum	-7.9457	43.7512		1.3463
Asplenium_adiantum-nigrum	-7.96736	42.0191	690	25.0318
Asplenium_adiantum-nigrum	-8.01	43.23	328	21.647
Asplenium_adiantum-nigrum	-8.0214	42.9055	432	36.7107
Asplenium_adiantum-nigrum	-8.07259	43.4834	256	9.4398
Asplenium_adiantum-nigrum	-8.09126	42.2228	451	6.7274
Asplenium_adiantum-nigrum	-8.1339	43.6177	107	1.0929
Asplenium_adiantum-nigrum	-8.144	43.264	206	8.2487
Asplenium_adiantum-nigrum	-8.1453	42.8074	363	43.7598
Asplenium_adiantum-nigrum	-8.1586	41.8169	1107	33.4491
Asplenium_adiantum-nigrum	-8.346	42.7784	81	39.5322
Asplenium_adiantum-nigrum	-8.4689	54.1118	86	10.4868
Asplenium_adiantum-nigrum	-8.6345	42.81	41	15.5187
Asplenium_adiantum-nigrum	-8.69356	42.9465	259	22.5799
Asplenium_adiantum-nigrum	-8.69793	42.0459	86	4.6427
Asplenium_adiantum-nigrum	-8.73	42.14	217	8.8554
Asplenium_adiantum-nigrum	-8.9045	42.1982	52	6.8579
Asplenium_adiantum-nigrum	-9.0014	42.9907	285	15.1887
Asplenium_adiantum-nigrum	-9.05	39.19	524	18.7918
Asplenium_adiantum-nigrum	-9.05278	39.5922	74	3.5839
Asplenium_adiantum-nigrum	-9.25148	42.9961	75	0.8996
Asplenium_adiantum-nigrum	-9.28	29.7561	1222	49.9604
Asplenium_adiantum-nigrum	-9.3333	29.5667	1127	55.6648
Asplenium_adiantum-nigrum	-15.5833	28.1017	508	4.5828
Asplenium_adiantum-nigrum	-15.6867	28.0661	1108	2.6813
Asplenium_adiantum-nigrum	-16.1764	28.5581	711	1.3631
Asplenium_adiantum-nigrum	-16.3039	28.5347	809	2.6585
Asplenium_adiantum-nigrum	-16.4886	28.3392	2056	8.6933
Asplenium_adiantum-nigrum	-16.7719	28.3639	476	0.2343
Asplenium_adiantum-nigrum	-16.8808	32.7289	1119	8.1893
Asplenium_adiantum-nigrum	-17.1308	32.7547	1278	4.9012
Asplenium_adiantum-nigrum	-17.2417	28.1083	1367	8.1134
Asplenium_adiantum-nigrum	-17.8189	28.8017	983	3.931
Asplenium_adiantum-nigrum	-17.8364	28.6136	1496	7.5017
Asplenium_adiantum-nigrum	-17.9319	27.7889	800	3.202
Asplenium_adiantum-nigrum	-18.0128	27.7289	1305	4.6579
Asplenium_adiantum-nigrum	-24.3817	14.9175	2152	8.0921
Asplenium_adiantum-nigrum	-25.3958	14.9264		63.9685
Asplenium_adiantum-nigrum	-25.4984	37.8	177	4.5094
Asplenium_adiantum-nigrum	-28.0062	39.0486	200	3.1981
Asplenium_adiantum-nigrum	-28.0389	38.648	634	1.8637
Asplenium_adiantum-nigrum	-28.2866	38.4626	728	4.0997
Asplenium_adiantum-nigrum	-28.4847	38.4486	104	1.9751
Asplenium_adiantum-nigrum	-31.1167	39.45		1.5607
Asplenium_adiantum-nigrum	-31.2558	39.4586	201	1.6443
Asplenium_adiantum-nigrum	-82.4418	29.6516	42	48.5483
Asplenium_adiantum-nigrum	-99.1331	22.8784	109	96.7371
Asplenium_adiantum-nigrum	-99.21	21.97	376	22.1603
Asplenium_adiantum-nigrum	-106.933	26.8333	2498	7.2615
Asplenium_adiantum-nigrum	-111.604	35.2301	2253	88.5981
Asplenium_adiantum-nigrum	-155	19		30.095
Asplenium_adiantum-nigrum	-155.384	19.4974	2089	25.5536
Asplenium_adiantum-nigrum	-155.448	19.7389	2460	32.3352
Asplenium_adiantum-nigrum	-155.512	19.5204	3422	33.7991
Asplenium_adiantum-nigrum	-155.58	19.5413	3368	35.668
Asplenium_adiantum-nigrum	-155.6	19.5	3857	31.9851
Asplenium_adiantum-nigrum	-155.6	19.2	1416	11.1526
Asplenium_adiantum-nigrum	-156.3	20.8	846	13.9938
Asplenium_adiantum-nigrum	-156.314	20.68	2230	9.3695
Asplenium_adiantum-nigrum	-156.345	20.791	553	11.6246
Asplenium_adiantum-nigrum	-156.5	20.8667	114	4.1917
Asplenium_adiantum-nigrum	-157.023	21.1444	302	3.993
Asplenium_adiantum-nigrum	-159.5	22.05	1259	15.8409
Asplenium_adiantum-nigrum	-159.576	22.1112	1129	9.7659
Asplenium_adiantum-nigrum	-159.659	22.1201	1112	5.0306
Asplenium_adulterinum	29.5245	63.1299	120	113.258
Asplenium_adulterinum	28.8747	63.0457	139	166.351
Asplenium_adulterinum	28.7418	62.9557	191	175.21
Asplenium_adulterinum	23.6416	60.3044	84	24.9489
Asplenium_adulterinum	23.2923	60.2954	53	21.5424
Asplenium_adulterinum	16.2736	49.3658	464	79.8703
Asplenium_adulterinum	16.1858	49.1078	318	72.7332
Asplenium_adulterinum	15.9167	47.6667	551	64.7484
Asplenium_adulterinum	15.5806	47.6528	895	37.8714
Asplenium_adulterinum	15.4583	47.4611	804	15.6903
Asplenium_adulterinum	15.3239	47.3561	796	1.2482
Asplenium_adulterinum	14.9167	47.2833	648	1.0085
Asplenium_adulterinum	14.4583	47.4617	1551	24.4292
Asplenium_adulterinum	14.3465	48.8827	568	3.1113
Asplenium_adulterinum	14.2983	58.7757	140	72.4908
Asplenium_adulterinum	14.0772	57.6622	247	124.7
Asplenium_adulterinum	13.6597	46.7792	755	4.7886
Asplenium_adulterinum	13.0117	47.724	1402	49.4462
Asplenium_adulterinum	12.7849	50.0707	739	115.067
Asplenium_adulterinum	12.5316	65.8134	0	5.8813
Asplenium_adulterinum	12.47	49.43	528	44.4002
Asplenium_adulterinum	11.96	50.27	527	45.883
Asplenium_adulterinum	10.7634	63.505	0	0.2758
Asplenium_adulterinum	10.1451	46.2504	1504	39.3775
Asplenium_adulterinum	9.85417	46.2744	979	16.8139
Asplenium_adulterinum	9.40654	44.5077	1037	21.2469
Asplenium_adulterinum	8.49213	46.3167	1629	17.6564
Asplenium_adulterinum	7.6496	62.7212	60	0.7773
Asplenium_adulterinum	7.42642	62.2169	174	1.8892
Asplenium_adulterinum	7.23692	62.2501	215	0.7322
Asplenium_adulterinum	6.9994	62.269	1	0.6471
Asplenium_adulterinum	6.72037	62.714	3	1.0976
Asplenium_adulterinum	6.6027	62.21	260	4.9744
Asplenium_adulterinum	6.4144	62.4277	20	0.1556
Asplenium_adulterinum	6.35549	62.2148	972	7.5503
Asplenium_adulterinum	6.27419	62.5764	20	1.7006
Asplenium_adulterinum	6.2689	60.4016	460	1.0695
Asplenium_adulterinum	6.2313	62.1121	280	2.3729
Asplenium_adulterinum	6.2205	61.7844	460	4.3197
Asplenium_adulterinum	6.0823	61.9952	60	7.8426
Asplenium_adulterinum	6.08188	62.1453	48	2.7203
Asplenium_adulterinum	5.63763	62.0832	584	4.505
Asplenium_adulterinum	5.3904	61.4684	180	1.5144
Asplenium_adulterinum	5.18802	60.7708		3.0786
Asplenium_adulterinum	5.1611	61.9224	140	2.4123
Asplenium_adulterinum	5.11731	62.0079	220	1.6659
Asplenium_adulterinum	-121.657	49.0736	1100	15.5365
Asplenium_adulterinum	-125.433	49.2333	830	17.7182
Asplenium_adulterinum	-125.617	49.6833	1378	35.0869
Asplenium_adulterinum	-125.999	49.7908	685	15.0871
Asplenium_adulterinum	-126.063	49.5617	753	10.2603
Asplenium_adulterinum	-126.617	49.85	904	2.5873
Asplenium_adulterinum	-126.822	50.075	1046	10.3889
Asplenium_aegaeum	24.1833	35.2667	796	6.3082
Asplenium_aegaeum	24.0333	35.3	2120	7.9213
Asplenium_aethiopicum	174.903	-36.8885	25	0.8317
Asplenium_aethiopicum	174.848	-36.8936	46	3.146
Asplenium_aethiopicum	174.804	-36.8907	53	4.0741
Asplenium_aethiopicum	174.773	-36.892	91	4.182
Asplenium_aethiopicum	174.72	-36.8621	23	0.2289
Asplenium_aethiopicum	173.969	-35.2179	36	4.6273
Asplenium_aethiopicum	168.332	-17.5424	27	0.2902
Asplenium_aethiopicum	167.522	-22.5833	9	0.6267
Asplenium_aethiopicum	167.456	-22.6567	47	0.2695
Asplenium_aethiopicum	167.422	-16.229	236	4.2344
Asplenium_aethiopicum	167.117	-20.9833	40	3.493
Asplenium_aethiopicum	166.923	-15.3503	158	19.393
Asplenium_aethiopicum	166.757	-15.3619	1658	12.8463
Asplenium_aethiopicum	166.657	-15.365		3.0727
Asplenium_aethiopicum	166.588	-20.6497	30	1.0483
Asplenium_aethiopicum	166.533	-22.1667	661	6.8596
Asplenium_aethiopicum	166.35	-22.0667	755	8.1281
Asplenium_aethiopicum	166.208	-21.6108	283	1.7372
Asplenium_aethiopicum	166.194	-21.59	86	1.5946
Asplenium_aethiopicum	165.688	-21.5331	461	19.0504
Asplenium_aethiopicum	165.567	-21.45	809	18.6928
Asplenium_aethiopicum	164.383	-20.525	167	10.8772
Asplenium_aethiopicum	164.243	-20.4506	97	7.7691
Asplenium_aethiopicum	161.81	-10.4224		0.0586
Asplenium_aethiopicum	152.733	-28.2167	454	71.4599
Asplenium_aethiopicum	152.626	-28.7401	185	76.3036
Asplenium_aethiopicum	152.567	-3.05	32	0.3096
Asplenium_aethiopicum	152.551	-31.5651	324	27.5449
Asplenium_aethiopicum	152.43	-30.95	222	58.6229
Asplenium_aethiopicum	152.334	-31.2484	445	60.1587
Asplenium_aethiopicum	151.501	-32.4984	132	49.4598
Asplenium_aethiopicum	150.593	-33.2068	546	71.7362
Asplenium_aethiopicum	150.572	-33.8333	255	55.397
Asplenium_aethiopicum	150.551	-33.1984	445	75.8314
Asplenium_aethiopicum	147.75	-9.16667	2201	57.6234
Asplenium_aethiopicum	145.92	-7.17	1793	59.6919
Asplenium_aethiopicum	145.45	-6	2606	24.856
Asplenium_aethiopicum	142.977	-6.05806	1343	52.8669
Asplenium_aethiopicum	142.55	-37.2167	317	115.779
Asplenium_aethiopicum	142.283	-37.2897	329	104.859
Asplenium_aethiopicum	142.217	-37.2	220	111.602
Asplenium_aethiopicum	142.2	-37.3	207	101.498
Asplenium_aethiopicum	141.804	-38.0783	58	18.6512
Asplenium_aethiopicum	141.767	-38.1667	22	9.5231
Asplenium_aethiopicum	136.917	-4.4	155	47.2496
Asplenium_aethiopicum	134.35	7.15	39	7.3043
Asplenium_aethiopicum	130.517	-3.18333	62	7.8361
Asplenium_aethiopicum	129.667	-3.06667	305	20.72
Asplenium_aethiopicum	129.55	-3.26667	440	3.1471
Asplenium_aethiopicum	129.533	-3.23333	1211	6.542
Asplenium_aethiopicum	129.43	-3.18	1955	14.6101
Asplenium_aethiopicum	129.183	-2.96667	430	1.0397
Asplenium_aethiopicum	129.183	-3.03333	1432	7.5894
Asplenium_aethiopicum	128.483	-2.85		0.936
Asplenium_aethiopicum	127.974	0.667528	304	18.5212
Asplenium_aethiopicum	127.925	0.598972	139	12.1242
Asplenium_aethiopicum	126.35	-3.25	856	14.3557
Asplenium_aethiopicum	122.2	-8.75	61	1.6875
Asplenium_aethiopicum	122.117	-34.0167		0.2837
Asplenium_aethiopicum	121.767	24.85	501	5.1321
Asplenium_aethiopicum	121.603	22.0853		3.6884
Asplenium_aethiopicum	121.6	22.02	158	1.1474
Asplenium_aethiopicum	121.583	25.1667	603	7.2853
Asplenium_aethiopicum	121.499	22.0017		3.5469
Asplenium_aethiopicum	121.419	23.9994	745	19.1222
Asplenium_aethiopicum	121.317	23.0167	164	0.0012
Asplenium_aethiopicum	121.247	23.2972	943	16.7172
Asplenium_aethiopicum	121.179	22.8908	904	4.143
Asplenium_aethiopicum	121.05	22.8964	975	15.0035
Asplenium_aethiopicum	121.032	23.1625	1161	31.7928
Asplenium_aethiopicum	121.023	22.7706	417	8.7871
Asplenium_aethiopicum	121	24.2167	1208	44.1185
Asplenium_aethiopicum	120.85	22.5833	484	11.3356
Asplenium_aethiopicum	120.776	22.77	1397	27.4146
Asplenium_aethiopicum	120.75	23.25	1694	59.5986
Asplenium_aethiopicum	120.734	22.7314	1524	29.1743
Asplenium_aethiopicum	120.733	23.5333	973	57.6501
Asplenium_aethiopicum	120.65	23	259	47.4451
Asplenium_aethiopicum	120.566	23.2522	240	41.5658
Asplenium_aethiopicum	119.817	-33.9333	194	4.5909
Asplenium_aethiopicum	119.736	-34.0213	135	1.7046
Asplenium_aethiopicum	118.567	-34.2324	201	35.0331
Asplenium_aethiopicum	118.5	-34.7	195	1.0241
Asplenium_aethiopicum	118.263	-34.8967	446	1.4682
Asplenium_aethiopicum	118.2	-35	140	0.0007
Asplenium_aethiopicum	118.048	-34.3852	745	53.0773
Asplenium_aethiopicum	118.021	-34.9932	115	2.1163
Asplenium_aethiopicum	117.95	-34.67	214	33.8252
Asplenium_aethiopicum	117.933	-35.1167	35	0.3555
Asplenium_aethiopicum	117.851	-34.6656	337	34.8897
Asplenium_aethiopicum	117.847	-34.9438	104	8.1681
Asplenium_aethiopicum	117.5	-35.0167	10	6.5807
Asplenium_aethiopicum	117.342	-34.8444	176	17.3399
Asplenium_aethiopicum	117.261	-35.0155	52	0.0825
Asplenium_aethiopicum	117.232	-34.8546	115	15.7985
Asplenium_aethiopicum	117.042	-34.956	32	6.5167
Asplenium_aethiopicum	117.017	-34.5167	262	50.0154
Asplenium_aethiopicum	116.876	-34.7833	232	24.1584
Asplenium_aethiopicum	116.868	-34.6297	269	39.2364
Asplenium_aethiopicum	116.82	-34.7409	155	27.9494
Asplenium_aethiopicum	116.784	-34.7	257	31.1241
Asplenium_aethiopicum	116.783	-34.8333	186	18.0397
Asplenium_aethiopicum	116.783	-34.9831	177	3.5602
Asplenium_aethiopicum	116.68	-34.7717	220	23.8619
Asplenium_aethiopicum	116.598	-34.7173	213	22.9813
Asplenium_aethiopicum	116.569	-34.9728	88	4.6136
Asplenium_aethiopicum	116.536	-34.6743	188	23.3298
Asplenium_aethiopicum	116.525	-34.8693	112	6.1666
Asplenium_aethiopicum	116.434	-34.7205	123	14.4661
Asplenium_aethiopicum	116.418	-34.4156	168	44.298
Asplenium_aethiopicum	116.132	-34.6349	98	20.6877
Asplenium_aethiopicum	116.092	-34.5167	118	25.5448
Asplenium_aethiopicum	116.085	-34.4155	140	32.5883
Asplenium_aethiopicum	116.083	-34.7667	61	6.9894
Asplenium_aethiopicum	115.953	-34.5924	78	10.6843
Asplenium_aethiopicum	115.938	-34.5081	112	15.7222
Asplenium_aethiopicum	115.863	-34.42	93	16.8172
Asplenium_aethiopicum	115.826	-34.33	97	21.832
Asplenium_aethiopicum	115.085	-33.6261	94	2.8906
Asplenium_aethiopicum	115.083	-33.75	111	9.9743
Asplenium_aethiopicum	115.029	-33.95	68	5.6161
Asplenium_aethiopicum	115.004	-33.8608	67	4.2738
Asplenium_aethiopicum	106.077	21.956	482	68.2109
Asplenium_aethiopicum	102.869	30.5728	1919	74.3906
Asplenium_aethiopicum	101.917	16.8667	265	68.7317
Asplenium_aethiopicum	100.906	5.68417	163	41.8914
Asplenium_aethiopicum	100.267	7.06667	42	18.926
Asplenium_aethiopicum	77.5206	10.4397	342	74.5919
Asplenium_aethiopicum	77.4917	10.225	1982	94.7389
Asplenium_aethiopicum	57.597	-20.278	409	15.7535
Asplenium_aethiopicum	55.7419	-21.3494	417	0.1574
Asplenium_aethiopicum	55.5983	-21.1556	1289	17.5205
Asplenium_aethiopicum	55.5969	-21.0008	711	11.1197
Asplenium_aethiopicum	55.3839	-21.0789	2231	11.536
Asplenium_aethiopicum	55.2259	-4.48744	371	0.2022
Asplenium_aethiopicum	55.2259	-4.8014		19.3589
Asplenium_aethiopicum	54.05	12.5833	1016	7.494
Asplenium_aethiopicum	49.7	-12.9636	443	15.0736
Asplenium_aethiopicum	49.6428	-13.1572	401	29.2736
Asplenium_aethiopicum	49.62	-13.2533	290	32.3921
Asplenium_aethiopicum	49.4617	-14.745	1385	74.6988
Asplenium_aethiopicum	49.2169	-12.59	775	28.8167
Asplenium_aethiopicum	48.9733	-14.1442	2340	74.1533
Asplenium_aethiopicum	48.7844	-17.5089	932	10.1046
Asplenium_aethiopicum	48.7742	-14.0156	728	50.4887
Asplenium_aethiopicum	48.7103	-17.7578	934	26.7147
Asplenium_aethiopicum	48.3	-13.416		0.8109
Asplenium_aethiopicum	48.2833	-18.85	986	56.4095
Asplenium_aethiopicum	48.07	-13.76	407	11.211
Asplenium_aethiopicum	48	-18.3667	1249	20.2761
Asplenium_aethiopicum	47.955	-18.48	1304	32.3508
Asplenium_aethiopicum	47.835	-19.7067	1403	46.0251
Asplenium_aethiopicum	47.805	-19.2719	1519	4.2214
Asplenium_aethiopicum	47.7386	-18.9217	1552	9.6688
Asplenium_aethiopicum	47.3447	-21.8661	796	19.6248
Asplenium_aethiopicum	47.3022	-19.3481	2017	44.8211
Asplenium_aethiopicum	47.2431	-21.3392	1188	57.2547
Asplenium_aethiopicum	47.1983	-20.8186	1644	42.1016
Asplenium_aethiopicum	47.1297	-20.6633	1522	26.6868
Asplenium_aethiopicum	47.1264	-17.9528	1400	23.7788
Asplenium_aethiopicum	46.9978	-20.0733	1415	23.754
Asplenium_aethiopicum	46.9494	-22.4953	1073	53.0713
Asplenium_aethiopicum	46.9167	-22.1833	2083	27.6198
Asplenium_aethiopicum	46.8372	-21.8358	1067	6.1371
Asplenium_aethiopicum	46.8231	-20.0978	1719	16.4274
Asplenium_aethiopicum	46.7342	-24.5853	995	46.8344
Asplenium_aethiopicum	46.7061	-20.5875	1162	31.3239
Asplenium_aethiopicum	46.5444	-20.625	1692	35.4143
Asplenium_aethiopicum	46.4425	-23.4189	1372	40.7351
Asplenium_aethiopicum	46.2011	-22.4214	723	33.0115
Asplenium_aethiopicum	45.5667	-18.95	668	76.4409
Asplenium_aethiopicum	45.1872	-21.3392	519	29.5767
Asplenium_aethiopicum	45.0747	-21.568	353	10.1192
Asplenium_aethiopicum	44.5192	-18.0503	392	49.7121
Asplenium_aethiopicum	44.35	14.1833	2558	115.825
Asplenium_aethiopicum	44.1833	13.8667	2308	91.39
Asplenium_aethiopicum	44.1717	-22.6417	1284	73.1327
Asplenium_aethiopicum	44.05	13.5333	2797	75.6631
Asplenium_aethiopicum	43.9	15.5	2881	109.092
Asplenium_aethiopicum	43.8833	13.4833	2010	59.6978
Asplenium_aethiopicum	43.6759	-11.8928		17.7947
Asplenium_aethiopicum	43.5333	15.4833	2006	73.9618
Asplenium_aethiopicum	43.3167	-11.75	1548	7.4523
Asplenium_aethiopicum	42.5	18.2167	2252	69.5687
Asplenium_aethiopicum	42.1	9.26667	1914	128.624
Asplenium_aethiopicum	42.05	9.51667	1764	149.206
Asplenium_aethiopicum	42.0167	9.4	2016	137.154
Asplenium_aethiopicum	41.9	9.48333	1853	140.987
Asplenium_aethiopicum	41.77	9.4	2171	129.564
Asplenium_aethiopicum	41.75	9.08333	1801	98.3718
Asplenium_aethiopicum	41.75	9.23333	2539	112.882
Asplenium_aethiopicum	41.6667	9.41667	2438	125.177
Asplenium_aethiopicum	41.5667	9.4	2180	117.631
Asplenium_aethiopicum	41.25	9.25	1985	101.264
Asplenium_aethiopicum	40.7833	8.91667	1770	60.9055
Asplenium_aethiopicum	40.1716	6.91923	2721	50.4278
Asplenium_aethiopicum	39.9583	6.9417	3029	50.6987
Asplenium_aethiopicum	39.8933	6.85167	4049	56.1365
Asplenium_aethiopicum	39.7931	7.08301	3246	35.0446
Asplenium_aethiopicum	39.75	9.83333	2828	47.9639
Asplenium_aethiopicum	39.7175	6.74201	2716	52.3394
Asplenium_aethiopicum	39.6667	9.75	3110	55.94
Asplenium_aethiopicum	39.5767	7.03167	3107	20.8299
Asplenium_aethiopicum	39.4	7.83333	3896	43.8579
Asplenium_aethiopicum	39.3	7.78333	2870	44.8139
Asplenium_aethiopicum	39.0333	15.3333	1920	46.5325
Asplenium_aethiopicum	39.0167	9.15	2562	59.1225
Asplenium_aethiopicum	38.8667	9.71667	1991	61.7795
Asplenium_aethiopicum	38.8333	-5.08333	176	25.0399
Asplenium_aethiopicum	38.8167	9.01667	2384	38.6075
Asplenium_aethiopicum	38.78	8.87	2066	24.2835
Asplenium_aethiopicum	38.75	-4.88333	204	36.0193
Asplenium_aethiopicum	38.7389	-5.06139	253	22.8862
Asplenium_aethiopicum	38.3333	-3.41667	1643	95.2563
Asplenium_aethiopicum	38.33	-9.38	349	108.297
Asplenium_aethiopicum	38.33	4.08	1919	93.5075
Asplenium_aethiopicum	38.2952	-4.78984	1437	9.558
Asplenium_aethiopicum	38.2167	-4.7	1947	8.1186
Asplenium_aethiopicum	38.1728	9.0895	2772	8.3554
Asplenium_aethiopicum	38.1566	-4.60093	648	11.1501
Asplenium_aethiopicum	38.1	13.2833	3028	45.4421
Asplenium_aethiopicum	37.9222	-4.25806	2011	30.9479
Asplenium_aethiopicum	37.9167	8.83333	2941	20.9738
Asplenium_aethiopicum	37.8667	8.95	2242	20.9559
Asplenium_aethiopicum	37.85	0.2	1977	48.2193
Asplenium_aethiopicum	37.8383	10.6983	3901	51.5736
Asplenium_aethiopicum	37.7	-5.95833	1189	26.9473
Asplenium_aethiopicum	37.7	8.96667	2502	37.5227
Asplenium_aethiopicum	37.65	0.05	1658	48.3264
Asplenium_aethiopicum	37.625	6.38833	2526	49.5789
Asplenium_aethiopicum	37.6	-7.10833	1869	38.8686
Asplenium_aethiopicum	37.5881	-0.30135	1683	37.8725
Asplenium_aethiopicum	37.5356	-6.0725	1183	25.1189
Asplenium_aethiopicum	37.5333	0.0167	2327	55.5195
Asplenium_aethiopicum	37.53	8.97	2253	34.7353
Asplenium_aethiopicum	37.3	0.166667	2188	58.5691
Asplenium_aethiopicum	37.1667	-0.7333	1239	7.413
Asplenium_aethiopicum	37.0833	-1.05	1496	32.5963
Asplenium_aethiopicum	37	10.5	1997	18.5216
Asplenium_aethiopicum	36.9	9.05	1837	11.9197
Asplenium_aethiopicum	36.8667	-7.78333	1111	13.8068
Asplenium_aethiopicum	36.8667	7.75	2085	60.6692
Asplenium_aethiopicum	36.75	-0.7667	2448	41.2132
Asplenium_aethiopicum	36.75	7.66667	1897	68.374
Asplenium_aethiopicum	36.75	7.81667	1781	74.0979
Asplenium_aethiopicum	36.7333	-3.23333	3202	50.4769
Asplenium_aethiopicum	36.7333	2.16667	1319	247.02
Asplenium_aethiopicum	36.7325	-2.68639	1768	88.3387
Asplenium_aethiopicum	36.6945	9.04383	1806	32.4396
Asplenium_aethiopicum	36.6411	-7.11167	2037	28.1369
Asplenium_aethiopicum	36.6333	-3.31667	1487	57.4013
Asplenium_aethiopicum	36.6333	-1.4	1988	88.5156
Asplenium_aethiopicum	36.5833	-0.25	3240	15.5786
Asplenium_aethiopicum	36.5808	-6.82639	1843	23.8753
Asplenium_aethiopicum	36.5632	7.53717	2101	82.0113
Asplenium_aethiopicum	36.45	-7.75	1813	25.5223
Asplenium_aethiopicum	36.4113	-0.45791	2199	31.1472
Asplenium_aethiopicum	36.3281	-0.762611	1881	55.7786
Asplenium_aethiopicum	36.2667	-0.2	2689	46.1946
Asplenium_aethiopicum	36.25	-7.66667	1013	31.4604
Asplenium_aethiopicum	36.25	7.38333	1721	75.6479
Asplenium_aethiopicum	36.2333	7.26667	1621	65.0117
Asplenium_aethiopicum	36.2092	-2.91917	2281	111.392
Asplenium_aethiopicum	36.1667	-7.5	2103	24.009
Asplenium_aethiopicum	36.1519	-0.03643	1983	63.4608
Asplenium_aethiopicum	36.1044	-3.42417	1697	108.969
Asplenium_aethiopicum	36.0667	-0.2	1962	65.4327
Asplenium_aethiopicum	35.9167	-8.05	1975	81.3882
Asplenium_aethiopicum	35.85	-8.58333	1193	113.554
Asplenium_aethiopicum	35.8333	-1.66667	2524	157.816
Asplenium_aethiopicum	35.8	0.316667	2053	112.255
Asplenium_aethiopicum	35.6	-3.35	1538	159.654
Asplenium_aethiopicum	35.5833	6.18333	2350	36.2756
Asplenium_aethiopicum	35.5	-8.5	1756	96.2997
Asplenium_aethiopicum	35.3922	-4.46417	2450	105.66
Asplenium_aethiopicum	35.3167	-8.55	1928	86.4081
Asplenium_aethiopicum	35.2833	-0.366667	1980	142.031
Asplenium_aethiopicum	35.1833	-0.583333	1932	153.799
Asplenium_aethiopicum	35.1	1.26667	2043	200.906
Asplenium_aethiopicum	34.95	-0.616667	1946	177.369
Asplenium_aethiopicum	34.75	1.08333	2413	161.426
Asplenium_aethiopicum	34.7333	1.21667	2131	166.067
Asplenium_aethiopicum	34.6667	7.83333	508	78.4646
Asplenium_aethiopicum	34.6667	9.91667	1465	70.9961
Asplenium_aethiopicum	34.633	-9.883	2055	47.6087
Asplenium_aethiopicum	34.6167	0.55	1456	133.703
Asplenium_aethiopicum	34.6	-9.98333	1917	57.2064
Asplenium_aethiopicum	34.2982	-8.16796	1119	20.1036
Asplenium_aethiopicum	34.2333	-0.2	1170	110.437
Asplenium_aethiopicum	34.15	0.616667	1189	88.8957
Asplenium_aethiopicum	34.0556	-18.4555	1365	36.7986
Asplenium_aethiopicum	34.0333	-11.4333	1295	116.36
Asplenium_aethiopicum	33.8568	-10.6708	2244	93.4533
Asplenium_aethiopicum	33.85	-10.5333	2240	87.234
Asplenium_aethiopicum	33.75	-10.7833	1833	89.1579
Asplenium_aethiopicum	33.7	-9	2335	60.2138
Asplenium_aethiopicum	33.6833	-10.55	1902	72.7744
Asplenium_aethiopicum	33.5405	-9.17118	1356	68.743
Asplenium_aethiopicum	33.5333	-9.65	1545	37.8961
Asplenium_aethiopicum	33.45	-10.1333	1918	35.7341
Asplenium_aethiopicum	33.0835	-19.5846	618	71.6425
Asplenium_aethiopicum	33.027	-19.7438	1560	63.0858
Asplenium_aethiopicum	32.875	-19.125	767	67.6527
Asplenium_aethiopicum	32.8351	-19.3978	1865	57.7587
Asplenium_aethiopicum	32.8333	-18.2667	2144	24.9416
Asplenium_aethiopicum	32.7931	-18.48	1683	30.8462
Asplenium_aethiopicum	32.7667	-18.1667	2245	35.1907
Asplenium_aethiopicum	32.7403	-18.2845	1805	33.5354
Asplenium_aethiopicum	32.7383	-19.0902	1557	68.3345
Asplenium_aethiopicum	32.6667	-18.9667	1115	67.5505
Asplenium_aethiopicum	32.6488	-18.3697	1904	42.2165
Asplenium_aethiopicum	32.5	0.433333	1164	58.893
Asplenium_aethiopicum	31.875	-27.625	192	22.1716
Asplenium_aethiopicum	31.875	-26.375	311	66.2985
Asplenium_aethiopicum	31.6333	-11.5	1696	76.0443
Asplenium_aethiopicum	31.625	-25.375	297	104.333
Asplenium_aethiopicum	31.6178	-1.01972	1200	0.0977
Asplenium_aethiopicum	31.5167	-9.05	1604	20.879
Asplenium_aethiopicum	31.4333	-8.45	1619	66.5288
Asplenium_aethiopicum	31.375	-26.875	835	54.1976
Asplenium_aethiopicum	31.2697	-26.4189	853	93.9073
Asplenium_aethiopicum	31.1725	-26.2375	1060	97.6731
Asplenium_aethiopicum	31.1669	-26.6317	1274	71.1699
Asplenium_aethiopicum	31.125	-27.625	1056	20.5732
Asplenium_aethiopicum	31.125	-28.625	973	22.0634
Asplenium_aethiopicum	31.125	-25.875	1376	108.384
Asplenium_aethiopicum	31.125	-25.125	712	159.53
Asplenium_aethiopicum	31.125	-25.375	756	140.216
Asplenium_aethiopicum	31.1192	-26.1172	1354	96.7931
Asplenium_aethiopicum	31.1167	-26.5	1074	83.7259
Asplenium_aethiopicum	31.0422	-26.8258	1055	50.5557
Asplenium_aethiopicum	30.9981	-26.4119	1315	76.9732
Asplenium_aethiopicum	30.8942	-25.2258	1009	138.188
Asplenium_aethiopicum	30.875	-25.875	1196	87.6198
Asplenium_aethiopicum	30.875	-24.875	1555	168.016
Asplenium_aethiopicum	30.875	-25.625	883	104.924
Asplenium_aethiopicum	30.875	-25.125	1404	145.931
Asplenium_aethiopicum	30.875	-25.375	925	124.638
Asplenium_aethiopicum	30.875	-22.625	639	33.2848
Asplenium_aethiopicum	30.875	-24.6917	1397	184.651
Asplenium_aethiopicum	30.8569	-24.9617	1433	159.456
Asplenium_aethiopicum	30.8472	-16.581	1240	89.8648
Asplenium_aethiopicum	30.7217	-24.7775	1901	170.97
Asplenium_aethiopicum	30.7041	-13.1543	1482	62.5291
Asplenium_aethiopicum	30.6586	2.17306	1715	32.8968
Asplenium_aethiopicum	30.625	-29.875	566	31.8134
Asplenium_aethiopicum	30.625	-27.375	1156	2.1497
Asplenium_aethiopicum	30.625	-25.375	1291	112.117
Asplenium_aethiopicum	30.625	-24.875	1526	158.598
Asplenium_aethiopicum	30.6206	-24.4342	528	165.459
Asplenium_aethiopicum	30.55	-3.1	1583	14.8201
Asplenium_aethiopicum	30.5169	-25.2664	1840	118.05
Asplenium_aethiopicum	30.5	-5.43	1632	25.8447
Asplenium_aethiopicum	30.4833	-8.6	951	96.7743
Asplenium_aethiopicum	30.4833	-0.3	1685	74.575
Asplenium_aethiopicum	30.4333	-0.4	1585	66.0699
Asplenium_aethiopicum	30.375	-29.875	946	52.9385
Asplenium_aethiopicum	30.375	-27.375	1629	4.5312
Asplenium_aethiopicum	30.375	-25.375	1184	103.654
Asplenium_aethiopicum	30.375	-24.125	665	139.688
Asplenium_aethiopicum	30.375	-24.625	786	144.788
Asplenium_aethiopicum	30.3667	-16.8667	1028	121.502
Asplenium_aethiopicum	30.328	-20.6226	1273	103.012
Asplenium_aethiopicum	30.2231	-5.92944	1306	69.4137
Asplenium_aethiopicum	30.125	-31.125	128	2.2735
Asplenium_aethiopicum	30.125	-28.125	1352	53.4316
Asplenium_aethiopicum	30.125	-23.625	764	127.304
Asplenium_aethiopicum	30.125	-24.625	939	120.594
Asplenium_aethiopicum	30.125	-25.625	1856	75.8378
Asplenium_aethiopicum	30.1237	-12.5219	1181	48.8484
Asplenium_aethiopicum	30.025	-23.7175	1370	114.362
Asplenium_aethiopicum	29.9589	-25.1711	1643	122.49
Asplenium_aethiopicum	29.8892	-27.3164	1956	48.6188
Asplenium_aethiopicum	29.8833	-22.9958	1576	74.6008
Asplenium_aethiopicum	29.875	-30.875	810	37.5003
Asplenium_aethiopicum	29.875	-29.375	1469	65.0369
Asplenium_aethiopicum	29.875	-29.625	1588	89.651
Asplenium_aethiopicum	29.875	-25.625	1549	80.1577
Asplenium_aethiopicum	29.875	-23.125	928	87.1167
Asplenium_aethiopicum	29.8	-1.38333	1989	18.6895
Asplenium_aethiopicum	29.8	-4.08333	1600	44.0664
Asplenium_aethiopicum	29.75	-2.06667	1853	87.0768
Asplenium_aethiopicum	29.75	-3.96667	1889	42.3161
Asplenium_aethiopicum	29.7333	-1.55	1878	36.5001
Asplenium_aethiopicum	29.7333	-2.56667	1723	44.0423
Asplenium_aethiopicum	29.7047	-29.7072	1436	83.0372
Asplenium_aethiopicum	29.6758	-27.9567	1964	70.6862
Asplenium_aethiopicum	29.6678	-29.5086	1825	70.8474
Asplenium_aethiopicum	29.6333	-29.3803	1868	63.2673
Asplenium_aethiopicum	29.6333	-4.68333	1014	19.8015
Asplenium_aethiopicum	29.625	-30.625	1583	72.6278
Asplenium_aethiopicum	29.625	-30.875	1111	55.9605
Asplenium_aethiopicum	29.625	-29.875	1580	83.9129
Asplenium_aethiopicum	29.6167	-1.41667	2390	21.7627
Asplenium_aethiopicum	29.6	-2.93333	2035	5.1385
Asplenium_aethiopicum	29.5833	-3.51667	2175	35.8073
Asplenium_aethiopicum	29.5667	-3.16667	2358	16.5797
Asplenium_aethiopicum	29.55	-3.35	2146	32.0831
Asplenium_aethiopicum	29.5333	-2.48333	2050	50.4577
Asplenium_aethiopicum	29.5167	-1.66667	2384	43.6206
Asplenium_aethiopicum	29.5	-3.25	1350	26.0174
Asplenium_aethiopicum	29.4917	-29.4194	1751	51.2637
Asplenium_aethiopicum	29.4833	-1.48333	3200	25.2831
Asplenium_aethiopicum	29.4364	-29.1197	1512	37.7187
Asplenium_aethiopicum	29.4333	-2.31667	2014	58.1081
Asplenium_aethiopicum	29.4139	-29.0042	1386	27.1778
Asplenium_aethiopicum	29.4036	-30.4794	1801	86.3166
Asplenium_aethiopicum	29.3922	-3.08167	1075	15.2804
Asplenium_aethiopicum	29.3919	-2.91778	1692	20.2206
Asplenium_aethiopicum	29.3833	-13.6167	1253	116.591
Asplenium_aethiopicum	29.375	-30.875	1382	68.7936
Asplenium_aethiopicum	29.375	-28.375	1693	29.199
Asplenium_aethiopicum	29.375	-28.875	1201	13.6884
Asplenium_aethiopicum	29.375	-29.625	2150	51.6974
Asplenium_aethiopicum	29.375	-25.875	1530	91.4136
Asplenium_aethiopicum	29.375	-23.125	945	68.5123
Asplenium_aethiopicum	29.375	-25.375	1004	99.3923
Asplenium_aethiopicum	29.365	-2.60083	2470	36.6386
Asplenium_aethiopicum	29.35	-2.25	2361	52.7456
Asplenium_aethiopicum	29.3422	-29.7458	1958	56.3008
Asplenium_aethiopicum	29.2858	-2.48	2399	36.2311
Asplenium_aethiopicum	29.2264	-28.9611	1607	20.18
Asplenium_aethiopicum	29.125	-30.875	1063	84.8518
Asplenium_aethiopicum	29.125	-28.875	1822	17.0226
Asplenium_aethiopicum	29.125	-28.625	1197	1.6109
Asplenium_aethiopicum	29.0769	-28.3322	1659	29.6383
Asplenium_aethiopicum	29.0522	-28.5547	1902	7.7151
Asplenium_aethiopicum	28.8897	-28.7239	2334	13.1948
Asplenium_aethiopicum	28.875	-23.125	1385	19.824
Asplenium_aethiopicum	28.875	-24.125	1536	5.1379
Asplenium_aethiopicum	28.8667	-2.5	1473	0.0457
Asplenium_aethiopicum	28.7608	-20.4435	1455	9.9277
Asplenium_aethiopicum	28.7583	-26.7364	1687	24.224
Asplenium_aethiopicum	28.7083	-8.71667	943	14.1443
Asplenium_aethiopicum	28.7	-2.26667	2293	27.3413
Asplenium_aethiopicum	28.6742	-30.3989	1515	36.6224
Asplenium_aethiopicum	28.625	-31.375	833	79.1808
Asplenium_aethiopicum	28.625	-30.125	1962	8.7957
Asplenium_aethiopicum	28.6067	-27.9481	1683	81.5149
Asplenium_aethiopicum	28.5972	-8.82222	1035	18.4605
Asplenium_aethiopicum	28.5861	-8.55833	993	26.2984
Asplenium_aethiopicum	28.5472	-27.5392	1577	48.0886
Asplenium_aethiopicum	28.5	-8.67083	1054	34.5534
Asplenium_aethiopicum	28.4611	-8.49722	985	35.6393
Asplenium_aethiopicum	28.4331	-30.7508	1434	70.021
Asplenium_aethiopicum	28.38	-2.15	1654	59.278
Asplenium_aethiopicum	28.375	-31.375	1288	97.4974
Asplenium_aethiopicum	28.375	-26.375	1604	49.7286
Asplenium_aethiopicum	28.3667	-7.76667	945	6.2035
Asplenium_aethiopicum	28.287	-12.5475	1303	13.8767
Asplenium_aethiopicum	28.15	-7.66667	639	0.5924
Asplenium_aethiopicum	28.125	-31.125	1408	86.9013
Asplenium_aethiopicum	28.125	-26.625	1560	14.8284
Asplenium_aethiopicum	28.125	-24.625	1395	22.5784
Asplenium_aethiopicum	27.95	-10.55	1602	46.1963
Asplenium_aethiopicum	27.9225	-28.9064	1610	3.0572
Asplenium_aethiopicum	27.875	-25.875	1444	79.6081
Asplenium_aethiopicum	27.875	-26.125	1628	54.8092
Asplenium_aethiopicum	27.875	-29.375	1950	35.6562
Asplenium_aethiopicum	27.875	-25.625	1168	96.197
Asplenium_aethiopicum	27.85	-10.55	1709	36.3111
Asplenium_aethiopicum	27.7811	-31.5639	1490	66.7982
Asplenium_aethiopicum	27.7394	-29.4806	1754	30.4707
Asplenium_aethiopicum	27.625	-29.375	1552	14.9602
Asplenium_aethiopicum	27.625	-24.375	1460	78.1674
Asplenium_aethiopicum	27.4333	-32.5833	828	34.324
Asplenium_aethiopicum	27.375	-32.375	1047	21.2586
Asplenium_aethiopicum	27.375	-29.125	1737	17.2214
Asplenium_aethiopicum	27.375	-29.375	1606	3.2621
Asplenium_aethiopicum	27.375	-26.375	1536	41.6684
Asplenium_aethiopicum	27.375	-28.375	1424	65.0491
Asplenium_aethiopicum	27.3061	-28.9328	1777	34.8103
Asplenium_aethiopicum	27.2833	-11.3	1360	34.9856
Asplenium_aethiopicum	27.2667	-32.6833	1158	51.152
Asplenium_aethiopicum	27.1328	-32.2856	1369	12.1934
Asplenium_aethiopicum	27.125	-28.375	1406	81.9535
Asplenium_aethiopicum	27.125	-28.875	1424	52.2298
Asplenium_aethiopicum	27.125	-25.625	1365	94.5472
Asplenium_aethiopicum	27.125	-25.125	1092	69.9623
Asplenium_aethiopicum	26.9697	-31.5367	1456	50.1894
Asplenium_aethiopicum	26.9417	-32.5917	1170	47.1113
Asplenium_aethiopicum	26.875	-28.625	1356	86.7011
Asplenium_aethiopicum	26.875	-29.125	1534	51.0401
Asplenium_aethiopicum	26.6167	-2.56667	593	72.0308
Asplenium_aethiopicum	26.5983	-31.5053	1815	46.5166
Asplenium_aethiopicum	26.5953	-32.4969	1634	35.6622
Asplenium_aethiopicum	26.5239	-32.5814	1158	42.0408
Asplenium_aethiopicum	26.4992	-33.3286	685	38.8146
Asplenium_aethiopicum	26.4331	-32.7164	1136	55.2063
Asplenium_aethiopicum	26.4	-12.2333	1348	51.3116
Asplenium_aethiopicum	26.3744	-32.3872	1494	23.9526
Asplenium_aethiopicum	26.2219	-32.4278	1286	35.4899
Asplenium_aethiopicum	26.1667	-9.8	1523	60.2997
Asplenium_aethiopicum	26.05	-10.2333	1611	48.6369
Asplenium_aethiopicum	25.6297	-32.6931	1082	97.3218
Asplenium_aethiopicum	25.4	-10.5	1243	3.7213
Asplenium_aethiopicum	25.375	-31.625	1197	100.05
Asplenium_aethiopicum	24.7597	-33.9253	259	12.3292
Asplenium_aethiopicum	24.625	-33.625	607	2.6668
Asplenium_aethiopicum	24.375	-34.125		1.9115
Asplenium_aethiopicum	24.3333	12.9833	2751	245.019
Asplenium_aethiopicum	24.1667	12.95	1693	232.527
Asplenium_aethiopicum	24.125	-34.125		7.2916
Asplenium_aethiopicum	23.9014	-32.3489	1508	80.8106
Asplenium_aethiopicum	23.375	-34.125		1.7546
Asplenium_aethiopicum	22.875	-33.875	511	13.8713
Asplenium_aethiopicum	22.7958	-9.43056	929	80.9801
Asplenium_aethiopicum	22.6444	-9.21389	908	79.3258
Asplenium_aethiopicum	22.625	-33.875	529	11.9302
Asplenium_aethiopicum	22.625	-33.625	1184	36.8651
Asplenium_aethiopicum	22.375	-33.875	664	18.649
Asplenium_aethiopicum	22.2764	-34.0433	71	1.4353
Asplenium_aethiopicum	22.125	-33.375	867	31.9025
Asplenium_aethiopicum	21.125	-33.875	435	49.2902
Asplenium_aethiopicum	20.875	-33.875	545	48.6926
Asplenium_aethiopicum	20.625	-34.375	72	6.7437
Asplenium_aethiopicum	19.375	-34.375	568	8.0834
Asplenium_aethiopicum	19.125	-34.125	889	17.0021
Asplenium_aethiopicum	19.125	-33.125	789	10.4119
Asplenium_aethiopicum	18.875	-34.375		1.2481
Asplenium_aethiopicum	18.875	-33.875	261	22.7245
Asplenium_aethiopicum	18.8167	-33.35	353	46.2772
Asplenium_aethiopicum	16.5667	-11.5833	1520	84.3414
Asplenium_aethiopicum	16.125	-20.125	1273	265.179
Asplenium_aethiopicum	15.375	-12.875	1566	80.1076
Asplenium_aethiopicum	15.1833	-12.4667	2388	97.9801
Asplenium_aethiopicum	15.05	3.51	536	54.24
Asplenium_aethiopicum	14.3	6.76	1015	12.887
Asplenium_aethiopicum	13.98	6.66	942	2.4063
Asplenium_aethiopicum	13.9633	7.3568	1435	15.7544
Asplenium_aethiopicum	13.91	6.85	947	17.8235
Asplenium_aethiopicum	13.4833	-14.75	1959	119.47
Asplenium_aethiopicum	13.3167	-14.9269	2161	105.874
Asplenium_aethiopicum	13.25	8.35	1582	54.0267
Asplenium_aethiopicum	12.81	7.41	1173	69.084
Asplenium_aethiopicum	12.65	7.36	1109	71.2858
Asplenium_aethiopicum	11.36	3.85	788	43.5758
Asplenium_aethiopicum	11.36	4.75	434	1.1241
Asplenium_aethiopicum	11.01	6.45	1529	53.6933
Asplenium_aethiopicum	10.91	5.71	1136	29.3571
Asplenium_aethiopicum	10.6667	1.7167	655	7.2212
Asplenium_aethiopicum	10.6167	5.55	1218	51.7974
Asplenium_aethiopicum	10.61	6.36	1748	76.2504
Asplenium_aethiopicum	10.5167	6.18333	2742	77.8649
Asplenium_aethiopicum	10.43	6.25	2393	88.1144
Asplenium_aethiopicum	10.4167	1.54167	616	16.4475
Asplenium_aethiopicum	10.37	5.33	1651	70.7603
Asplenium_aethiopicum	10.1	5.82	1720	110.087
Asplenium_aethiopicum	10.0667	5.41667	1414	101.686
Asplenium_aethiopicum	9.88	6.11	1582	139.156
Asplenium_aethiopicum	9.85023	5.03484	2058	90.4223
Asplenium_aethiopicum	9.7	4.82	1268	68.6485
Asplenium_aethiopicum	9.23333	4.26667	2658	24.7298
Asplenium_aethiopicum	9.08333	4.13333	1375	7.9685
Asplenium_aethiopicum	8.93	5.38	462	65.3207
Asplenium_aethiopicum	8.78333	3.6	2358	11.6041
Asplenium_aethiopicum	8.7	3.5	1142	9.5092
Asplenium_aethiopicum	6.61667	8.3	48	0.6367
Asplenium_aethiopicum	6.54214	0.27095	1767	5.5535
Asplenium_aethiopicum	0.974362	-0.689962		118.785
Asplenium_aethiopicum	0.71	7.55	510	51.6905
Asplenium_aethiopicum	0.58405	6.95417	622	36.9743
Asplenium_aethiopicum	-8.39698	7.69907	784	16.853
Asplenium_aethiopicum	-9.28	29.7561	1222	49.9604
Asplenium_aethiopicum	-16.1792	28.557	711	1.3757
Asplenium_aethiopicum	-17.1042	32.6811	35	1.0204
Asplenium_aethiopicum	-17.8325	28.8186	531	1.8902
Asplenium_aethiopicum	-17.8642	28.6571	803	7.1927
Asplenium_aethiopicum	-18.0067	27.7536	347	3.1905
Asplenium_aethiopicum	-23.6327	15.1162	325	6.6952
Asplenium_aethiopicum	-25.033	17.1	1403	4.2235
Asplenium_aethiopicum	-25.1654	17.0601	987	7.9826
Asplenium_aethiopicum	-149.25	-17.7833	628	5.8607
Asplenium_aethiopicum	-149.5	-17.6	1224	10.2936
Asplenium_aethiopicum	-155.3	19.5	1520	23.5828
Asplenium_aethiopicum	-156.217	20.6667	1319	4.2737
Asplenium_aethiopicum	-156.266	20.7576	1952	14.5431
Asplenium_aethiopicum	-156.283	20.65	1289	5.3899
Asplenium_aethiopicum	-156.6	20.8667	1001	5.3876
Asplenium_aethiopicum	-156.881	21.1564	94	0.9291
Asplenium_aethiopicum	-157.023	21.1444	302	3.993
Asplenium_aethiopicum	-158	21		30.5681
Asplenium_aethiopicum	-158.097	21.4418	694	7.7012
Asplenium_aethiopicum	-159.614	22.08	943	10.4639
Asplenium_aethiopicum	-159.66	22.1183	1112	5.1664
Asplenium_aethiopicum	-159.67	22.166	0	0.3026
Asplenium_aethiopicum	-176.171	-13.325		1.296
Asplenium_aethiopicum	-176.192	-13.2083		2.4744
Asplenium_aethiopicum	-178.025	-14.3333	42	0.2478
Asplenium_aethiopicum	-178.058	-14.2833		2.0689
Asplenium_aethiopicum	-178.167	-14.2292		0.6626
Asplenium_aethiopicum	-178.183	-14.2167		1.6785
Asplenium_affine	178.25	-17.83	256	30.3238
Asplenium_affine	162.05	-10.6	150	12.2036
Asplenium_affine	161.821	-10.5734	770	12.7318
Asplenium_affine	160.8	-8.83	570	5.7568
Asplenium_affine	160.67	-9.63		0.7874
Asplenium_affine	160.1	-9.67	999	15.3506
Asplenium_affine	159.73	-9.37	485	9.8199
Asplenium_affine	157.08	-8	1152	11.3005
Asplenium_affine	154.18	-11.37	257	3.4883
Asplenium_affine	152.7	-10.65		0.573
Asplenium_affine	150.8	-9.41667	83	0.8403
Asplenium_affine	150.783	-9.75	602	2.9976
Asplenium_affine	150.6	-9.58	446	5.594
Asplenium_affine	148.298	-9.30981	1329	37.8079
Asplenium_affine	148.273	-9.28583	715	38.2364
Asplenium_affine	147.75	-9.17	2201	57.4087
Asplenium_affine	147.42	-9.42	472	16.1882
Asplenium_affine	147	-5.33333		0.9361
Asplenium_affine	146.88	-6.7	18	9.5087
Asplenium_affine	146.75	-7.33	963	36.5514
Asplenium_affine	146.667	-7.33333	1759	44.0805
Asplenium_affine	146.62	-7.15	617	38.8841
Asplenium_affine	146.62	-6.83	454	32.22
Asplenium_affine	146.17	-7.33	1612	69.4276
Asplenium_affine	146.08	-6.17	552	11.3733
Asplenium_affine	145.97	-4.38		14.9081
Asplenium_affine	145.417	-5.16667	90	34.9078
Asplenium_affine	144.05	-5.75	3719	57.5495
Asplenium_affine	136.299	-1.79861	682	7.2143
Asplenium_affine	134.08	-0.85	163	4.1006
Asplenium_affine	130.17	-1.85	111	12.1546
Asplenium_affine	129.767	-3.28333	309	3.6923
Asplenium_affine	129.758	-3.21667	1005	10.2396
Asplenium_affine	129.667	-3.06667	305	20.72
Asplenium_affine	129.642	-3.29167	185	1.5922
Asplenium_affine	129.6	-3.2	1062	10.2877
Asplenium_affine	129.583	-3.16667	859	13.4342
Asplenium_affine	129.575	-3.13333	840	16.6656
Asplenium_affine	129.55	-3.08333	1506	21.4511
Asplenium_affine	129.533	-3.225	1412	7.3679
Asplenium_affine	129.483	-3.26667	198	4.4441
Asplenium_affine	129.475	-3.15	1518	15.6383
Asplenium_affine	129.45	-3.1	586	21.1096
Asplenium_affine	129.442	-3.05833	450	21.8594
Asplenium_affine	129.43	-3.18	1955	14.6101
Asplenium_affine	129.4	-3.01667	127	16.5155
Asplenium_affine	129.183	-2.99167	759	3.4539
Asplenium_affine	128.45	-3.23333	384	13.6235
Asplenium_affine	128.017	-3.3	525	3.6788
Asplenium_affine	126.535	-3.21031	1091	14.3664
Asplenium_affine	126.232	-3.1436	18	0.0845
Asplenium_affine	126.169	6.73253	906	7.2477
Asplenium_affine	125.249	7.4544	1198	20.8019
Asplenium_affine	124.928	8.08272	1747	23.3661
Asplenium_affine	124.667	9.20813	1113	2.1303
Asplenium_affine	121.48	14.07	1833	20.3982
Asplenium_affine	121.375	-2.625	458	32.365
Asplenium_affine	120.154	-1.23519	1625	33.7607
Asplenium_affine	120.057	-1.50983	854	58.7487
Asplenium_affine	120	-1	528	19.8185
Asplenium_affine	118.27	4.95		3.2052
Asplenium_affine	116.333	1.16667	345	93.4973
Asplenium_affine	115.979	-1.40972	704	44.5795
Asplenium_affine	115.9	4.08	818	76.6775
Asplenium_affine	115.833	0.666667	323	40.9249
Asplenium_affine	115.78	4.05	999	67.9418
Asplenium_affine	115.75	3.75	1000	41.424
Asplenium_affine	115.73	-1.82	1117	49.3357
Asplenium_affine	115.62	-2.72	1360	52.5615
Asplenium_affine	115.583	3.91667	1455	48.422
Asplenium_affine	114.916	4.083	1104	48.1869
Asplenium_affine	114.83	3.92	652	36.3403
Asplenium_affine	114.8	4.03	36	35.5395
Asplenium_affine	113.033	-1.11667	85	101.238
Asplenium_affine	112.649	-0.601694	746	70.9741
Asplenium_affine	109.52	18.78	347	44.5708
Asplenium_affine	108.717	12.1833	1695	45.2333
Asplenium_affine	108.683	12.116	1820	48.0357
Asplenium_affine	104.146	2.77633	628	1.9352
Asplenium_affine	102.533	-0.766667	112	32.9796
Asplenium_affine	102.17	28.54	1773	23.9794
Asplenium_affine	102.08	2.83	912	39.0675
Asplenium_affine	101.893	5.28583	1026	46.9309
Asplenium_affine	101.78	3.43	1469	50.6794
Asplenium_affine	101.555	5.17883	1180	33.2659
Asplenium_affine	99.8	6.37	213	5.18
Asplenium_affine	98.9268	23.6205	1512	27.8138
Asplenium_affine	98.5	8.41667	53	7.346
Asplenium_affine	97.7833	3.56667	349	62.1936
Asplenium_affine	97.6486	3.6831	419	60.2013
Asplenium_affine	97.1581	3.74806	2699	25.6766
Asplenium_affine	80.93	6.775	1389	37.6542
Asplenium_affine	77.57	-37.83	412	0.7935
Asplenium_affine	57.6928	-20.3364	170	4.5717
Asplenium_affine	57.4725	-20.4411	719	7.0447
Asplenium_affine	55.7428	-21.3586	55	0.7612
Asplenium_affine	55.5736	-21.1242	1343	18.3718
Asplenium_affine	55.5203	-20.975	1146	10.0021
Asplenium_affine	55.375	-21.125	1983	8.8564
Asplenium_affine	49.9667	-15.6833	288	0.4434
Asplenium_affine	49.7925	-14.4514	285	39.6909
Asplenium_affine	49.505	-14.755	980	70.4741
Asplenium_affine	49.3797	-14.1639	958	78.306
Asplenium_affine	49.2947	-14.3261	1249	87.5597
Asplenium_affine	49.1964	-12.6	997	27.4271
Asplenium_affine	48.9953	-17.6856	622	33.5072
Asplenium_affine	48.7844	-17.5089	932	10.1056
Asplenium_affine	48.7589	-17.6761	1046	26.3417
Asplenium_affine	48.316	-14.033	1170	23.2178
Asplenium_affine	47.4208	-21.2639	988	74.2211
Asplenium_affine	47.3467	-21.7767	1035	25.9307
Asplenium_affine	47.2833	-18.1667	1583	33.2118
Asplenium_affine	47.1619	-24.5331	396	11.9347
Asplenium_affine	47.0369	-23.7259	776	52.0902
Asplenium_affine	47.0247	-22.2222	829	25.4516
Asplenium_affine	46.9683	-22.4833	1019	51.2219
Asplenium_affine	46.7756	-24.6319	455	40.9948
Asplenium_affine	45.1583	-12.875	333	2.9236
Asplenium_affine	44.425	-12.2153	1245	5.3917
Asplenium_affine	43.7094	-12.3211	678	3.7712
Asplenium_affine	43.3397	-11.4636	965	5.392
Asplenium_affine	43.3167	-11.75	1548	7.4525
Asplenium_affine	-74.3756	-9.16376	164	0.5297
Asplenium_affine	-138.68	-10.5		1.0122
Asplenium_affine	-139.08	-9.8	1040	2.5747
Asplenium_affine	-140.13	-9.67		22.5558
Asplenium_alatum	-44.5667	-22.25	1632	15.0085
Asplenium_alatum	-44.6033	-22.4336	1086	7.8568
Asplenium_alatum	-47.3444	-24.0311	548	46.3338
Asplenium_alatum	-48.3939	-24.6467	576	5.0557
Asplenium_alatum	-48.4192	-24.2775	873	25.1332
Asplenium_alatum	-48.5654	-24.4176	645	14.2049
Asplenium_alatum	-48.6833	-25.3	83	7.631
Asplenium_alatum	-48.6933	-24.5394	367	10.9817
Asplenium_alatum	-49.1781	-27.9739	386	46.7611
Asplenium_alatum	-49.2851	-25.1663	915	28.8912
Asplenium_alatum	-49.4994	-28.2603	554	33.2641
Asplenium_alatum	-49.68	-26.82	436	100.288
Asplenium_alatum	-49.8386	-26.6822	380	110.669
Asplenium_alatum	-50.1292	-26.9086	694	131.836
Asplenium_alatum	-50.2807	-29.5788	66	33.3093
Asplenium_alatum	-50.3241	-29.5053	524	40.7456
Asplenium_alatum	-50.4892	-26.4597	872	121.115
Asplenium_alatum	-50.5342	-24.3369	802	78.0072
Asplenium_alatum	-50.7069	-24.1006	681	75.4665
Asplenium_alatum	-53.8667	-26.45	711	67.0003
Asplenium_alatum	-64.692	-17.688	1749	50.456
Asplenium_alatum	-64.7125	-17.8156	2266	53.3121
Asplenium_alatum	-64.7183	-17.2897	564	28.0836
Asplenium_alatum	-68.1942	-14.4708	1649	63.9097
Asplenium_alatum	-68.2967	-14.5244	1991	71.0837
Asplenium_alatum	-68.7903	-14.5811	1105	111.566
Asplenium_alatum	-68.9965	-14.7713	2505	125.849
Asplenium_alatum	-70.15	9.53333	2126	90.8961
Asplenium_alatum	-70.2875	9.1586	2163	79.1151
Asplenium_alatum	-71.4642	18.4127	-24	39.1489
Asplenium_alatum	-71.5476	18.6545	2013	58.0971
Asplenium_alatum	-71.5833	-13.3	3416	57.3567
Asplenium_alatum	-71.77	18.67	1697	51.1272
Asplenium_alatum	-72.2167	18.3167	1571	9.1582
Asplenium_alatum	-72.3167	-13.5	3663	14.982
Asplenium_alatum	-72.5	-12.5	2055	46.1938
Asplenium_alatum	-72.5456	-13.1633	2186	36.5742
Asplenium_alatum	-72.9345	7.04913	2487	93.5671
Asplenium_alatum	-73.9322	5.61917	2324	70.4692
Asplenium_alatum	-73.9667	10.9833	1793	26.9006
Asplenium_alatum	-74.0181	4.7825	2755	18.4223
Asplenium_alatum	-74.2953	4.90333	2404	44.1152
Asplenium_alatum	-74.3427	4.98156	1521	38.6077
Asplenium_alatum	-75.1675	4.82749	2598	35.5437
Asplenium_alatum	-75.2167	-10.25	322	84.8952
Asplenium_alatum	-75.3153	-10.6767	2332	103.75
Asplenium_alatum	-75.3925	-10.5811	1835	92.132
Asplenium_alatum	-75.4886	-10.4028	2138	75.3161
Asplenium_alatum	-75.5036	5.17808	1928	18.104
Asplenium_alatum	-75.5256	6.26144	2340	32.6314
Asplenium_alatum	-75.57	-10.18	1145	57.0266
Asplenium_alatum	-75.6809	5.55764	2636	10.0302
Asplenium_alatum	-75.6994	6.13969	2121	14.732
Asplenium_alatum	-75.7919	6.77278	2375	6.5196
Asplenium_alatum	-75.9495	7.0205	1850	13.7116
Asplenium_alatum	-76.0052	5.74704	1839	24.9974
Asplenium_alatum	-76.1	1.6	2107	29.8881
Asplenium_alatum	-76.1522	4.78361	1999	15.5011
Asplenium_alatum	-76.2035	6.6256	2535	35.1334
Asplenium_alatum	-76.2934	4.7421	2230	27.1264
Asplenium_alatum	-76.3167	6.53333	1006	47.4171
Asplenium_alatum	-76.5836	20.0496	1618	10.217
Asplenium_alatum	-76.6333	3.41666	2199	16.5363
Asplenium_alatum	-76.65	18.0833	1477	14.375
Asplenium_alatum	-76.7333	18.1333	922	12.8205
Asplenium_alatum	-76.8047	1.95472	2779	29.7629
Asplenium_alatum	-77.2586	1.27056	2714	29.7041
Asplenium_alatum	-77.3897	0.743333	2377	55.1109
Asplenium_alatum	-77.4167	-5.63333	1183	88.9545
Asplenium_alatum	-77.466	-6.866	1908	53.0557
Asplenium_alatum	-77.6764	-5.67416	1396	82.3709
Asplenium_alatum	-77.733	-0.233	1743	58.6852
Asplenium_alatum	-77.75	-0.46666	2425	43.0924
Asplenium_alatum	-77.8	-0.3	1991	53.011
Asplenium_alatum	-77.8333	-0.73333	1467	21.5732
Asplenium_alatum	-77.9	-0.466	1859	33.6472
Asplenium_alatum	-77.9247	-5.73555	1788	62.4397
Asplenium_alatum	-78.05	0.86666	2118	22.0117
[truncated: 42,658 more rows]

## Sheet: S2
Supplementary Data 2. Chromosome numbers and estimated ploidy levels
Taxon	Chromosome number (x)	Ploidy level (2n)	Reference
Asplenium_abscissum	36	2	Walker, T. G. (1966). A cytotaxonomic survey of the pteridophytes of Jamaica. Transactions of the Royal Society of Edinburgh, 66, 169–237.
Asplenium_abscissum	36	2	Morzenti, V. M. (1967). Asplenium plenum: a fern which suggests an unusual method of species formation. American Journal of Botany, 54(9), 1061-1068.
Asplenium_abscissum	36	2	Wagner, W. H. (1963). A biosystematic survey of United States ferns: Preliminary abstract. American Fern Journal, 53(1), 1-16.
Asplenium_abscissum	72	4	Mickel, J. T., Wagner, W. H., & Chen, K. L. (1966). Chromosome observations on the ferns of Mexico. Caryologia, 19(1), 95-102.
Asplenium_abscissum	144	8	Fabbri, F. (1965). Secondo supplemento alle tavole cromosomiche delle Pteridophyta di Alberto Chiarugi. Caryologia, 18(4), 675-731.
Asplenium_acuminatum	144	8	Wagner, W. H. (1963). A biosystematic survey of United States ferns: Preliminary abstract. American Fern Journal, 53(1), 1-16.
Asplenium_adiantum-nigrum	36	2	Meyer, D. E. (1960). Hybrids in the genus Asplenium found in Northwestern and Central Europe. American Fern Journal, 50(1), 138-145.
Asplenium_adiantum-nigrum	72	4	Meyer, D. E. (1960). Hybrids in the genus Asplenium found in Northwestern and Central Europe. American Fern Journal, 50(1), 138-145.
Asplenium_adiantum-nigrum	72	4	Shivas, M. G. (1969). A cytotaxonomic study of the Asplenium adiantum-nigrum complex. British Fern Gazette, 10(2), 68-80.
Asplenium_adiantum-nigrum	72	4	Löve, A., & Kjellqvist, E. (1972). Cytotaxonomy of Spanish plants. I. Introduction. Pteridophyta and Gymnospermae. Lagascalia, 2(1), 23-35.
Asplenium_adiantum-nigrum	72	4	Razdan, B., Kachroo, P., & Bir, S. S. (1986). Cytomorphology of the ferns of Kashmir-I Asplenaciace. Indian Fern Journal, 3, 111–120.
Asplenium_adiantum-nigrum	72	4	Rasbach, H., Rasbach, K., & Bennert, H. W. (1990). New records and new cytological results for the fern flora of Madeira. Fern Gazette, 13(7), 391-395.
Asplenium_adiantum-nigrum	72	4	Reichstein, T., Viane, R. L. L., Rasbach, H., & Schneller, J. (1994). Asplenium adiantum-nigrum L. ssp. yuanum (Ching) Viane, Rasbach, Reichstein & Schneller stat. nov. and the status of A. woronowii Christ (Aspleniaceae, Pteridophyta). Candollea, 49, 281-328.
Asplenium_adiantum-nigrum	108	6	Razdan, B., Kachroo, P., & Bir, S. S. (1986). Cytomorphology of the ferns of Kashmir-I Asplenaciace. Indian Fern Journal, 3, 111–120.
Asplenium_adulterinum	72	4	Wisskirchen, R., & Haeupler, H. (1998) Standardliste der Farn- und Blütenpflanzen Deutschlands. Eugen Ulmer, Stuttgart.
Asplenium_aegaeum	36	2	Reichstein, T., Lovis, J. D., Greuter, W., & Zaffran, J. (1973). Die Asplenien der Insel Kreta. Annales musei goulandris, 1, 133–163.
Asplenium_aegaeum	72	4	Reichstein, T., Lovis, J. D., Greuter, W., & Zaffran, J. (1973). Die Asplenien der Insel Kreta. Annales musei goulandris, 1, 133–163.
Asplenium_aethiopicum	72	4	Tindale, M. D., & Roy, S. K. (2002). A cytotaxonomic survey of the Pteridophyta of Australia. Australian Systematic Botany, 15(6), 839-937.
Asplenium_aethiopicum	72	4	Panigrahi, G. (1963). Cyto-taxonomic studies in Asplenium aethiopicum (Burm.) Bechere complex. Proceedings of Indian National Science Academy, 29(4), 383-395.
Asplenium_aethiopicum	72	4	Fabbri, F. (1965). Secondo supplemento alle tavole cromosomiche delle Pteridophyta di Alberto Chiarugi. Caryologia, 18(4), 675-731.
Asplenium_aethiopicum	144	8	Fabbri, F. (1965). Secondo supplemento alle tavole cromosomiche delle Pteridophyta di Alberto Chiarugi. Caryologia, 18(4), 675-731.
Asplenium_aethiopicum	144	8	Manton, I., & Sledge, W. A. (1954). Observations on the cytology and taxonomy of the pteridophyte flora of Ceylon. Philosophical Transactions of the Royal Society of London. Series B, Biological Sciences, 238, 127-185.
Asplenium_aethiopicum	144	8	Abraham, A., Ninan, C. A., & Mathew, P. M. (1962). Studies on the cytology and phylogeny of the pteridophytes VII. Observations on one hundred species of South Indian ferns. Journal of the Indian Botanical Society, 41, 339–421.
Asplenium_aethiopicum	144	8	Panigrahi, G. (1963). Cyto-taxonomic studies in Asplenium aethiopicum (Burm.) Bechere complex. Proceedings of Indian National Science Academy, 29(4), 383-395.
Asplenium_aethiopicum	144	8	Raj, V. I., & Manickam, V. S. (1987). SOCGI plant chromosome number reports—IV [ie V]. Journal of Cytology and Genetics, 22, 156-161.
Asplenium_aethiopicum	144	8	Irudayaraj, V., & Bir, S. S. (1994). Cytology of some ferns from the Niligris, south India II. Fern Gazette, 14, 301-312.
Asplenium_aethiopicum	144	8	Rajkumar, S. D. (2001). IOPB chromosome data 17. Newslett. Int. Organ. Pl. Biosyst.(Pruhonice), 33, 25-26.
Asplenium_aethiopicum	180	10	Tindale, M. D., & Roy, S. K. (2002). A cytotaxonomic survey of the Pteridophyta of Australia. Australian Systematic Botany, 15(6), 839-937.
Asplenium_aethiopicum	216	12	Panigrahi, G. (1963). Cyto-taxonomic studies in Asplenium aethiopicum (Burm.) Bechere complex. Proceedings of Indian National Science Academy, 29(4), 383-395.
Asplenium_aethiopicum	216	12	Manton, I., Lovis, J. D., Vida, G., & Gibby, M. (1986). Cytology of the fern flora of Madeira. Bulletin of the British Museum. Natural History. Botany, 15(2), 123-161.
Asplenium_affine	144	8	Manton, I., & Sledge, W. A. (1954). Observations on the cytology and taxonomy of the pteridophyte flora of Ceylon. Philosophical Transactions of the Royal Society of London. Series B, Biological Sciences, 238, 127-185.
Asplenium_affine	216	12	Manton, I., & Sledge, W. A. (1954). Observations on the cytology and taxonomy of the pteridophyte flora of Ceylon. Philosophical Transactions of the Royal Society of London. Series B, Biological Sciences, 238, 127-185.
Asplenium_alatum	36	2	Walker, T. G. (1966). A cytotaxonomic survey of the pteridophytes of Jamaica. Transactions of the Royal Society of Edinburgh, 66, 169–237.
Asplenium_altajense	72	4	Lin, Y. X., & Viane, R. (2013). Aspleniaceae. In Z. Y. Wu, P. H. Raven & D. Y. Hong [eds.], Flora of China, Vol. 2–3 (Pteridophytes), 267–316, Science Press (Beijing) & Missouri Botanical Garden (St. Louis).
Asplenium_anceps	36	2	Rasbach, H., Rasbach, K., & Schneller, J. J. (1981). A chromosome count for Asplenium anceps from the Canary Islands. Fern Gazette, 12(3), 157-159.
Asplenium_anceps	36	2	Manton, I., Lovis, J. D., Vida, G., & Gibby, M. (1986). Cytology of the fern flora of Madeira. Bulletin of the British Museum. Natural History. Botany, 15(2), 123-161.
Asplenium_anceps	36	2	Rumsey, F., Russell, S., Schäfer, H., & Rasbach, H. (2004). Distribution, ecology and cytology of Asplenium azoricum Lovis, Rasbach & Reichstein (Aspleniaceae, Pteridophyta) and its hybrids. American Fern Journal, 94(3), 113-125.
Asplenium_anogrammoides	72	4	Schneider, H., et al. (2017). Neo-and Paleopolyploidy contribute to the species diversity of Asplenium-the most species-rich genus of ferns. Journal of Systematics and Evolution, 55(4), 353-364.
Asplenium_anogrammoides	72	4	Lin, Y. X., & Viane, R. (2013). Aspleniaceae. In Z. Y. Wu, P. H. Raven & D. Y. Hong [eds.], Flora of China, Vol. 2–3 (Pteridophytes), 267–316, Science Press (Beijing) & Missouri Botanical Garden (St. Louis).
Asplenium_antiquum	72	4	Kawakami, S. (1970). Karyological studies on Aspleniaceae. II. Chromosomes of seven species in Aspleniaceae. Botanical Magazine, Tokyo 83, 74–81.
Asplenium_antiquum	72	4	Lin, Y. X., & Viane, R. (2013). Aspleniaceae. In Z. Y. Wu, P. H. Raven & D. Y. Hong [eds.], Flora of China, Vol. 2–3 (Pteridophytes), 267–316, Science Press (Beijing) & Missouri Botanical Garden (St. Louis).
Asplenium_antrophyoides	72	4	Schneider, H., et al. (2017). Neo-and Paleopolyploidy contribute to the species diversity of Asplenium-the most species-rich genus of ferns. Journal of Systematics and Evolution, 55(4), 353-364.
Asplenium_antrophyoides	72	4	Lin, Y. X., & Viane, R. (2013). Aspleniaceae. In Z. Y. Wu, P. H. Raven & D. Y. Hong [eds.], Flora of China, Vol. 2–3 (Pteridophytes), 267–316, Science Press (Beijing) & Missouri Botanical Garden (St. Louis).
Asplenium_appendiculatum	144	8	Schneider, H., et al. (2017). Neo-and Paleopolyploidy contribute to the species diversity of Asplenium-the most species-rich genus of ferns. Journal of Systematics and Evolution, 55(4), 353-364.
Asplenium_attenuatum	144	8	Schneider, H., et al. (2017). Neo-and Paleopolyploidy contribute to the species diversity of Asplenium-the most species-rich genus of ferns. Journal of Systematics and Evolution, 55(4), 353-364.
Asplenium_aureum	72	4	Schneider, H., et al. (2017). Neo-and Paleopolyploidy contribute to the species diversity of Asplenium-the most species-rich genus of ferns. Journal of Systematics and Evolution, 55(4), 353-364.
Asplenium_auriculatum	72	4	Mickel, J. T., Wagner, W. H., & Chen, K. L. (1966). Chromosome observations on the ferns of Mexico. Caryologia, 19(1), 95-102.
Asplenium_auritum	36	2	Guillén, R. H., & Daviña, J. R. (2005). Estudios cromosómicos en especies de Asplenium (Aspleniaceae) de la Argentina. Darwiniana, 43, 44-51.
Asplenium_auritum	72	4	Walker, T. G. (1966). A cytotaxonomic survey of the pteridophytes of Jamaica. Transactions of the Royal Society of Edinburgh, 66, 169–237.
Asplenium_australasicum	72	4	Nakato, N. (1987). Notes on chromosomes of Japanese pteridophytes (1). Journal of Japanese Botany, 62, 261-267.
Asplenium_australasicum	72	4	Tindale, M. D., & Roy, S. K. (2002). A cytotaxonomic survey of the Pteridophyta of Australia. Australian Systematic Botany, 15(6), 839-937.
Asplenium_austrochinense	72	4	Wang, Z. R. (1989). A preliminary report on the cytology of some species of Asplenium from China. In Proceedings of International Symposium on Systematic Pteridology (1988) (pp. 133-134). China Science and Technology Press.
Asplenium_austrochinense	144	8	Lin, Y. X., & Viane, R. (2013). Aspleniaceae. In Z. Y. Wu, P. H. Raven & D. Y. Hong [eds.], Flora of China, Vol. 2–3 (Pteridophytes), 267–316, Science Press (Beijing) & Missouri Botanical Garden (St. Louis).
Asplenium_azoricum	72	4	Lovis, J. D., Rasbach, H., Rasbach, K., & Reichstein, T. (1977). Asplenium azoricum and other ferns of the A. trichomanes group from the Azores. American Fern Journal, 67(3), 81-93.
Asplenium_balearicum	72	4	Shivas, M. G. (1969). A cytotaxonomic study of the Asplenium adiantum-nigrum complex. British Fern Gazette, 10(2), 68-80.
Asplenium_balearicum	72	4	Lovis, J. D., Brownsey, P. J., Sleep, A., & Shivas, M. G. (1972). The origin of Asplenium balearicum. British Fern Gazette, 10(5), 263-269.
Asplenium_balearicum	72	4	Cubas, P., Rosselló, J. A., & Pangua, E. (1988). Comparative study of Asplenium balearicum, A. onopteris and their spontaneous hybrid A. x tyrrhenicum. Anales del Jardín Botánico de Madrid, 45, 75-92.
Asplenium_boreale	72	4	Schneider, H., et al. (2017). Neo-and Paleopolyploidy contribute to the species diversity of Asplenium-the most species-rich genus of ferns. Journal of Systematics and Evolution, 55(4), 353-364.
Asplenium_bourgaei	36	2	Schneider, H., et al. (2017). Neo-and Paleopolyploidy contribute to the species diversity of Asplenium-the most species-rich genus of ferns. Journal of Systematics and Evolution, 55(4), 353-364.
Asplenium_bulbiferum	72	4	Brownsey, P. J., & Lange, P. D. (1997). Asplenium cimmeriorum, a new fern species from New Zealand. New Zealand Journal of Botany, 35(3), 283-292.
Asplenium_bulbiferum	72	4	Brownsey, P. J. (1977). A taxonomic revision of the New Zealand species of Asplenium. New Zealand Journal of Botany, 15(1), 39-86.
Asplenium_bulbiferum	72	4	Schneider, H., et al. (2017). Neo-and Paleopolyploidy contribute to the species diversity of Asplenium-the most species-rich genus of ferns. Journal of Systematics and Evolution, 55(4), 353-364.
Asplenium_bulbiferum	144	8	Matsumoto, S., & Nakaike, T. (1988) Chromosome numbers of some ferns in Kathmandu Nepal. In M. Watanabe & S. B. Malla [eds], Cryptogams of the Himalayas, Vol 1, 177–185, Department of Botany, National Science Museum, Tsukuba.
Asplenium_bullatum	72	4	Bir, S. S. (1960). Cytological observations on the East Himalayan members of AspleniumLinn. Current Science, 29(11), 445-447.
Asplenium_bullatum	144	8	Matsumoto, S., & Nakaike, T. (1988) Chromosome numbers of some ferns in Kathmandu Nepal. In M. Watanabe & S. B. Malla [eds], Cryptogams of the Himalayas, Vol 1, 177–185, Department of Botany, National Science Museum, Tsukuba.
Asplenium_capillipes	36	2	Mitui, K. (1970). Chromosome studies on Japanese ferns (4). Journal of Japanese Botany, 45, 84-90.
Asplenium_capillipes	36	2	Lin, Y. X., & Viane, R. (2013). Aspleniaceae. In Z. Y. Wu, P. H. Raven & D. Y. Hong [eds.], Flora of China, Vol. 2–3 (Pteridophytes), 267–316, Science Press (Beijing) & Missouri Botanical Garden (St. Louis).
Asplenium_capillipes	36	2	Schneider, H., et al. (2017). Neo-and Paleopolyploidy contribute to the species diversity of Asplenium-the most species-rich genus of ferns. Journal of Systematics and Evolution, 55(4), 353-364.
Asplenium_capillipes	72	4	Bir, S. S., Irudayaraj, V., & Singh, S. (1994). Biosystematic studies on the asplenioid and athyrioid genera from the Himalayas: results of chromosomal analysis on population basis. Indian Fern Journal, 11, 82–88.
Asplenium_castaneoviride	72	4	Schneider, H., et al. (2017). Neo-and Paleopolyploidy contribute to the species diversity of Asplenium-the most species-rich genus of ferns. Journal of Systematics and Evolution, 55(4), 353-364.
Asplenium_caudatum	72	4	Manton, I., & Sledge, W. A. (1954). Observations on the cytology and taxonomy of the pteridophyte flora of Ceylon. Philosophical Transactions of the Royal Society of London. Series B, Biological Sciences, 238, 127-185.
Asplenium_ceterach	72	4	Razdan, B., Kachroo, P., & Bir, S. S. (1986). Cytomorphology of the ferns of Kashmir-I Aspleniaceae. Indian Fern Journal, 3, 111-120.
Asplenium_ceterach	72	4	Van Den Heede, C. J., Pajaron, S., Pangua, E., & Viane, R. L. (2002). A new species and a new hybrid of Asplenium (Aspleniaceae) from Cyprus and evidence of their origin. Belgian Journal of Botany, 92-116.
Asplenium_ceterach	72	4	Lin, Y. X., & Viane, R. (2013). Aspleniaceae. In Z. Y. Wu, P. H. Raven & D. Y. Hong [eds.], Flora of China, Vol. 2–3 (Pteridophytes), 267–316, Science Press (Beijing) & Missouri Botanical Garden (St. Louis).
Asplenium_chathamense	72	4	Brownsey, P. J. (1985). Asplenium chathamense—a new fern species from the Chatham Islands, New Zealand. New Zealand Journal of Botany, 23(1), 135-140.
Asplenium_cimmeriorum	144	8	Brownsey, P. J., & Lange, P. D. (1997). Asplenium cimmeriorum, a new fern species from New Zealand. New Zealand Journal of Botany, 35(3), 283-292.
Asplenium_claussenii	36	2	Smith, A. R., & Foster, M. S. (1984). Chromosome numbers and ecological observations of ferns from El Tirol, Paraguay. British Fern Gazette, 12, 321–329.
Asplenium_coenobiale	72	4	Lin, Y. X., & Viane, R. (2013). Aspleniaceae. In Z. Y. Wu, P. H. Raven & D. Y. Hong [eds.], Flora of China, Vol. 2–3 (Pteridophytes), 267–316, Science Press (Beijing) & Missouri Botanical Garden (St. Louis).
Asplenium_cordatum	72	4	Schneider, H., et al. (2017). Neo-and Paleopolyploidy contribute to the species diversity of Asplenium-the most species-rich genus of ferns. Journal of Systematics and Evolution, 55(4), 353-364.
Asplenium_crinicaule	72	4	Bir, S. S. (1960). Cytological observations on the East Himalayan members of AspleniumLinn. Current Science, 29(11), 445-447.
Asplenium_crinicaule	72	4	Lin, Y. X., & Viane, R. (2013). Aspleniaceae. In Z. Y. Wu, P. H. Raven & D. Y. Hong [eds.], Flora of China, Vol. 2–3 (Pteridophytes), 267–316, Science Press (Beijing) & Missouri Botanical Garden (St. Louis).
Asplenium_crinicaule	144	8	Wang, Z. R. (1989). A preliminary report on the cytology of some species of Asplenium from China. In K. H. Shing, and K. U. Kramer [eds.], Proceedings of the international symposium on systematic pteridology, Beijing, China, 133- 134. Science and Technology Press, Beijing, China.
Asplenium_crinicaule	144	8	Lin, Y. X., & Viane, R. (2013). Aspleniaceae. In Z. Y. Wu, P. H. Raven & D. Y. Hong [eds.], Flora of China, Vol. 2–3 (Pteridophytes), 267–316, Science Press (Beijing) & Missouri Botanical Garden (St. Louis).
Asplenium_crinicaule	216	12	Lin, Y. X., & Viane, R. (2013). Aspleniaceae. In Z. Y. Wu, P. H. Raven & D. Y. Hong [eds.], Flora of China, Vol. 2–3 (Pteridophytes), 267–316, Science Press (Beijing) & Missouri Botanical Garden (St. Louis).
Asplenium_cristatum	36	2	Wagner, W. H. (1963). A biosystematic survey of United States ferns: Preliminary abstract. American Fern Journal, 53(1), 1-16.
Asplenium_cristatum	36	2	Morzenti, V. M. (1967). Asplenium plenum: a fern which suggests an unusual method of species formation. American Journal of Botany, 54(9), 1061-1068.
Asplenium_cristatum	36	2	Haufler, C. H., & Soltis, D. E. (1986). Genetic evidence suggests that homosporous ferns with high chromosome numbers are diploid. Proceedings of the National Academy of Sciences, 83(12), 4389-4393.
Asplenium_cristatum	72	4	Jarrett, F. M., Manton, I., & Roy, S. K. (1968). Cytological and taxonomic notes on a small collection of living ferns from Galapagos. Kew Bulletin, 22, 475-480.
Asplenium_cristatum	72	4	Walker, T. G. (1985). Cytotaxonomic studies of the ferns of Trinidad. 2. The cytological and taxonomical implications. Bulletin of the British Museum (Natural History) Botany, 13, 149-249.
Asplenium_cuneatiforme	72	4	Chang, Y. (2017). Polyploidy and the formation of species diversity in Aspleniaceae, Biodiversity Science, 25(6), 621-626.
Asplenium_cuneatum	72	4	Walker, T. G. (1966). A cytotaxonomic survey of the pteridophytes of Jamaica. Transactions of the Royal Society of Edinburgh, 66, 169–237.
Asplenium_cuneifolium	36	2	Sleep, A., Roberts, R. H., Souter, J. I., & Stirling, A. (1978). Further investigations on Asplenium cuneifolium in the British Isles. Fern Gazette, 11, 345-348.
Asplenium_cuneifolium	36	2	Meyer, D. E. (1968). Über neue und seltene Asplenien Europas: 5. Mitteilung. Berichte der Deutschen Botanischen Gesellschaft, 81, 92-106.
Asplenium_cuneifolium	36	2	Rasbach, H., Schneller, J., Gibby, M., & Reichstein, T. (1986). Asplenium cuneifolium Viv. (diploid) from the type locality (Aspleniaceae, Pteridophyta) with an appendix on related plants from other places in south-western and central Europe. Candollea, 41, 219–244.
Asplenium_cuneifolium	36	2	Rasbach, H., Reichstein, T., & Viane, R. L. (1994). Asplenium chihuahuense (Aspleniaceae, Pteridophyta), an allohexaploid species and the description of a simplified hybridization technique. American Fern Journal, 11-40.
Asplenium_cuneifolium	36	2	Shivas, M. G. (1969). A cytotaxonomic study of the Asplenium adiantum-nigrum complex. British Fern Gazette, 10(2), 68-80.
Asplenium_cuneifolium	72	4	Sleep, A., Roberts, R. H., Souter, J. I., & Stirling, A. (1978). Further investigations on Asplenium cuneifolium in the British Isles. Fern Gazette, 11, 345-348.
Asplenium_currorii	72	4	Schneider, H., et al. (2017). Neo-and Paleopolyploidy contribute to the species diversity of Asplenium-the most species-rich genus of ferns. Journal of Systematics and Evolution, 55(4), 353-364.
Asplenium_cuspidatum	72	4	Walker, T. G. (1966). A cytotaxonomic survey of the pteridophytes of Jamaica. Transactions of the Royal Society of Edinburgh, 66, 169–237.
Asplenium_cuspidatum	72	4	Mickel, J. T., Wagner Jr, W. H., & Chen, K. L. (1966). Chromosome observations on the ferns of Mexico. Caryologia, 19(1), 95-102.
Asplenium_dalhousiae	36	2	Bir, S. S., Irudayaraj, V., & Singh, S. (1994). Biosystematic studies on the Asplenoid & Athyrioid genera from the Himayalas. Results of chromosomal analysis on population basis. Indian Fern Journal, 11, 82–88.
Asplenium_dalhousiae	36	2	Razdan, B., Kachroo, P., & Bir, S. S. (1986). Cytomorphology of the ferns of Kashmir-I Asplenaciace. Indian Fern Journal, 3, 111–120.
Asplenium_dalhousiae	36	2	Bir, S. S., & Shukla, P. (1967). Cytology of some north Indian ferns. Cytologia, 32(1), 24-30.
Asplenium_dareoides	72	4	Jara-Seguel, P., Romero-Mieres, M., & Palma-Rojas, C. (2006). Chromosome numbers of Chilean pteridophytes: first contribution. Gayana Botánica, 63(1), 115-118.
Asplenium_delavayi	72	4	Chang, Y. (2017). Polyploidy and the formation of species diversity in Aspleniaceae, Biodiversity Science, 25(6), 621-626.
Asplenium_dielerectum	36	2	Schneider, H., et al. (2017). Neo-and Paleopolyploidy contribute to the species diversity of Asplenium-the most species-rich genus of ferns. Journal of Systematics and Evolution, 55(4), 353-364.
Asplenium_dregeanum	72	4	Schneider, H., et al. (2017). Neo-and Paleopolyploidy contribute to the species diversity of Asplenium-the most species-rich genus of ferns. Journal of Systematics and Evolution, 55(4), 353-364.
Asplenium_emarginatum	72	4	Schneider, H., et al. (2017). Neo-and Paleopolyploidy contribute to the species diversity of Asplenium-the most species-rich genus of ferns. Journal of Systematics and Evolution, 55(4), 353-364.
Asplenium_ensiforme	36	2	Punetha, N. (1989). Cytological observations on ferns of Kumaon (NW Himalaya). Plant science research in India, 11, 459-465.
Asplenium_ensiforme	72	4	Bir, S. S., Irudayaraj, V., & Singh, S. (1994). Biosystematic studies on the asplenioid and athyrioid genera from the Himalayas: results of chromosomal analysis on population basis. Indian Fern Journal, 11, 82–88.
Asplenium_ensiforme	72	4	Bir, S. S. (1965). Chromosome numbers in some ferns from Kodaikanal, South India. Caryologia, 18(1), 107-115.
Asplenium_ensiforme	72	4	Lin, Y. X., & Viane, R. (2013). Aspleniaceae. In Z. Y. Wu, P. H. Raven & D. Y. Hong [eds.], Flora of China, Vol. 2–3 (Pteridophytes), 267–316, Science Press (Beijing) & Missouri Botanical Garden (St. Louis).
Asplenium_erectum	36	2	Irudayaraj, V., Bir, S. S., & Manickam, V. S. (1993). Cytology of ferns from the Nilgiris, south India. Fern Gazette, 14, 161-170.
Asplenium_erectum	36	2	Raj, V. I. & Manickam, V. S. (1987). SOCGI plant chromosome number reports -- IV [i.e., V]. Journal of Cytology and Genetics, 22, 156-161.
Asplenium_erectum	36	2	Irudayaraj, V. & Manickam, V. S. (1986). Chromosome number reports 91 -- on 14 spp. of ferns. Taxon, 35, 410.
Asplenium_erectum	36	2	Irudayaraj, V., Bir, S. S., & Manickam, V. S. (1993). Cytology of ferns from the Nilgiris, south India. Fern Gazette, 14, 161-170.
Asplenium_erosum	288	16	Walker, T. G. (1966). A cytotaxonomic survey of the pteridophytes of Jamaica. Transactions of the Royal Society of Edinburgh, 66, 169–237.
Asplenium_exiguum	72	4	Bir, S.S. (1959) Cytotaxonomic observations on some Aspleniaceae from Kullu Valley. Journal of Indian Botanical Society, 38, 528-539.
Asplenium_exiguum	72	4	Lin, Y. X., & Viane, R. (2013). Aspleniaceae. In Z. Y. Wu, P. H. Raven & D. Y. Hong [eds.], Flora of China, Vol. 2–3 (Pteridophytes), 267–316, Science Press (Beijing) & Missouri Botanical Garden (St. Louis).
Asplenium_falcatum	72	4	Manton, I., & Sledge, W. A. (1954). Observations on the cytology and taxonomy of the pteridophyte flora of Ceylon. Philosophical Transactions of the Royal Society of London. Series B, Biological Sciences, 238, 127-185.
Asplenium_falcatum	72	4	Bir, S. S. (1960). Cytological observations on the East Himalayan members of AspleniumLinn. Current Science, 29(11), 445-447.
Asplenium_falcatum	180	10	Ammal, L. S., & Bhavanandan, K. V. (1991). Cytological studies on the genus Asplenium Linn. Indian Fern Journal, 8, 69–73.
Asplenium_finlaysonianum	72	4	Bir, S. S. (1960). Cytological observations on the East Himalayan members of AspleniumLinn. Current Science, 29(11), 445-447.
Asplenium_finlaysonianum	144	8	Lin, Y. X., & Viane, R. (2013). Aspleniaceae. In Z. Y. Wu, P. H. Raven & D. Y. Hong [eds.], Flora of China, Vol. 2–3 (Pteridophytes), 267–316, Science Press (Beijing) & Missouri Botanical Garden (St. Louis).
Asplenium_fissum	36	2	Meyer, D. E. (1960). Hybrids in the genus Asplenium found in Northwestern and Central Europe. American Fern Journal, 50(1), 138-145.
Asplenium_fissum	36	2	Nardi, E. (1979). Commentarla pteridologica. III. Notulae chorologicae atque cytologicae Italicae. Webbia, 33(2), 435-447.
Asplenium_flabellifolium	72	4	Tindale, M. D., & Roy, S. K. (2002). A cytotaxonomic survey of the Pteridophyta of Australia. Australian Systematic Botany, 15(6), 839-937.
Asplenium_flabellifolium	180	5	Tindale, M. D., & Roy, S. K. (2002). A cytotaxonomic survey of the Pteridophyta of Australia. Australian Systematic Botany, 15(6), 839-937.
Asplenium_flabellifolium	216	6	Tindale, M. D., & Roy, S. K. (2002). A cytotaxonomic survey of the Pteridophyta of Australia. Australian Systematic Botany, 15(6), 839-937.
Asplenium_flabellifolium	216	12	Tindale, M. D., & Roy, S. K. (2002). A cytotaxonomic survey of the Pteridophyta of Australia. Australian Systematic Botany, 15(6), 839-937.
Asplenium_flaccidum	72	4	Tindale, M. D., & Roy, S. K. (2002). A cytotaxonomic survey of the Pteridophyta of Australia. Australian Systematic Botany, 15(6), 839-937.
Asplenium_flaccidum	72	4	Brownsey, P. J. (1977). A taxonomic revision of the New Zealand species of Asplenium. New Zealand Journal of Botany, 15(1), 39-86.
Asplenium_fontanum	36	2	Herrero, A., et al. (1997). Números cromosomáticos de plantas occidentales, 723-726. In Anales del Jardín Botánico de Madrid, 55, 135.
Asplenium_fontanum	36	2	Meyer, D. E. (1960). Hybrids in the genus Asplenium found in Northwestern and Central Europe. American Fern Journal, 50(1), 138-145.
Asplenium_formosae	72	4	Chang, Y. (2017). Polyploidy and the formation of species diversity in Aspleniaceae, Biodiversity Science, 25(6), 621-626.
Asplenium_formosum	36	2	Walker, T. G. (1966). A cytotaxonomic survey of the pteridophytes of Jamaica. Transactions of the Royal Society of Edinburgh, 66, 169–237.
Asplenium_formosum	36	2	Ghatak, J. (1977). Biosystematic survey of pteridophytes from Shevaroy Hills, south India. Nucleus, 20, 105-108.
Asplenium_formosum	36	2	Guillén, R. H., & Daviña, J. R. (2005). Estudios cromosómicos en especies de Asplenium (Aspleniaceae) de la Argentina. Darwiniana, 43, 44-51.
Asplenium_formosum	72	4	Sankari, L. A. (1991). Cytological studies on the genus Asplenium Linn. Indian Fern Journal, 8, 69-73.
Asplenium_fragrans	72	4	Walker, T. G. (1966). A cytotaxonomic survey of the pteridophytes of Jamaica. Transactions of the Royal Society of Edinburgh, 66, 169–237.
Asplenium_fragrans	72	4	Mickel, J. T., Wagner, W. H., & Chen, K. L. (1966). Chromosome observations on the ferns of Mexico. Caryologia, 19(1), 95-102.
Asplenium_goudeyi	72	4	Tindale, M. D., & Roy, S. K. (2002). A cytotaxonomic survey of the Pteridophyta of Australia. Australian Systematic Botany, 15(6), 839-937.
Asplenium_griffithianum	36	2	Bir, S. S. (1960). Cytological observations on the East Himalayan members of AspleniumLinn. Current Science, 29(11), 445-447.
Asplenium_gueinzianum	72	4	Lin, Y. X., & Viane, R. (2013). Aspleniaceae. In Z. Y. Wu, P. H. Raven & D. Y. Hong [eds.], Flora of China, Vol. 2–3 (Pteridophytes), 267–316, Science Press (Beijing) & Missouri Botanical Garden (St. Louis).
Asplenium_hemionitis	36	2	Manton, I., Lovis, J. D., Vida, G., & Gibby, M. (1986). Cytology of the fern flora of Madeira. Bulletin of the British Museum. Natural History. Botany, 15(2), 123-161.
Asplenium_hemionitis	36	2	Queirós, M. & J. Ormonde. 1987. Contribuiçao para o conhecimento citotaxonómico da flora dos Açores III. Revista de Biología da Universidade de Aveiro, 1, 31–46.
Asplenium_hemionitis	36	2	Schneider, H., et al. (2017). Neo-and Paleopolyploidy contribute to the species diversity of Asplenium-the most species-rich genus of ferns. Journal of Systematics and Evolution, 55(4), 353-364.
Asplenium_hemitomum	144	8	Schneider, H., et al. (2017). Neo-and Paleopolyploidy contribute to the species diversity of Asplenium-the most species-rich genus of ferns. Journal of Systematics and Evolution, 55(4), 353-364.
Asplenium_heterochroum	72	4	Lovis, J. D., Rasbach, H., Rasbach, K., & Reichstein, T. (1977). Asplenium azoricum and other ferns of A. trichomanes group from the Azores. American Fern Journal, 67, 81–93.
Asplenium_heterochroum	72	4	Morzenti, V. M. (1966). Morphological and cytological data on southeastern United States species of the Asplenium heterochroum-resiliens complex. American Fern Journal, 56(4), 167-177.
Asplenium_heterochroum	72	4	Wagner, W. H. (1966). Two new species of ferns from the United States. American Fern Journal, 56(1), 3-17.
Asplenium_heterochroum	108	6	Lovis, J. D., Rasbach, H., Rasbach, K., & Reichstein, T. (1977). Asplenium azoricum and other ferns of A. trichomanes group from the Azores. American Fern Journal, 67, 81–93.
Asplenium_hispanicum	36	2	Schneider, H., et al. (2017). Neo-and Paleopolyploidy contribute to the species diversity of Asplenium-the most species-rich genus of ferns. Journal of Systematics and Evolution, 55(4), 353-364.
Asplenium_hobdyi	72	4	Wagner, W. H. J. (1993). New species of Hawaiian pteridophytes. Contributions from the University of Michigan Herbarium, 19, 63–82.
Asplenium_hostmannii	72	4	Walker, T. G. (1985). Cytotaxonomic studies of the ferns of Trinidad. 2. The cytological and taxonomical implications. Bulletin of the British Museum (Natural History) Botany, 13, 149-249.
Asplenium_humbertii	108	6	Lin, Y. X., & Viane, R. (2013). Aspleniaceae. In Z. Y. Wu, P. H. Raven & D. Y. Hong [eds.], Flora of China, Vol. 2–3 (Pteridophytes), 267–316, Science Press (Beijing) & Missouri Botanical Garden (St. Louis).
Asplenium_hybridum	36	2	Lovric, A. Z. (1985). Biology and distribution of Asplenium s.l. in the West Balkans. Proceedings of the Royal Society of Edinburgh, Section B: Biological Sciences, 86, 472–473.
Asplenium_incisum	36	2	Lin, Y. X., & Viane, R. (2013). Aspleniaceae. In Z. Y. Wu, P. H. Raven & D. Y. Hong [eds.], Flora of China, Vol. 2–3 (Pteridophytes), 267–316, Science Press (Beijing) & Missouri Botanical Garden (St. Louis).
Asplenium_incisum	36	2	Kawakami, S., Ito, M., & Kawakami, S. (1997). Induction of apogamy in twelve fern species and the study of their somatic chromosomes. Chromosome science, 1, 89-95.
Asplenium_jahandiezii	36	2	Schneider, H., et al. (2017). Neo-and Paleopolyploidy contribute to the species diversity of Asplenium-the most species-rich genus of ferns. Journal of Systematics and Evolution, 55(4), 353-364.
Asplenium_juglandifolium	144	8	Walker, T. G. (1985). Cytotaxonomic studies of the ferns of Trinidad. 2. The cytological and taxonomical implications. Bulletin of the British Museum (Natural History) Botany, 13, 149-249.
Asplenium_kiangsuense	72	4	Schneider, H., et al. (2017). Neo-and Paleopolyploidy contribute to the species diversity of Asplenium-the most species-rich genus of ferns. Journal of Systematics and Evolution, 55(4), 353-364.
Asplenium_komarovii	72	4	Lin, Y. X., & Viane, R. (2013). Aspleniaceae. In Z. Y. Wu, P. H. Raven & D. Y. Hong [eds.], Flora of China, Vol. 2–3 (Pteridophytes), 267–316, Science Press (Beijing) & Missouri Botanical Garden (St. Louis).
Asplenium_laciniatum	36	2	Bir, S. S., & Irudayaraj, V. (2001). Cytology of some ferns from the Nilgiris, South India-IV. Fern Gazette, 16(4), 177-190.
Asplenium_laciniatum	72	4	Bir, S. S. (1960). Cytological observations on the East Himalayan members of AspleniumLinn. Current Science, 29(11), 445-447.
Asplenium_laciniatum	72	4	Schneider, H., et al. (2017). Neo-and Paleopolyploidy contribute to the species diversity of Asplenium-the most species-rich genus of ferns. Journal of Systematics and Evolution, 55(4), 353-364.
Asplenium_lamprophyllum	72	4	Brownsey, P. J. (1977). A taxonomic revision of the New Zealand species of Asplenium. New Zealand Journal of Botany, 15(1), 39-86.
Asplenium_lobulatum	144	8	Wagner, W. H. (1963). A biosystematic survey of United States ferns: Preliminary abstract. American Fern Journal, 53(1), 1-16.
Asplenium_lolegnamense	108	6	Schneider, H., et al. (2017). Neo-and Paleopolyploidy contribute to the species diversity of Asplenium-the most species-rich genus of ferns. Journal of Systematics and Evolution, 55(4), 353-364.
Asplenium_loxoscaphoides	70	4	Schneider, H., et al. (2017). Neo-and Paleopolyploidy contribute to the species diversity of Asplenium-the most species-rich genus of ferns. Journal of Systematics and Evolution, 55(4), 353-364.
Asplenium_lunulatum	36	2	Manton, I., & Sledge, W. A. (1954). Observations on the cytology and taxonomy of the pteridophyte flora of Ceylon. Philosophical Transactions of the Royal Society of London. Series B, Biological Sciences, 238, 127-185.
Asplenium_macraei	36	2	Schneider, H., et al. (2017). Neo-and Paleopolyploidy contribute to the species diversity of Asplenium-the most species-rich genus of ferns. Journal of Systematics and Evolution, 55(4), 353-364.
Asplenium_marinum	36	2	Emmott, J. I. (1964). A cytogenetic investigation in a Phyllitis‐Asplenium complex. New Phytologist, 63(3), 306-318.
Asplenium_milnei	72	4	Tindale, M. D., & Roy, S. K. (2002). A cytotaxonomic survey of the Pteridophyta of Australia. Australian Systematic Botany, 15(6), 839-937.
Asplenium_monanthes	108	3	Lovis, J. D., Rasbach, H., Rasbach, K., & Reichstein, T. (1977). Asplenium azoricum and other ferns of the A. trichomanes group from the Azores. American Fern Journal, 67(3), 81-93.
Asplenium_monanthes	108	3	Wagner, W. H., Farrar, D. R., & McAlpin, B. W. (1970). Pteridology of the highlands biological station area, southern Appalachians. Journal of the Elisha Mitchell Scientific Society, 1-27.
Asplenium_montanum	36	2	Wagner, W. H., & Wagner, F. S. (1966). Pteridophytes of the Mountain Lake Area, Giles Co., Virginia: biosystematic studies, 1964-65. Castanea, 31(2), 121-140.
Asplenium_montanum	36	2	Wagner, W. H., Farrar, D. R., & McAlpin, B. W. (1970). Pteridology of the highlands biological station area, southern Appalachians. Journal of the Elisha Mitchell Scientific Society, 1-27.
Asplenium_myriophyllum	72	4	Morzenti, V. M. (1967). Asplenium plenum: a fern which suggests an unusual method of species formation. American Journal of Botany, 54(9), 1061-1068.
Asplenium_nidus	72	4	Bir, S. S. (1960). Cytological observations on the East Himalayan members of AspleniumLinn. Current Science, 29(11), 445-447.
Asplenium_nidus	72	4	Kawakami, S., Ito, M., & Kawakami, S. (1997). Induction of apogamy in twelve fern species and the study of their somatic chromosomes. Chromosome Science, 1, 89-95.
Asplenium_nitidum	144	8	Abraham, A., Ninan, C. A., & Mathew, P. M. (1962). Studies on the cytology and phylogeny of the pteridophytes VII. Observations on one hundred species of South Indian ferns. Journal of the Indian Botanical Society, 41, 339–421.
Asplenium_normale	36	2	Vasudeva, S. M., & Bir. S. S. (1983). Chromosome numbers and evolutionary status of ferns and fern allies of Pachmarhi Hills (Central India).Aspects of Plant Science, 6, 119–181.
Asplenium_normale	72	4	Manton, I., & Sledge, W. A. (1954). Observations on the cytology and taxonomy of the pteridophyte flora of Ceylon. Philosophical Transactions of the Royal Society of London. Series B, Biological Sciences, 238, 127-185.
Asplenium_normale	72	4	Lin, Y. X., & Viane, R. (2013). Aspleniaceae. In Z. Y. Wu, P. H. Raven & D. Y. Hong [eds.], Flora of China, Vol. 2–3 (Pteridophytes), 267–316, Science Press (Beijing) & Missouri Botanical Garden (St. Louis)
Asplenium_normale	72	4	Bir, S. S. (1965). Chromosome numbers in some ferns from Kodaikanal, South India. Caryologia, 18(1), 107-115.
Asplenium_oblongifolium	72	4	Dawson, M. I. (2008). Index of chromosome numbers of indigenous New Zealand vascular plants. Land Care Research, New Zealand. https://www.landcareresearch.co.nz/uploads/public/researchpubs/chromosome2008.pdf
Asplenium_obovatum	36	2	Brullo, S., De Leonardis, W., & Pavone, P. (1982). Chromosome numbers of some Sicilian ferns. 1. Webbia, 35(2), 275-281.
Asplenium_obovatum	72	4	Cubas, P., & Sleep, A. (1994). Asplenium× sarniense (Aspleniaceae: Pteridophyta) from Guernsey (Channel Islands, UK): a cytological enigma. Fern Gazette, 14, 269-288.
Asplenium_obtusatum	72	4	Manton, I., & Vida, G. (1968). Cytology of the fern flora of Tristan da Cunha. Proceedings of the Royal Society of London. Series B. Biological Sciences, 170(1021), 361-379.
Asplenium_obtusatum	72	4	Brownsey, P. J. (1977). A taxonomic revision of the New Zealand species of Asplenium. New Zealand Journal of Botany, 15(1), 39-86.
Asplenium_oligophlebium	36	2	Tatuno, S. (1969). Karyological studies on Aspleniaceae I. Karyotypes of three species in Asplenium. Botanical Magazine (Tokyo), 82, 436-444.
Asplenium_oligophlebium	36	2	Schneider, H., et al. (2017). Neo-and Paleopolyploidy contribute to the species diversity of Asplenium-the most species-rich genus of ferns. Journal of Systematics and Evolution, 55(4), 353-364.
Asplenium_onopteris	36	2	Nardi, E. (1977). Commentaria pteridologica. I. De nonnullis filicibus palaeomediterraneae regionis. Webbia, 32(1), 95-100.
Asplenium_onopteris	36	2	Rasbach, H., Reichstein, T., & Viane, R. L. (1994). Asplenium chihuahuense (Aspleniaceae, Pteridophyta), an allohexaploid species and the description of a simplified hybridization technique. American Fern Journal, 11-40.
Asplenium_paleaceum	72	4	Tindale, M. D., & Roy, S. K. (2002). A cytotaxonomic survey of the Pteridophyta of Australia. Australian Systematic Botany, 15(6), 839-937.
Asplenium_paucivenosum	72	4	Bir, S. S. (1960). Cytological observations on the East Himalayan members of AspleniumLinn. Current Science, 29(11), 445-447.
Asplenium_paucivenosum	72	4	Lin, Y. X., & Viane, R. (2013). Aspleniaceae. In Z. Y. Wu, P. H. Raven & D. Y. Hong [eds.], Flora of China, Vol. 2–3 (Pteridophytes), 267–316, Science Press (Beijing) & Missouri Botanical Garden (St. Louis).
Asplenium_paucivenosum	144	8	Bir, S. S. (1960). Cytological observations on the East Himalayan members of AspleniumLinn. Current Science, 29(11), 445-447.
Asplenium_pauperequitum	144	8	Dawson, M. I. (2008). Index of chromosome numbers of indigenous New Zealand vascular plants. Land Care Research, New Zealand. https://www.landcareresearch.co.nz/uploads/public/researchpubs/chromosome2008.pdf
Asplenium_pellucidum	72	4	Bir, S. S. (1960). Cytological observations on the East Himalayan members of AspleniumLinn. Current Science, 29(11), 445-447.
Asplenium_petrarchae	72	4	Areces, M. P. F., & Carro, F. J. P. (1996). Híbridos del género Asplenium L. (Aspleniaceae) en la Península Ibérica. Anales del Jardín Botánico de Madrid, 54, 106-125.
Asplenium_petrarchae	72	4	Carro, F. J. P., & Areces, M. P. F. (1992). Asplenium petrarchae nothosubsp. diazii (Aspleniaceae, Pteridophyta), un híbrido natural nuevo para la flora levantina y precisiones sobre sus progenitores. Anales del Jardín Botánico de Madrid, 50, 15-25.
Asplenium_petrarchae	72	4	Emmott, J. I. (1964). A cytogenetic investigation in a Phyllitis‐Asplenium complex. New Phytologist, 63(3), 306-318.
Asplenium_phillipsianum	72	4	Bir, S. S. & S. Kumari. 1985. Chromosomal studies on the Indian legumes. In V. R. Reddi & M. K. Rao [eds.], Cytogenetics of Higher Plants: Chromosome Structure and Behaviour. 39-41.
Asplenium_phillipsianum	72	4	Schneider, H., et al. (2017). Neo-and Paleopolyploidy contribute to the species diversity of Asplenium-the most species-rich genus of ferns. Journal of Systematics and Evolution, 55(4), 353-364.
Asplenium_phyllitidis	72	4	Lin, Y. X., & Viane, R. (2013). Aspleniaceae. In Z. Y. Wu, P. H. Raven & D. Y. Hong [eds.], Flora of China, Vol. 2–3 (Pteridophytes), 267–316, Science Press (Beijing) & Missouri Botanical Garden (St. Louis).
Asplenium_platyneuron	36	2	Windham, M. D. (1983). The ferns of Elden Mountain, Arizona. American Fern Journal, 73(3), 85-93.
Asplenium_platyneuron	36	2	Wagner, W. H., & Wagner, F. S. (1966). Pteridophytes of the mountain lake aras, Gilles Co., Virginia: Biosystematic Studies 1964–65. Castanea, 31, 121-140.
Asplenium_polyodon	36	2	Dawson, M. I. (2008). Index of chromosome numbers of indigenous New Zealand vascular plants. Land Care Research, New Zealand. https://www.landcareresearch.co.nz/uploads/public/researchpubs/chromosome2008.pdf
Asplenium_polyodon	72	4	Dawson, M. I. (2008). Index of chromosome numbers of indigenous New Zealand vascular plants. Land Care Research, New Zealand. https://www.landcareresearch.co.nz/uploads/public/researchpubs/chromosome2008.pdf
Asplenium_polyodon	72	4	Brownsey, P. J. (1977). A taxonomic revision of the New Zealand species of Asplenium. New Zealand Journal of Botany, 15(1), 39-86.
Asplenium_polyodon	72	4	Tindale, M. D., & Roy, S. K. (2002). A cytotaxonomic survey of the Pteridophyta of Australia. Australian Systematic Botany, 15(6), 839-937.
Asplenium_polyodon	108	6	Lin, Y. X., & Viane, R. (2013). Aspleniaceae. In Z. Y. Wu, P. H. Raven & D. Y. Hong [eds.], Flora of China, Vol. 2–3 (Pteridophytes), 267–316, Science Press (Beijing) & Missouri Botanical Garden (St. Louis).
Asplenium_polyodon	180	10	Lin, Y. X., & Viane, R. (2013). Aspleniaceae. In Z. Y. Wu, P. H. Raven & D. Y. Hong [eds.], Flora of China, Vol. 2–3 (Pteridophytes), 267–316, Science Press (Beijing) & Missouri Botanical Garden (St. Louis).
Asplenium_praemorsum	144	8	Walker, T. G. (1966). A cytotaxonomic survey of the pteridophytes of Jamaica. Transactions of the Royal Society of Edinburgh, 66, 169–237.
Asplenium_prolongatum	72	4	Lin, Y. X., & Viane, R. (2013). Aspleniaceae. In Z. Y. Wu, P. H. Raven & D. Y. Hong [eds.], Flora of China, Vol. 2–3 (Pteridophytes), 267–316, Science Press (Beijing) & Missouri Botanical Garden (St. Louis).
Asplenium_protensum	144	8	Schneider, H., et al. (2017). Neo-and Paleopolyploidy contribute to the species diversity of Asplenium-the most species-rich genus of ferns. Journal of Systematics and Evolution, 55(4), 353-364.
Asplenium_protomajoricum	72	4	Moral, C. P., & Nieto, A. H. (1997). Nuevas citas para tres híbridos de Asplenium (Aspleniaceae, Pteridophyta) en la Península Ibérica, Acta Botanica Malacitana, 22, 19-27.
Asplenium_pseudolaserpitiifolium	144	8	Lin, Y. X., & Viane, R. (2013). Aspleniaceae. In Z. Y. Wu, P. H. Raven & D. Y. Hong [eds.], Flora of China, Vol. 2–3 (Pteridophytes), 267–316, Science Press (Beijing) & Missouri Botanical Garden (St. Louis).
Asplenium_pseudopraemorsum	72	4	Schneider, H., et al. (2017). Neo-and Paleopolyploidy contribute to the species diversity of Asplenium-the most species-rich genus of ferns. Journal of Systematics and Evolution, 55(4), 353-364.
Asplenium_pteropus	36	2	Mickel, J. T., Wagner, W. H., & Chen, K. L. (1966). Chromosome observations on the ferns of Mexico. Caryologia, 19(1), 95-102.
Asplenium_pulcherrimum	72	4	Lin, Y. X., & Viane, R. (2013). Aspleniaceae. In Z. Y. Wu, P. H. Raven & D. Y. Hong [eds.], Flora of China, Vol. 2–3 (Pteridophytes), 267–316, Science Press (Beijing) & Missouri Botanical Garden (St. Louis).
Asplenium_pumilum	36	2	Walker, T. G. (1966). A cytotaxonomic survey of the pteridophytes of Jamaica. Transactions of the Royal Society of Edinburgh, 66, 169–237.
Asplenium_pumilum	36	2	Lin, Y. X., & Viane, R. (2013). Aspleniaceae. In Z. Y. Wu, P. H. Raven & D. Y. Hong [eds.], Flora of China, Vol. 2–3 (Pteridophytes), 267–316, Science Press (Beijing) & Missouri Botanical Garden (St. Louis).
Asplenium_radicans	36	2	Wagner, W. H., & Wagner, F. S. (1966). Pteridophytes of the Mountain Lake Area, Giles Co., Virginia: biosystematic studies, 1964-65. Castanea, 31(2), 121-140.
Asplenium_radicans	36	2	Wagner, W. H., Farrar, D. R., & McAlpin, B. W. (1970). Pteridology of the highlands biological station area, southern Appalachians. Journal of the Elisha Mitchell Scientific Society, 1-27.
Asplenium_radicans	36	2	Wagner, W. H. (1953). A cytological study of the Appalachian spleenworts. American Fern Journal, 43(3), 109-114.
Asplenium_radicans	72	4	Walker, T. G. (1966). A cytotaxonomic survey of the pteridophytes of Jamaica. Transactions of the Royal Society of Edinburgh, 66, 169–237.
Asplenium_radicans	144	8	Walker, T. G. (1966). A cytotaxonomic survey of the pteridophytes of Jamaica. Transactions of the Royal Society of Edinburgh, 66, 169–237.
Asplenium_resiliens	108	3	Morzenti, V. M. (1966). Morphological and cytological data on southeastern United States species of the Asplenium heterochroum-resiliens complex. American Fern Journal, 56(4), 167-177.
Asplenium_resiliens	108	3	Wagner, W. H. (1963). A biosystematic survey of United States ferns: Preliminary abstract. American Fern Journal, 53(1), 1-16.
Asplenium_resiliens	108	3	Wagner, W. H., & Wagner, F. S. (1966). Pteridophytes of the Mountain Lake Area, Giles Co., Virginia: biosystematic studies, 1964-65. Castanea, 31(2), 121-140.
Asplenium_resiliens	108	6	Haufler, C. H., & Soltis, D. E. (1986). Genetic evidence suggests that homosporous ferns with high chromosome numbers are diploid. Proceedings of the National Academy of Sciences, 83(12), 4389-4393.
Asplenium_rhizophyllum	36	2	Flora of North America @ eFloras (2008). Published on the Internet http://www.efloras.org/flora_page.aspx?flora_id=1 [accessed 31 August 2023], Missouri Botanical Garden, St. Louis, MO & Harvard University Herbaria, Cambridge, MA.
Asplenium_richardii	144	8	Dawson, M. I. (2008). Index of chromosome numbers of indigenous New Zealand vascular plants. Land Care Research, New Zealand. https://www.landcareresearch.co.nz/uploads/public/researchpubs/chromosome2008.pdf
Asplenium_ritoense	72	4	Lin, Y. X., & Viane, R. (2013). Aspleniaceae. In Z. Y. Wu, P. H. Raven & D. Y. Hong [eds.], Flora of China, Vol. 2–3 (Pteridophytes), 267–316, Science Press (Beijing) & Missouri Botanical Garden (St. Louis).
Asplenium_ruprechtii	36	2	Lin, Y. X., & Viane, R. (2013). Aspleniaceae. In Z. Y. Wu, P. H. Raven & D. Y. Hong [eds.], Flora of China, Vol. 2–3 (Pteridophytes), 267–316, Science Press (Beijing) & Missouri Botanical Garden (St. Louis).
Asplenium_ruta-muraria	36	2	Rasbach, H., Rasbach, K., Reichstein, T., & Viane, R. L. L. (1992). The status of Asplenium eberlei D. E. Meyer (Aspleniaceae: Pteridophyta). Fern Gazette, 14, 127–136.
Asplenium_ruta-muraria	72	4	Manton, I. (1950). Problems of cytology and evolution in the Pteridophyta. Cambridge: Cambridge University Press.
Asplenium_ruta-muraria	72	4	Haufler, C. H., & Soltis, D. E. (1986). Genetic evidence suggests that homosporous ferns with high chromosome numbers are diploid. Proceedings of the National Academy of Sciences, 83(12), 4389-4393.
Asplenium_ruta-muraria	72	4	Bouharmont, J. (1972). Origine de la polyploidie chez Asplenium ruta-muraria L. Bulletin du Jardin botanique national de Belgique/Bulletin van de Nationale Plantentuin van Belgie, 42, 375-383.
Asplenium_ruta-muraria	72	4	Vida, G. (1970). The nature of polyploidy in Asplenium ruta-muraria L. and A. lepidum C. Presl. Caryologia, 23(4), 525-547.
Asplenium_ruta-muraria	72	4	Meyer, D. E. (1960). Hybrids in the genus Asplenium found in Northwestern and Central Europe. American Fern Journal, 50(1), 138-145.
Asplenium_rutifolium	70	4	Schneider, H., et al. (2017). Neo-and Paleopolyploidy contribute to the species diversity of Asplenium-the most species-rich genus of ferns. Journal of Systematics and Evolution, 55(4), 353-364.
Asplenium_rutifolium	140	8	Schneider, H., et al. (2017). Neo-and Paleopolyploidy contribute to the species diversity of Asplenium-the most species-rich genus of ferns. Journal of Systematics and Evolution, 55(4), 353-364.
Asplenium_sagittatum	36	2	Manton, I. (1950). Problems of cytology and evolution in the Pteridophyta. Cambridge: Cambridge University Press.
Asplenium_sagittatum	36	2	Emmott, J. I. (1964). A cytogenetic investigation in a Phyllitis‐Asplenium complex. New Phytologist, 63(3), 306-318.
Asplenium_salicifolium	144	8	Walker, T. G. (1985). Cytotaxonomic studies of the ferns of Trinidad. 2. The cytological and taxonomical implications. Bulletin of the British Museum (Natural History) Botany, 13, 149-249.
Asplenium_sampsonii	180	10	Schneider, H., et al. (2017). Neo-and Paleopolyploidy contribute to the species diversity of Asplenium-the most species-rich genus of ferns. Journal of Systematics and Evolution, 55(4), 353-364.
Asplenium_sandersonii	72	4	Schneider, H., et al. (2017). Neo-and Paleopolyploidy contribute to the species diversity of Asplenium-the most species-rich genus of ferns. Journal of Systematics and Evolution, 55(4), 353-364.
Asplenium_sarelii	36	2	Lin, Y. X., & Viane, R. (2013). Aspleniaceae. In Z. Y. Wu, P. H. Raven & D. Y. Hong [eds.], Flora of China, Vol. 2–3 (Pteridophytes), 267–316, Science Press (Beijing) & Missouri Botanical Garden (St. Louis).
Asplenium_sarelii	36	2	Schneider, H., et al. (2017). Neo-and Paleopolyploidy contribute to the species diversity of Asplenium-the most species-rich genus of ferns. Journal of Systematics and Evolution, 55(4), 353-364.
Asplenium_sarelii	72	4	Khullar, S.P., Sharma, S.S., Verma, S.C. (1988). SOCGI plant chromosome number reports – VI. Journal of Cytology and Genetics, 23, 38–52.
Asplenium_sarelii	72	4	Mitui, K. (1968). Chromosomes and speciation in ferns. Science Reports of the Tokyo Kyoiku Daigaku. Section B, Zoology and Botany, 203, 285–333.
Asplenium_scalare	72	4	Schneider, H., et al. (2017). Neo-and Paleopolyploidy contribute to the species diversity of Asplenium-the most species-rich genus of ferns. Journal of Systematics and Evolution, 55(4), 353-364.
Asplenium_scleroprium	144	8	Schneider, H., et al. (2017). Neo-and Paleopolyploidy contribute to the species diversity of Asplenium-the most species-rich genus of ferns. Journal of Systematics and Evolution, 55(4), 353-364.
Asplenium_scolopendrium	36	2	Emmott, J. I. (1964). A cytogenetic investigation in a Phyllitis‐Asplenium complex. New Phytologist, 63(3), 306-318.
Asplenium_scolopendrium	36	2	Queirós, M., & Nogueira, I. (1989). Estudos cromossómicos em Pteridophyta de Portugal. Anales del Jardín Botánico de Madrid, 46, 563-569.
Asplenium_scolopendrium	72	4	Emmott, J. I. (1964). A cytogenetic investigation in a Phyllitis‐Asplenium complex. New Phytologist, 63(3), 306-318.
Asplenium_scolopendrium	72	4	Britton, D. M. (1953). Chromosome studies on ferns. American Journal of Botany, 40, 575-583.
Asplenium_scortechinii	72	4	Schneider, H., et al. (2017). Neo-and Paleopolyploidy contribute to the species diversity of Asplenium-the most species-rich genus of ferns. Journal of Systematics and Evolution, 55(4), 353-364.
Asplenium_scortechinii	108	6	Schneider, H., et al. (2017). Neo-and Paleopolyploidy contribute to the species diversity of Asplenium-the most species-rich genus of ferns. Journal of Systematics and Evolution, 55(4), 353-364.
Asplenium_scortechinii	216	12	Schneider, H., et al. (2017). Neo-and Paleopolyploidy contribute to the species diversity of Asplenium-the most species-rich genus of ferns. Journal of Systematics and Evolution, 55(4), 353-364.
Asplenium_seelosii	36	2	Meyer, D. E. (1967). Uber neue und seltene Asplenien Mitteleuropas, 4. Mitteilung. Berichte der Deutschen Botanischen Gesellschaft, 80, 28-39.
Asplenium_septentrionale	36	2	Bouharmont, J. (1972). Meiosis in apogamously produced diploid plants of Asplenium septentrionale. British Fern Gazette, 10, 237-240.
Asplenium_septentrionale	72	4	Löve, A., & Kjellqvist, E. (1972). Cytotaxonomy of Spanish plants. I. Introduction. Pteridophyta and Gymnospermae. Lagascalia, 2(1), 23-35.
Asplenium_septentrionale	72	4	Meyer, D. E. (1960). Hybrids in the genus Asplenium found in Northwestern and Central Europe. American Fern Journal, 50(1), 138-145.
Asplenium_septentrionale	72	4	Callé, J., Lovis, J. D., & Reichstein, T. (1975). Asplenium × contrei (A. adiantum-nigrum × A. septentrionale) hybr. nova et la vraie ascendance de l'Asplenium × souchei Litard. Candollea, 30, 189–201.
Asplenium_serra	72	4	Jarrett, F. M., Manton, I., & Roy, S. K. (1968). Cytological and taxonomic notes on a small collection of living ferns from Galapagos. Kew Bulletin, 22(3), 475-480.
Asplenium_serra	144	8	Schneider, H., et al. (2017). Neo-and Paleopolyploidy contribute to the species diversity of Asplenium-the most species-rich genus of ferns. Journal of Systematics and Evolution, 55(4), 353-364.
Asplenium_serratum	72	4	Flora of North America @ eFloras (2008). Published on the Internet http://www.efloras.org/flora_page.aspx?flora_id=1 [accessed 31 August 2023], Missouri Botanical Garden, St. Louis, MO & Harvard University Herbaria, Cambridge, MA.
Asplenium_serratum	144	8	Guillén, R. H., & Daviña, J. R. (2005). Estudios cromosómicos en especies de Asplenium (Aspleniaceae) de la Argentina. Darwiniana, 43, 44-51.
Asplenium_serricula	72	4	Schneider, H., et al. (2017). Neo-and Paleopolyploidy contribute to the species diversity of Asplenium-the most species-rich genus of ferns. Journal of Systematics and Evolution, 55(4), 353-364.
Asplenium_sessilifolium	36	2	Schneider, H., et al. (2017). Neo-and Paleopolyploidy contribute to the species diversity of Asplenium-the most species-rich genus of ferns. Journal of Systematics and Evolution, 55(4), 353-364.
Asplenium_shikokianum	72	4	Mitui, K. (1968). Chromosomes and speciation in ferns. Science Reports of the Tokyo Kyoiku Daigaku. Section B, Zoology and Botany, 203, 285–333.
Asplenium_shimurae	72	4	Schneider, H., et al. (2017). Neo-and Paleopolyploidy contribute to the species diversity of Asplenium-the most species-rich genus of ferns. Journal of Systematics and Evolution, 55(4), 353-364.
Asplenium_shuttleworthianum	144	8	Dawson, M. I. (2008). Index of chromosome numbers of indigenous New Zealand vascular plants. Land Care Research, New Zealand. https://www.landcareresearch.co.nz/uploads/public/researchpubs/chromosome2008.pdf
Asplenium_simplicifrons	72	4	Tindale, M. D., & Roy, S. K. (2002). A cytotaxonomic survey of the Pteridophyta of Australia. Australian Systematic Botany, 15(6), 839-937.
Asplenium_splendens	72	4	Braithwaite, A. F. (1972). The cytotaxonomy of the Asplenium splendens complex in South Africa. Journal of South African Botany, 38, 9-27.
Asplenium_subglandulosum	36	2	Schneider, H., et al. (2017). Neo-and Paleopolyploidy contribute to the species diversity of Asplenium-the most species-rich genus of ferns. Journal of Systematics and Evolution, 55(4), 353-364.
Asplenium_subglandulosum	36	2	Fabbri, F. (1965). Secondo supplemento alle tavole cromosomiche delle Pteridophyta di Alberto Chiarugi. Caryologia, 18(4), 675-731.
Asplenium_subglandulosum	72	4	Fabbri, F. (1965). Secondo supplemento alle tavole cromosomiche delle Pteridophyta di Alberto Chiarugi. Caryologia, 18(4), 675-731.
Asplenium_subglandulosum	72	4	Schneider, H., et al. (2017). Neo-and Paleopolyploidy contribute to the species diversity of Asplenium-the most species-rich genus of ferns. Journal of Systematics and Evolution, 55(4), 353-364.
Asplenium_sulcatum	72	4	Walker, T. G. (1966). A cytotaxonomic survey of the pteridophytes of Jamaica. Transactions of the Royal Society of Edinburgh, 66, 169–237.
Asplenium_surrogatum	36	2	Tindale, M. D., & Roy, S. K. (2002). A cytotaxonomic survey of the Pteridophyta of Australia. Australian Systematic Botany, 15(6), 839-937.
Asplenium_tenerum	72	4	Manton, I., & Sledge, W. A. (1954). Observations on the cytology and taxonomy of the pteridophyte flora of Ceylon. Philosophical Transactions of the Royal Society of London. Series B, Biological Sciences, 238, 127-185.
Asplenium_tenuifolium	36	2	Bir, S. S. (1960). Cytological observations on the East Himalayan members of AspleniumLinn. Current Science, 29(11), 445-447.
Asplenium_tenuifolium	36	2	Irudayaraj, V., & Bir, S. S. (1994). Cytology of some ferns from the Niligris, South India II. Fern Gazette, 14, 301-312.
Asplenium_tenuifolium	72	4	Lin, Y. X., & Viane, R. (2013). Aspleniaceae. In Z. Y. Wu, P. H. Raven & D. Y. Hong [eds.], Flora of China, Vol. 2–3 (Pteridophytes), 267–316, Science Press (Beijing) & Missouri Botanical Garden (St. Louis).
Asplenium_theciferum	70	4	Schneider, H., et al. (2017). Neo-and Paleopolyploidy contribute to the species diversity of Asplenium-the most species-rich genus of ferns. Journal of Systematics and Evolution, 55(4), 353-364.
Asplenium_theciferum	140	8	Schneider, H., et al. (2017). Neo-and Paleopolyploidy contribute to the species diversity of Asplenium-the most species-rich genus of ferns. Journal of Systematics and Evolution, 55(4), 353-364.
Asplenium_thunbergii	72	4	Schneider, H., et al. (2017). Neo-and Paleopolyploidy contribute to the species diversity of Asplenium-the most species-rich genus of ferns. Journal of Systematics and Evolution, 55(4), 353-364.
Asplenium_trichomanes	36	2	Emmott, J. I. (1964). A cytogenetic investigation in a Phyllitis‐Asplenium complex. New Phytologist, 63(3), 306-318.
Asplenium_trichomanes	36	2	Windham, M. D. (1983). The ferns of Elden Mountain, Arizona. American Fern Journal, 73(3), 85-93.
Asplenium_trichomanes	36	2	Punetha, N. (1989). Cytological observations on ferns of Kumaon (NW Himalaya). Plant science research in India, 11, 459-465.
Asplenium_trichomanes	36	2	Haufler, C. H., & Soltis, D. E. (1986). Genetic evidence suggests that homosporous ferns with high chromosome numbers are diploid. Proceedings of the National Academy of Sciences, 83(12), 4389-4393.
Asplenium_trichomanes	72	4	Haufler, C. H., & Soltis, D. E. (1986). Genetic evidence suggests that homosporous ferns with high chromosome numbers are diploid. Proceedings of the National Academy of Sciences, 83(12), 4389-4393.
Asplenium_trichomanes	72	4	Razdan, B., Kachroo, P., & Bir, S. S. (1986). Cytomorphology of the ferns of Kashmir-I Asplenaciace. Indian Fern Journal, 3, 111–120.
Asplenium_trichomanes	72	4	Tindale, M. D., & Roy, S. K. (2002). A cytotaxonomic survey of the Pteridophyta of Australia. Australian Systematic Botany, 15(6), 839-937.
Asplenium_trichomanes	72	4	Emmott, J. I. (1964). A cytogenetic investigation in a Phyllitis‐Asplenium complex. New Phytologist, 63(3), 306-318.
Asplenium_trichomanes	108	6	Bennert, H. W., Pichi Shrmolli, R. E., Rasbach, H., Rasbach, K., & Reichstein, T. (1989). Asplenium x helii Lusina, the valid name for the hybrids between A. petrarchae (Guérin) DC. and A. trichomanes L.(Aspleniaceae, Pterido-phyta). II. Detailed description and illustrations. Webbia, 43(2), 311-337.
Asplenium_trichomanes	144	8	Razdan, B., Kachroo, P., & Bir, S. S. (1986). Cytomorphology of the ferns of Kashmir-I Asplenaciace. Indian Fern Journal, 3, 111–120.
Asplenium_trigonopterum	144	8	Schneider, H., et al. (2017). Neo-and Paleopolyploidy contribute to the species diversity of Asplenium-the most species-rich genus of ferns. Journal of Systematics and Evolution, 55(4), 353-364.
Asplenium_triphyllum	72	4	Löve, Á., Löve, D., & Pichi-Sermolli, R. E. G. (1977) Cytotaxonomical atlas of the Pteridophyta, vol 3, Vaduz, Liechtenstein: J. Cramer.
Asplenium_tripteropus	36	2	Lin, Y. X., & Viane, R. (2013). Aspleniaceae. In Z. Y. Wu, P. H. Raven & D. Y. Hong [eds.], Flora of China, Vol. 2–3 (Pteridophytes), 267–316, Science Press (Beijing) & Missouri Botanical Garden (St. Louis).
Asplenium_tripteropus	72	4	Lin, Y. X., & Viane, R. (2013). Aspleniaceae. In Z. Y. Wu, P. H. Raven & D. Y. Hong [eds.], Flora of China, Vol. 2–3 (Pteridophytes), 267–316, Science Press (Beijing) & Missouri Botanical Garden (St. Louis).
Asplenium_variabile	72	4	Schneider, H., et al. (2017). Neo-and Paleopolyploidy contribute to the species diversity of Asplenium-the most species-rich genus of ferns. Journal of Systematics and Evolution, 55(4), 353-364.
Asplenium_variabile	144	8	Schneider, H., et al. (2017). Neo-and Paleopolyploidy contribute to the species diversity of Asplenium-the most species-rich genus of ferns. Journal of Systematics and Evolution, 55(4), 353-364.
Asplenium_vieillardii	144	4	Fabbri, F. (1965). Secondo supplemento alle tavole cromosomiche delle Pteridophyta di Alberto Chiarugi. Caryologia, 18(4), 675-731.
Asplenium_viride	36	2	Fabbri, F. (1965). Secondo supplemento alle tavole cromosomiche delle Pteridophyta di Alberto Chiarugi. Caryologia, 18(4), 675-731.
Asplenium_wilfordii	72	4	Lin, Y. X., & Viane, R. (2013). Aspleniaceae. In Z. Y. Wu, P. H. Raven & D. Y. Hong [eds.], Flora of China, Vol. 2–3 (Pteridophytes), 267–316, Science Press (Beijing) & Missouri Botanical Garden (St. Louis).
Asplenium_wrightii	72	4	Lin, Y. X., & Viane, R. (2013). Aspleniaceae. In Z. Y. Wu, P. H. Raven & D. Y. Hong [eds.], Flora of China, Vol. 2–3 (Pteridophytes), 267–316, Science Press (Beijing) & Missouri Botanical Garden (St. Louis).
Asplenium_wrightii	144	8	Lin, Y. X., & Viane, R. (2013). Aspleniaceae. In Z. Y. Wu, P. H. Raven & D. Y. Hong [eds.], Flora of China, Vol. 2–3 (Pteridophytes), 267–316, Science Press (Beijing) & Missouri Botanical Garden (St. Louis).
Asplenium_wrightii	144	8	Mitui, K. (1967). Chromosome studies on Japanese ferns (3). Journal of Japanese Botany, 42, 105–110.
Asplenium_yoshinagae	72	4	Bir, S. S., Irudayaraj, V., & Singh, S. (1994). Biosystematic studies on the asplenioid and athyrioid genera from the Himalayas: Results of chromosomal analysis on population basis. Indian Fern Journal, 11, 82–88.
Asplenium_yoshinagae	72	4	Lin, Y. X., & Viane, R. (2013). Aspleniaceae. In Z. Y. Wu, P. H. Raven & D. Y. Hong [eds.], Flora of China, Vol. 2–3 (Pteridophytes), 267–316, Science Press (Beijing) & Missouri Botanical Garden (St. Louis).
Asplenium_yoshinagae	144	8	Lin, Y. X., & Viane, R. (2013). Aspleniaceae. In Z. Y. Wu, P. H. Raven & D. Y. Hong [eds.], Flora of China, Vol. 2–3 (Pteridophytes), 267–316, Science Press (Beijing) & Missouri Botanical Garden (St. Louis).
Hymenasplenium_apogamum	39	2	Cheng, X., & Murakami, N. (1998). Cytotaxonomic study of genus Hymenasplenium (Aspleniaceae) in Xishuangbanna, southwestern China. Journal of Plant Research, 111, 495–500
Hymenasplenium_apogamum	117	3	Murakami, N. (1995). Systematics and evolutionary biology of the fern genus Hymenasplenium (Aspleniaceae). Journal of Plant Research, 108, 257-268.
Hymenasplenium_apogamum	117	3	Cheng, X., & Murakami, N. (1998). Cytotaxonomic study of genus Hymenasplenium (Aspleniaceae) in Xishuangbanna, southwestern China. Journal of Plant Research, 111, 495–500
Hymenasplenium_apogamum	78	4	Cheng, X., & Murakami, N. (1998). Cytotaxonomic study of genus Hymenasplenium (Aspleniaceae) in Xishuangbanna, southwestern China. Journal of Plant Research, 111, 495–500
Hymenasplenium_cardiophyllum	38	2	Schneider, H., et al. (2017). Neo-and Paleopolyploidy contribute to the species diversity of Asplenium-the most species-rich genus of ferns. Journal of Systematics and Evolution, 55(4), 353-364.
Hymenasplenium_cheilosorum	117	3	Murakami, N. (1995). Systematics and evolutionary biology of the fern genus Hymenasplenium (Aspleniaceae). Journal of Plant Research, 108, 257-268.
Hymenasplenium_excisum	39	2	Murakami, N. (1995). Systematics and evolutionary biology of the fern genus Hymenasplenium (Aspleniaceae). Journal of Plant Research, 108, 257-268.
Hymenasplenium_excisum	78	4	Murakami, N. (1995). Systematics and evolutionary biology of the fern genus Hymenasplenium (Aspleniaceae). Journal of Plant Research, 108, 257-268.
Hymenasplenium_hondoense	39	2	Schneider, H., et al. (2017). Neo-and Paleopolyploidy contribute to the species diversity of Asplenium-the most species-rich genus of ferns. Journal of Systematics and Evolution, 55(4), 353-364.
Hymenasplenium_hondoense	117	3	Murakami, N. (1995). Systematics and evolutionary biology of the fern genus Hymenasplenium (Aspleniaceae). Journal of Plant Research, 108, 257-268.
Hymenasplenium_laetum	36	2	Schneider, H., et al. (2017). Neo-and Paleopolyploidy contribute to the species diversity of Asplenium-the most species-rich genus of ferns. Journal of Systematics and Evolution, 55(4), 353-364.
Hymenasplenium_obliquissimum	39	2	Murakami, N. (1995). Systematics and evolutionary biology of the fern genus Hymenasplenium (Aspleniaceae). Journal of Plant Research, 108, 257-268.
Hymenasplenium_obliquissimum	117	3	Murakami, N. (1995). Systematics and evolutionary biology of the fern genus Hymenasplenium (Aspleniaceae). Journal of Plant Research, 108, 257-268.
Hymenasplenium_obliquissimum	78	4	Murakami, N. (1995). Systematics and evolutionary biology of the fern genus Hymenasplenium (Aspleniaceae). Journal of Plant Research, 108, 257-268.
Hymenasplenium_obscurum	39	2	Cheng, X., & Murakami, N. (1998). Cytotaxonomic study of genus Hymenasplenium (Aspleniaceae) in Xishuangbanna, southwestern China. Journal of Plant Research, 111, 495–500
Hymenasplenium_obscurum	78	4	Murakami, N. (1995). Systematics and evolutionary biology of the fern genus Hymenasplenium (Aspleniaceae). Journal of Plant Research, 108, 257-268.
Hymenasplenium_riparium	78	2	Schneider, H., et al. (2017). Neo-and Paleopolyploidy contribute to the species diversity of Asplenium-the most species-rich genus of ferns. Journal of Systematics and Evolution, 55(4), 353-364.
Hymenasplenium_subnormale	38	2	Murakami, N. (1995). Systematics and evolutionary biology of the fern genus Hymenasplenium (Aspleniaceae).?Journal of Plant Research,?108, 257-268.
Hymenasplenium_subnormale	38	2	Chang, Y. (2017). Polyploidy and the formation of species diversity in Aspleniaceae, Biodiversity Science, 25(6), 621-626.
Hymenasplenium_subnormale	76	4	Murakami, N. (1995). Systematics and evolutionary biology of the fern genus Hymenasplenium (Aspleniaceae). Journal of Plant Research, 108, 257-268.
Hymenasplenium_subnormale	76	4	Chang, Y. (2017). Polyploidy and the formation of species diversity in Aspleniaceae, Biodiversity Science, 25(6), 621-626.
Hymenasplenium_triquetrum	72	4	Schneider, H., et al. (2017). Neo-and Paleopolyploidy contribute to the species diversity of Asplenium-the most species-rich genus of ferns. Journal of Systematics and Evolution, 55(4), 353-364.
Hymenasplenium_unilaterale	39	2	Kato, M., Nakato, N., Cheng, X., & Iwatsuki, K. (1992). Cytotaxonomic study of ferns of Yunnan, southwestern China. The botanical magazine= Shokubutsu-gaku-zasshi, 105, 105-124.

## Sheet: S3
Supplementary Data 3. Explanatory dataset for BRT modeling
ECO_ID	ECO_NAME	SR_diploid	SR_polyploid	SR_multiple	SR_unknown	PD	PE	NTI	Bio_1	Bio_4	Bio_12	Bio_15	Ele	Soil_WC	Soil_pH	Soil_OC	Soil_CEC	HF	CV_Bio1	CV_Bio12	Ele_het	Bio1_het	Bio4_het	Bio12_het	Bio15_het
0	Rock and Ice	0	0	0	0	-9999	-9999	-9999	-36.0528	979.052	147.949	105.401	2354.27	29.6348	66.9991	174.647	48.8724	0.721886	-49.016	-90.9825	2351.44	0.038111	0.858473	0.739746	0.878636
1	Albertine Rift montane forests	1	6	6	11	0.148	0.004	2.37822	19.3376	54.7291	1363.38	52.4609	1566.85	24.8927	53.6372	48.8637	18.3667	24.9815	-165.287	-115.524	1565.16	0.263957	0.930757	17.7556	0.334866
2	Cameroon Highlands forests	1	7	3	7	0.121	0.003	1.65227	22.4213	124.476	1918.68	79.9898	1160.5	26.8118	54.7342	84.7321	28.9483	23.7661	-165.331	-110.263	1159.63	0.273192	1.41012	12.5894	0.307902
3	Central Congolian lowland forests	0	0	0	0	-9999	-9999	-9999	24.8415	50.4679	1864.25	32.8922	425.104	18.926	45.6953	33.145	8.56656	15.2436	-182.392	-116.849	425.097	0.041132	0.561212	3.6366	0.111446
4	Comoros forests	1	5	6	1	0.104	0.002	1.3999	23.4483	127.648	2014.04	60.8567	459.558	28.6825	53.2347	47.0958	30.6273	34.7232	-80.8	-59.2	428.814	0.493792	1.16894	34.2712	1.07696
5	Congolian coastal forests	0	7	3	4	0.1	0.003	1.57634	24.6558	117.231	1953.58	69.1387	318.36	22.1698	48.7434	33.8307	14.3404	16.845	-166.084	-105.076	317.962	0.105497	0.685663	8.72219	0.142599
6	Cross-Niger transition forests	0	0	0	0	-9999	-9999	-9999	26.4885	100.131	2267.48	66.6518	79.6699	14.9313	53.8792	44.3376	10.0455	31.6469	-57	-108.131	79.6728	0.038192	0.604005	7.23387	0.134362
7	Cross-Sanaga-Bioko coastal forests	1	7	3	6	0.121	0.003	1.17113	25.497	95.5403	2438.01	69.5764	308.515	20.4413	51.8657	36.5815	15.3134	26.349	-108.055	-61.3767	308.439	0.144177	1.02052	9.89161	0.247691
8	East African montane forests	1	6	6	11	0.144	0.003	2.70856	17.4065	91.3326	1197.25	57.5668	1951.04	27.8593	58.8262	62.2682	29.21	27.6499	-163.653	-111.183	1948.92	0.280682	1.03316	25.7349	0.808367
9	Eastern Arc forests	2	7	8	11	0.176	0.004	2.17047	19.3711	164.217	1203.86	83.6442	1394.29	23.6271	55.8656	36.053	17.6704	19.3526	-175.645	-133.138	1390.07	0.395544	1.75922	27.137	0.787578
10	Eastern Congolian swamp forests	0	1	1	0	0.023	0.001	2.11716	25.181	53.5185	1863.49	30.058	360.191	18.4634	46.6179	50.5567	8.38324	22.2938	-186.21	-116.428	360.203	0.021788	0.539686	3.87794	0.099273
11	Eastern Guinean forests	0	5	3	2	0.083	0.002	1.35304	26.0715	110.356	1353.45	60.1262	190.98	16.9302	55.1871	19.5824	11.8807	29.7776	-61.9446	-94.4714	190.759	0.073139	0.636088	5.01008	0.207952
12	Ethiopian montane forests	1	5	2	7	0.091	0.002	3.03449	19.1909	95.3746	1522.88	67.5704	1777.13	30.6544	56.3256	90.0293	37.1778	28.9616	-151.356	-109.936	1773.48	0.22766	1.39375	18.5915	0.416278
13	Granitic Seychelles forests	0	1	1	1	0.039	0.001	0.258023	26.231	71.4063	2259.31	43.6666	180.475	29.1293	56.9311	68.3709	28.6207	48.8397	-16	-82	127.558	0.293024	0.515092	12.6681	0.410131
14	Guinean montane forests	0	2	3	3	0.074	0.001	0.684341	23.6295	147.63	1774.09	92.8225	761.496	25.1224	53.1465	70.369	23.5021	28.8746	-149.116	-114.642	760.527	0.253153	1.61299	6.52768	0.291176
15	Knysna-Amatole montane forests	1	1	1	1	0.049	0.001	0.368944	16.5041	275.636	679.985	19.2408	256.243	19.0601	56.4401	37.7938	21.5066	32.8793	-88.8	-111.25	254.881	0.14383	2.12933	5.4482	0.303171
16	Kwazulu Natal-Cape coastal forests	2	3	2	3	0.071	0.001	3.39884	20.16	253.363	1046.67	42.6622	190.583	20.3614	57.8345	25.4683	16.8426	43.7116	-81.6389	-88.3714	190.986	0.132021	1.39789	5.21264	0.554047
17	Madagascar humid forests	1	9	8	10	0.18	0.008	1.77528	21.8679	235.977	2171.6	61.0742	459.429	23.6481	52.4973	47.4059	19.3616	25.3523	-149.959	-18.5219	457.795	0.192994	1.11045	26.4464	0.684029
18	Madagascar subhumid forests	1	9	9	10	0.19	0.008	1.83934	20.6101	232.435	1358.75	103.597	983.931	18.1809	57.9229	13.8679	13.0737	21.6328	-168.756	-72.0103	983.363	0.238878	1.09775	10.3622	0.425286
19	Maputaland coastal forests and woodlands	1	1	2	0	0.047	0.001	0.592957	22.2605	271.652	786.386	62.4013	92.0223	18.2096	61.7038	18.7499	17.4948	29.1064	-84.8911	-107.071	91.6709	0.057315	1.60964	7.12026	0.364453
20	Mascarene forests	1	4	4	6	0.117	0.004	1.80082	20.2724	224.588	1620.12	51.9596	638.781	29.8092	53.8829	69.6204	33.8817	46.4731	-82.125	14.25	599.381	0.432792	1.76722	23.7215	0.683812
21	Mount Cameroon and Bioko montane forests	1	4	4	7	0.112	0.002	1.68491	19.6186	105.459	2819.02	56.6132	1373.3	30.4841	55.0475	103.294	41.5833	26.736	-143.75	224.75	1366.52	0.653817	2.80872	17.2131	0.93138
22	Niger Delta swamp forests	0	0	0	0	-9999	-9999	-9999	26.4364	91.6104	2708.48	65.7446	18.7733	20.0193	52.4425	47.0464	15.586	27.2833	-49.1163	-103.581	18.7183	0.016769	0.560876	7.81822	0.116349
23	Nigerian lowland forests	0	1	1	0	0.03	0	-0.439289	26.0701	120.986	1650.54	68.1462	159.502	15.5722	56.5013	35.3799	10.7348	30.2408	-68.4205	-111.549	159.413	0.049699	0.638742	5.8273	0.150268
24	Northeast Congolian lowland forests	1	5	2	4	0.093	0.002	1.33676	24.0537	48.6697	1718.31	39.1291	598.994	21.2755	50.9057	36.2432	9.97395	19.6367	-184.101	-115.013	599.106	0.056976	0.607935	4.96213	0.11325
25	Northern Swahili coastal forests	1	5	3	3	0.097	0.002	1.79611	26.3901	121.915	763.73	82.3386	120.392	20.2469	68.3204	12.8253	18.6165	23.188	-56.7977	-118.912	120.281	0.047585	0.746195	7.72181	0.602636
26	Northwest Congolian lowland forests	0	8	3	7	0.122	0.003	1.77501	24.0744	75.8767	1638.47	55.6322	530.686	21.6042	49.9228	21.3099	11.2025	13.592	-183.436	-120.884	530.686	0.057797	0.606413	4.76779	0.110096
27	S? Tom? Pr?cipe, and Annob? forests	1	4	2	1	0.076	0.002	0.857978	22.8098	85.4348	2452.57	59.9637	333.353	29.8396	54.5836	79.0911	35.6946	33.5288	-93.3333	-87.3333	316.565	0.418608	1.53696	92.0565	0.826217
28	Southern Swahili coastal forests and woodlands	2	3	5	5	0.114	0.002	1.62455	24.3386	201.855	1014.64	87.1143	170.992	14.8263	59.3398	14.659	12.0535	21.9268	-113.576	-107.855	170.378	0.069681	0.932487	7.15428	0.362848
29	Western Congolian swamp forests	0	1	0	0	0.016	0	-9999	25.0705	58.4915	1707.09	35.4741	337.699	18.1162	48.7584	57.0499	8.6688	13.8124	-187.346	-116.266	337.733	0.020333	0.536556	3.32492	0.100055
30	Western Guinean lowland forests	1	5	2	2	0.096	0.002	0.0203982	25.6014	89.8267	2428.83	67.6566	225.86	20.2223	51.6724	34.9679	18.6055	28.8083	-120.694	-95.2876	225.639	0.055671	0.724782	6.92639	0.160702
31	Cape Verde Islands dry forests	0	0	3	0	0.043	0	-0.845952	22.1562	171.052	217.178	156.499	368.12	27.1503	74.5796	35.3971	38.3899	26.1788	-117.312	-9999	337.541	0.411972	1.5075	10.9439	2.16466
32	Madagascar dry deciduous forests	0	4	5	5	0.098	0.002	2.31961	25.802	169.257	1420.82	117.9	208.068	15.1247	60.9662	12.9777	12.4116	20.1671	-58.1068	-79.8445	207.482	0.109171	0.820331	7.34753	0.324704
33	Zambezian evergreen dry forests	0	0	0	0	-9999	-9999	-9999	19.9102	246.124	1081.12	102.967	1208.16	15.6962	54.9243	18.7189	8.58503	12.2264	-183.763	-121.137	1208.02	0.044373	0.818492	2.96529	0.103361
34	Angolan mopane woodlands	0	1	1	0	0.029	0	-0.246793	21.7765	286.307	376.991	115.283	1130.47	11.1349	76.5678	1.29714	11.3169	11.4833	-170.103	-117.426	1130.45	0.075351	1.21058	4.25031	0.342067
35	Angolan scarp savanna and woodlands	0	0	0	0	-9999	-9999	-9999	23.5207	165.346	887.865	96.0964	551.917	16.8755	58.7313	17.4654	10.9635	23.8126	-151.72	-116.683	551.552	0.101396	1.19631	12.442	0.53034
36	Angolan wet miombo woodlands	0	1	1	1	0.039	0	0.0921202	20.5428	158.395	1228.85	87.041	1307.73	12.1685	55.4888	9.62078	7.49942	19.7656	-178.934	-120.861	1307.77	0.070028	1.12173	6.8023	0.117717
37	Ascension scrub and grasslands	0	0	0	0	-9999	-9999	-9999	20.2282	140.527	194.535	51.2412	192.606	25.7836	71.9054	83.248	36.6063	-9999	-9999	-9999	183.376	0.30086	1.26213	14.519	2.04277
38	Central bushveld	2	6	4	2	0.115	0.003	1.87134	19.7154	427.543	557.68	84.0398	1084.21	13.8268	64.2391	4.21326	11.3446	25.6727	-154.169	-111.188	1084.42	0.096124	1.77257	7.82962	0.273029
39	Central Zambezian wet miombo woodlands	2	7	4	4	0.115	0.002	2.90543	21.3798	166.042	1148.99	97.7611	1140.8	16.2593	55.333	6.89201	8.81526	20.3917	-172.794	-127.08	1140.88	0.087135	0.939773	4.91123	0.187775
40	Drakensberg Escarpment savanna and thicket	1	3	3	3	0.079	0.002	2.20498	18.0067	295.07	847.109	55.3954	655.14	21.5512	59.67	21.4829	17.7943	30.6835	-124.699	-106.567	657.163	0.214594	1.84784	6.70097	0.571827
41	Drakensberg grasslands	3	6	6	2	0.142	0.003	0.922673	14.428	380.723	762.215	63.6314	1554.26	20.7969	60.8422	18.0423	18.4377	24.9859	-160.87	-115.488	1552.49	0.286786	2.54362	9.40028	0.36878
42	Dry miombo woodlands	1	8	7	10	0.18	0.005	0.906693	22.2514	234.877	947.026	105.465	838.298	14.0106	58.8164	5.26352	10.3168	19.295	-170.186	-116.91	838.246	0.089793	1.00478	5.26418	0.278472
43	East Sudanian savanna	2	6	4	6	0.121	0.004	2.82295	25.5105	160.561	1064.82	94.0285	688.336	23.2497	63.1114	91.0194	22.0778	19.0191	-94.3481	-104.925	689.109	0.072934	0.925475	6.10533	0.221514
44	Guinean forest-savanna	1	5	3	2	0.1	0.002	0.428494	26.4394	152.85	1437.72	88.4219	263.823	19.483	58.0431	62.0224	18.8352	27.2319	-49.6131	-102.225	263.478	0.081596	0.900254	5.32563	0.212796
45	Horn of Africa xeric bushlands	0	0	0	0	-9999	-9999	-9999	24.8951	201.486	171.074	103.479	701.119	14.0605	80.3307	10.3397	17.7527	14.9115	-80.0785	-68.2	700.848	0.06606	0.931457	2.14852	0.558358
46	Itigi-Sumbu thicket	0	0	2	0	0.029	0	-0.229539	23.1573	136.304	804.357	103.087	1128.65	17.005	55.9386	14.1227	13.047	22.2546	-162.897	-119.882	1128.72	0.073846	0.784911	3.19395	0.249323
47	Kalahari Acacia woodlands	0	1	0	0	0.016	0	-9999	22.1468	403.265	402.189	106.493	1158.03	6.94729	70.879	0.441891	5.35861	4.76972	-170.402	-120.158	1158.03	0.019312	0.657455	1.37079	0.199124
48	Limpopo lowveld	1	8	4	2	0.122	0.003	1.35854	21.6869	301.524	724	73.3277	395.166	18.265	62.2671	10.5549	15.7488	22.7244	-114.138	-107.458	396.31	0.116844	2.2533	10.152	0.355579
49	Mandara Plateau woodlands	0	0	0	0	-9999	-9999	-9999	25.0015	207.583	911.017	120.023	717.728	16.2255	62.8004	90.5238	9.04963	32.6828	-131.292	-107.583	717.404	0.195173	1.29744	6.81227	0.200733
50	Masai xeric grasslands and shrublands	0	0	0	0	-9999	-9999	-9999	26.6096	96.7319	322.005	90.0405	561.927	21.2799	78.5833	18.6873	27.3724	8.95015	82.0327	-92.54	562.107	0.063549	0.660408	3.59774	0.556124
51	Northern Acacia-Commiphora bushlands and thickets	1	4	6	6	0.126	0.005	1.25952	24.6872	109.466	586.737	80.8173	685.403	21.1195	71.375	20.3694	23.4726	16.9307	-75.0706	-100.281	685.658	0.09542	0.684889	7.94913	0.548682
52	Northern Congolian Forest-Savanna	0	4	4	3	0.082	0.002	2.04679	24.5631	102.163	1449.14	70.6628	680.739	22.4659	58.6115	69.3664	18.9915	17.8257	-152.964	-113.226	680.76	0.052725	0.772925	3.5498	0.121959
53	Sahelian Acacia savanna	0	0	2	0	0.029	0	-0.229539	27.9951	372.024	260.905	145.61	428.56	10.9716	76.41	30.4436	15.0091	14.3274	159.096	-98.0515	428.608	0.029936	0.759251	1.2554	0.411448
54	Serengeti volcanic grasslands	0	0	0	0	-9999	-9999	-9999	21.7239	146.634	538.194	86.768	1178.51	21.555	80.7771	14.8682	21.8524	19.8151	-9999	-9999	1178.73	0.029403	0.653398	3.67862	0.509751
55	Somali Acacia-Commiphora bushlands and thickets	1	2	2	1	0.07	0.002	0.0337392	25.9162	107.135	413.467	105.873	626.948	21.0364	75.291	21.5131	24.5281	17.4954	-56.3822	-89.3284	627.334	0.076087	0.75188	4.74186	0.390094
56	South Arabian fog woodlands, shrublands, and dune	0	0	0	0	-9999	-9999	-9999	24.9416	337.521	93.3314	63.5178	731.589	13.8898	81.1007	2.94341	13.1787	20.6728	-107.213	-9999	729.642	0.280774	3.9393	6.40234	1.4173
57	Southern Acacia-Commiphora bushlands and thickets	1	4	4	6	0.095	0.002	2.41582	21.4109	131.749	740.341	85.4232	1261.53	19.434	65.5398	12.4632	18.2388	25.2128	-167.461	-109.837	1261.69	0.11083	0.846928	8.09776	0.437397
58	Southern Congolian forest-savanna	0	4	1	0	0.052	0.001	1.04567	24.0882	47.9156	1502.84	59.5971	658.496	15.9198	51.4587	15.9815	8.82033	20.5715	-166.115	-119.115	658.509	0.075504	0.747471	7.69955	0.128759
59	Southwest Arabian montane woodlands and grasslands	0	1	4	0	0.069	0.001	-1.7863	21.8369	363.375	257.124	65.9612	1718.88	21.3829	77.6184	35.4366	22.4282	21.4109	-167.135	-92	1709.23	0.557797	2.45883	11.2893	1.43475
60	St. Helena scrub and woodlands	0	0	0	0	-9999	-9999	-9999	-9999	-9999	-9999	-9999	-9999	29.2011	66.7553	58.6122	38.9386	30.9531	-9999	-9999	-9999	-9999	-9999	-9999	-9999
61	Victoria Basin forest-savanna	1	6	5	7	0.124	0.003	1.60252	21.6382	58.044	1150.51	48.7405	1245.54	23.7456	57.9555	51.2221	18.2607	31.2101	-185.057	-112.385	1246.21	0.092908	0.695867	10.4883	0.327597
62	West Sudanian savanna	0	1	1	0	0.029	0	-0.313887	27.3847	236.593	843.136	119.156	312.011	15.4416	62.3502	81.0857	10.1065	29.3257	110.224	-98.5844	312	0.039442	0.78981	2.57012	0.191973
63	Western Congolian forest-savanna	0	3	2	2	0.068	0.001	0.369735	23.8625	110.032	1478.87	70.7591	582.517	17.3344	52.963	16.0982	10.2856	19.3048	-175.136	-119.935	582.381	0.09647	0.959217	9.28013	0.137689
64	Zambezian Baikiaea woodlands	1	0	1	1	0.043	0	-0.80271	22.1377	329.826	650.915	110.702	1113.24	8.7983	63.159	1.94097	7.31217	13.3667	-173.85	-118.233	1113.22	0.023173	0.730809	2.10303	0.14166
65	Zambezian mopane woodlands	0	0	1	0	0.016	0	-9999	23.1246	335.154	581.666	103.735	620.848	13.7496	65.7256	1.7749	12.8417	19.5712	-141.721	-118.207	621.003	0.052085	1.03492	4.35844	0.318217
66	Zambezian-Limpopo mixed woodlands	0	2	1	0	0.032	0.001	1.87889	22.0258	303.866	735.556	105.389	747.989	14.8888	62.1967	4.04759	12.7044	26.1596	-166.931	-111.374	748.086	0.051958	0.965425	4.22644	0.295175
67	Amsterdam-Saint Paul Islands temperate grasslands	1	0	0	0	0.016	0	-9999	12.3957	218.278	1261.89	16.0363	365.906	-9999	-9999	-9999	-9999	-9999	-9999	-9999	283.819	0.422412	1.84269	41.684	0.299457
68	Tristan Da Cunha-Gough Islands shrub and grasslands	0	1	0	0	0.016	0	-9999	10.9765	215.786	2301.89	10.3357	698.096	33.4997	56.4727	171.938	51.1249	-9999	-22	-10	548.964	0.646996	2.94994	67.9026	0.621932
69	East African halophytics	0	0	1	0	0.016	0	-9999	22.796	161.46	570.695	83.5635	872.118	23.2521	70.0119	20.9678	30.2789	16.6352	-151.929	-121.714	872.705	0.097039	1.19585	11.8996	0.682087
70	Etosha Pan halophytics	0	0	0	0	-9999	-9999	-9999	22.7141	367.723	397.771	116.387	1096.09	14.0333	78.7746	7.59251	15.4902	6.4113	-153.154	-9999	1096.3	0.020318	0.944362	1.1112	0.185133
71	Inner Niger Delta flooded savanna	0	0	0	0	-9999	-9999	-9999	28.2504	355.888	305.322	144.011	269.165	14.2717	72.1497	46.7173	10.9857	29.5772	330	-102.833	269.173	0.024151	1.00104	2.31886	0.400373
72	Lake Chad flooded savanna	0	0	0	0	-9999	-9999	-9999	27.6332	340.433	319.742	155.466	299.542	18.3207	72.5367	58.366	16.124	28.351	304.135	-107.571	299.549	0.033285	1.00795	1.35124	0.311321
73	Makgadikgadi halophytics	0	0	0	0	-9999	-9999	-9999	24.0066	379.283	342.912	101.76	913.074	14.9642	83.7686	16.5694	16.951	6.78457	-117.566	-9999	913.106	0.022404	0.915269	1.56571	0.247849
74	Sudd flooded grasslands	0	0	0	0	-9999	-9999	-9999	27.6635	142.581	843.575	90.0094	412.052	24.2772	65.5294	92.4942	25.6597	21.9197	-48.4374	-96.2723	412.054	0.012211	0.759377	1.73005	0.160693
75	Zambezian coastal flooded savanna	0	0	0	0	-9999	-9999	-9999	24.8949	248.066	1075.03	82.2633	26.3901	20.0544	60.6344	33.5516	20.7102	24.0043	-110.632	-105.411	26.3928	0.016344	0.693094	5.54208	0.340944
76	Zambezian flooded grasslands	0	0	1	0	0.016	0	-9999	21.8528	231.624	962.292	103.193	1034.72	16.4044	60.1767	17.4661	13.1064	16.4256	-180.626	-122.394	1034.82	0.025958	0.8745	2.93544	0.166542
77	Angolan montane forest-grassland	0	0	1	0	0.016	0	-9999	18.6433	137	1385.38	86.7448	1702.24	15.7735	57.1525	15.1191	8.06925	26.2724	-173.375	-120.688	1700.61	0.219006	1.6441	21.4216	0.166709
78	East African montane moorlands	0	5	5	7	0.109	0.003	2.63998	9.20873	88.8781	1451.26	54.9283	3393.41	28.7127	56.6766	120.197	33.099	20.9727	-105.571	-125.714	3384.01	0.523142	1.86109	20.6906	0.928694
79	Ethiopian montane grasslands and woodlands	1	4	4	3	0.119	0.002	-0.247853	17.6153	129.309	1017.39	92.7618	2175.52	29.9361	65.9031	108.05	38.5963	35.0645	-150.087	-94.0979	2171.49	0.383115	2.02828	15.0009	1.34358
80	Ethiopian montane moorlands	0	2	4	0	0.068	0.001	0.498982	10.9215	99.1855	1150.86	92.1289	3304.7	32.2045	60.4075	125.935	48.775	35.9886	-109.956	-95.0682	3285.32	0.465561	1.5409	19.3232	0.551175
81	Highveld grasslands	3	8	5	3	0.149	0.004	1.25439	15.7426	462.066	653.97	70.2639	1499.2	16.7289	64.0759	6.11126	13.8605	29.5847	-175.237	-117.242	1499.02	0.102447	1.4998	4.70819	0.230299
82	Jos Plateau forest-grassland	0	0	0	0	-9999	-9999	-9999	22.9102	181.818	1213.34	103.784	1032.01	18.1739	58.6881	83.9607	11.3891	34.8538	-149.425	-110.25	1031.68	0.142055	0.969	3.01892	0.139221
83	Madagascar ericoid thickets	1	5	4	5	0.116	0.004	1.19467	14.943	225.885	1478.17	96.3899	1943.65	25.0724	53.459	49.9972	23.2619	25.849	-153.2	-84.8	1939.63	0.456849	1.63308	12.343	0.654462
84	Mulanje Montane forest-grassland	0	0	0	0	-9999	-9999	-9999	17.6916	221.637	1561.26	89.3642	1470.53	21.845	55.222	33.5309	17.0388	19.195	-161	-85.3333	1456.35	0.714401	5.9278	29.3926	1.62101
85	Nyanga-Chimanimani Montane forest-grassland	0	1	3	0	0.047	0	0.904206	17.644	277.968	924.913	101.477	1286.32	17.4544	57.4901	14.0005	11.9355	29.8875	-179.833	-101.652	1286.44	0.32121	2.15167	29.8226	0.56189
86	Rwenzori-Virunga montane moorlands	0	2	0	2	0.043	0.001	0.8265	7.88753	37.721	1802.59	32.913	3651.68	35.9564	56.0715	223.116	49.8888	22.7387	-113.5	-107.5	3616.63	0.909951	0.893424	51.7237	0.428156
87	Southern Rift Montane forest-grassland	2	6	4	4	0.108	0.002	3.0563	16.9368	188.909	1208.34	99.8683	1817.33	22.7452	54.3228	25.1076	15.7779	22.3225	-169.477	-118.631	1814.72	0.249209	1.38896	13.0118	0.489138
88	Albany thickets	2	4	5	0	0.116	0.002	-0.446028	17.1981	356.068	502.03	32.24	556.701	17.0176	66.6883	12.7498	15.1459	20.9159	-97.376	-107.391	558.14	0.159416	1.97649	5.59536	0.496768
89	Fynbos shrubland	3	5	3	2	0.114	0.003	1.46298	16.0174	367.114	450.92	39.1709	552.505	15.0597	66.227	26.272	15.0728	20.7474	-103.968	-97.6176	547.385	0.302515	3.29777	8.18825	0.919034
90	Renosterveld shrubland	0	1	2	0	0.043	0.001	-1.01271	16.3441	417.694	395.075	37.3323	568.885	13.4601	69.066	11.187	11.7943	23.1157	-110	-89	569.743	0.154074	2.233	4.99272	0.598522
91	Aldabra Island xeric scrub	0	0	0	0	-9999	-9999	-9999	26.4943	112.892	993.282	79.0515	5	25.1948	60.841	45.5686	26.5308	-9999	-16	-71	4.8646	0.012043	0.373649	8.21271	0.661376
92	Djibouti xeric shrublands	0	2	1	0	0.043	0.001	-0.977391	26.1302	269.813	377.805	66.1394	664.232	20.9572	79.8181	43.0418	26.8759	23.9793	112.164	-84.4234	664.045	0.142457	1.33839	7.66432	0.68214
93	Eritrean coastal desert	0	0	0	0	-9999	-9999	-9999	30.1975	319.167	70.3901	40.7975	92.1985	17.8135	82.0445	12.6228	19.7309	23.0558	330	-9999	91.4946	0.075077	1.22776	2.32071	0.969444
94	Gariep Karoo	0	1	0	0	0.016	0	-9999	19.1421	519.567	171.097	81.9637	1014.43	7.35642	82.9001	0.071161	5.05676	8.63697	-118.342	-9999	1014.51	0.055213	1.02974	1.69444	0.534078
95	Hobyo grasslands and shrublands	0	0	0	0	-9999	-9999	-9999	27.158	98.323	259.578	101.957	60.3632	20.1684	79.6282	5.45983	22.4114	16.9755	-43.9	-103.75	59.2614	0.027402	0.610328	3.20218	0.414802
96	Ile Europa and Bassas da India xeric scrub	0	0	0	0	-9999	-9999	-9999	24.6675	231.528	443.9	105.356	8.3	23.0296	69.2604	86.1657	35.6686	-9999	-9999	-9999	8.6463	0.014517	0.403744	4.05307	0.478198
97	Kalahari xeric savanna	0	1	1	0	0.03	0.001	-0.44915	20.6218	470.858	342.409	92.3463	1168.73	7.02194	73.1332	0.384834	5.90496	8.18505	-143.056	-128.968	1168.72	0.022177	0.722835	1.18868	0.221111
98	Kaokoveld desert	0	0	0	0	-9999	-9999	-9999	21.199	212.086	67.5183	120.442	328.593	8.37959	83.5892	0.672842	11.7048	7.14793	-158.647	-9999	328.029	0.05025	0.878216	1.80043	1.11336
99	Madagascar spiny thickets	0	0	0	0	-9999	-9999	-9999	24.1336	303.981	588.723	92.4776	190.796	16.3501	63.7768	11.2672	14.2773	23.1697	-77.9209	-77.1948	190.303	0.052375	0.984101	5.16172	0.461268
100	Madagascar succulent woodlands	0	0	0	0	-9999	-9999	-9999	24.0584	275.772	768.518	111.939	394.37	14.472	65.1507	6.08225	12.5018	20.223	-91.1389	-84.2914	394.298	0.07227	0.917263	3.92829	0.261822
101	Nama Karoo shrublands	1	2	2	0	0.065	0.001	-1.23332	16.1293	542.022	299.683	52.6289	1170.99	12.4856	75.7512	0.704389	9.21505	11.7031	-120.421	-9999	1171.37	0.07848	1.22729	2.21127	0.325667
102	Namaqualand-Richtersveld steppe	0	1	0	0	0.016	0	-9999	17.9359	327.701	103.376	45.7886	448.171	6.48292	78.8411	0.921851	4.16658	10.0367	-119.158	-9999	448.019	0.091056	1.67553	2.48029	1.28424
103	Namib Desert	0	1	1	0	0.03	0.001	-0.670929	19.2433	248.676	49.235	89.5774	528.175	4.73742	84.3732	0.221468	4.74433	4.49844	-138.427	-9999	528.127	0.068784	1.12087	1.58956	1.42808
104	Namibian savanna woodlands	0	0	0	0	-9999	-9999	-9999	21.1838	253.995	223.391	113.981	815.241	8.88016	80.2071	0.782737	8.55756	10.1562	-156.349	-123.438	814.446	0.132682	1.44818	7.21256	0.889194
105	Socotra Island xeric shrublands	0	1	1	0	0.029	0.001	-0.324985	24.3627	130.725	119.979	63.1118	307.099	20.5685	77.5299	11.7499	24.3491	26.3055	-107.1	-9999	303.649	0.300407	0.964856	8.12177	1.85701
106	Somali montane xeric woodlands	0	0	0	0	-9999	-9999	-9999	24.7789	240.817	102.47	86.0761	580.755	13.5202	79.919	8.10917	14.9552	11.1726	-41.1968	-67	579.547	0.192087	2.06102	4.11111	1.27323
107	Southwest Arabian coastal xeric shrublands	0	0	0	0	-9999	-9999	-9999	28.5135	314.922	68.5638	52.5817	121.752	15.7312	81.3363	15.2319	15.3076	27.7846	280.359	-9999	121.212	0.059775	1.01994	1.92968	1.08773
108	Southwest Arabian Escarpment shrublands and woodlands	0	0	2	0	0.029	0	-0.339097	25.8969	390.649	173.088	54.3835	932.989	17.4148	79.767	12.0764	17.3665	23.7955	4.57667	-82.5	935.35	0.22385	1.33469	5.39943	0.912362
109	Southwest Arabian highland xeric scrub	0	0	1	0	0.016	0	-9999	20.2493	363.756	258.902	76.9144	2116.42	18.6877	81.3423	8.83395	17.1066	20.9831	-168.929	-9999	2115.39	0.232778	1.13047	6.69343	0.528188
110	Succulent Karoo xeric shrublands	1	1	3	0	0.068	0.001	-1.61165	17.2108	466.642	233.353	37.8344	685.261	11.3749	75.9873	1.84961	7.50043	12.0624	-108.649	-186	687.652	0.128647	1.86207	3.26167	0.729055
111	Central African mangroves	0	1	0	0	0.016	0	-9999	26.3697	106.873	2592.88	68.1101	16.3231	23.225	52.4432	71.6973	19.482	27.7273	-62.4944	-78.7159	15.8018	0.027008	0.648228	8.15628	0.157109
112	East African mangroves	0	0	0	0	-9999	-9999	-9999	26.6917	120.376	936.676	86.4377	9.42523	23.2193	64.5176	43.5609	23.6063	28.0905	-30.125	-125.714	10.4087	0.025055	0.727481	18.3726	0.707487
113	Guinean mangroves	0	0	0	0	-9999	-9999	-9999	26.8151	113.071	2386.05	121.674	15.2638	22.0718	53.4717	83.2046	18.6906	33.8721	-58.7353	-46.0299	14.9675	0.029284	0.988563	7.26084	0.187749
114	Madagascar mangroves	0	2	0	1	0.035	0	1.11936	26.1041	168.906	1216.94	125.483	29.7619	18.0196	62.7566	27.2948	18.3971	22.6595	-17.2727	-98	29.5296	0.047251	0.746572	7.82274	0.374666
115	Red Sea mangroves	0	0	0	0	-9999	-9999	-9999	29.0418	332.698	80.2182	63.227	23.3183	16.6392	81.9119	12.0348	18.6073	25.4748	136	-9999	23.2735	0.040502	1.60306	2.29892	1.14043
116	Southern Africa mangroves	0	0	0	0	-9999	-9999	-9999	21.273	254.469	1001.73	43.1022	58.3479	18.2391	60.218	29.0279	17.4871	46.8854	-70	-125	56.876	0.066124	1.28479	6.74177	0.385625
117	Adelie Land tundra	0	0	0	0	-9999	-9999	-9999	-13.5293	615.666	237.011	43.0099	275.66	-9999	-9999	-9999	-9999	-9999	32	-64	268.835	0.16505	1.24268	2.11315	0.654438
118	Central South Antarctic Peninsula tundra	0	0	0	0	-9999	-9999	-9999	-13.0248	533.944	207.341	62.9149	866.624	-9999	-9999	-9999	-9999	-9999	-2.27273	-37.6471	857.611	0.285982	1.58973	2.68602	0.949248
119	Dronning Maud Land tundra	0	0	0	0	-9999	-9999	-9999	-24.2353	733.26	138.056	75.5032	1776.55	-9999	-9999	-9999	-9999	-9999	34	-9999	1772.54	0.342537	1.22618	6.97684	6.11789
120	East Antarctic tundra	0	0	0	0	-9999	-9999	-9999	-19.7818	719.066	230.044	39.8102	365.1	-9999	-9999	-9999	-9999	-9999	12.6364	-9999	294.2	0.102843	1.45528	2.31095	0.842249
121	Ellsworth Land tundra	0	0	0	0	-9999	-9999	-9999	-15.2403	596.259	925.666	42.975	559.192	-9999	-9999	-9999	-9999	-9999	-9999	-21	544.322	0.13944	1.18272	3.30231	0.34367
122	Ellsworth Mountains tundra	0	0	0	0	-9999	-9999	-9999	-29.5182	791.06	327.179	64.2314	1707.6	-9999	-9999	-9999	-9999	-9999	-9999	-9999	1705.15	0.364565	0.958074	4.1917	1.04186
123	Enderby Land tundra	0	0	0	0	-9999	-9999	-9999	-18.113	707.595	357.717	59.3503	681.681	-9999	-9999	-9999	-9999	-9999	31	-154.5	628.188	0.12969	1.86329	9.78729	2.82255
124	Marie Byrd Land tundra	0	0	0	0	-9999	-9999	-9999	-21.3532	730.173	470.791	54.619	1070.49	-9999	-9999	-9999	-9999	-9999	-9999	4.75	1062.9	0.323668	1.11547	3.79594	0.609507
125	North Victoria Land tundra	0	0	0	0	-9999	-9999	-9999	-23.1764	679.285	124.626	63.3239	1483.8	-9999	-9999	-9999	-9999	-9999	-9999	-9999	1463.34	0.430799	5.21289	3.56258	2.30626
126	Northeast Antarctic Peninsula tundra	0	0	0	0	-9999	-9999	-9999	-7.4141	438.317	343.012	42.1624	358.784	-9999	-9999	-9999	-9999	-9999	-31.1429	-84.5	345.264	0.26578	2.45686	7.09013	1.40442
127	Northwest Antarctic Peninsula tundra	0	0	0	0	-9999	-9999	-9999	-7.97869	392.702	488.975	40.5272	583.371	-9999	-9999	-9999	-9999	-9999	-28.2903	-30.25	553.376	0.445316	3.35368	8.89483	0.908238
128	Prince Charles Mountains tundra	0	0	0	0	-9999	-9999	-9999	-24.7778	862.972	201.964	102.252	1033.22	-9999	-9999	-9999	-9999	-9999	-9999	-9999	1027.46	0.069756	0.942485	3.18829	2.04395
129	Scotia Sea Islands tundra	0	0	0	0	-9999	-9999	-9999	-2.70988	297.762	1139.65	20.1496	385.834	32.5403	59.5832	203.649	52.8658	-9999	-30.6875	-22.5676	353.705	0.360141	1.24449	9.31843	0.595995
130	South Antarctic Peninsula tundra	0	0	0	0	-9999	-9999	-9999	-20.1548	706.294	72.7196	84.5755	1144.05	-9999	-9999	-9999	-9999	-9999	-9999	-9999	1134.05	0.181769	1.09421	1.04483	1.00987
131	South Orkney Islands tundra	0	0	0	0	-9999	-9999	-9999	-5.51079	428.619	632.852	29.9479	268.295	-9999	-9999	-9999	-9999	-9999	-26	-23	251.452	0.266234	1.68556	5.4472	0.750851
132	South Victoria Land tundra	0	0	0	0	-9999	-9999	-9999	-24.1909	762.806	90.018	58.519	1181.73	-9999	-9999	-9999	-9999	-9999	-9999	-9999	1174.78	0.408268	3.30184	4.2582	2.97801
133	Southern Indian Ocean Islands tundra	0	0	0	0	-9999	-9999	-9999	3.12503	207.767	943.184	11.3194	293.196	32.0931	57.2	252.028	49.814	-9999	-12.5278	-12.9167	277.227	0.353403	1.97586	15.5972	0.429524
134	Transantarctic Mountains tundra	0	0	0	0	-9999	-9999	-9999	-34.0734	980.865	85.3396	98.1713	1809.24	-9999	-9999	-9999	-9999	-9999	-9999	-9999	1804.1	0.386692	1.70682	2.22893	2.75712
135	Admiralty Islands lowland rain forests	0	4	1	4	0.066	0.001	2.52744	26.6433	12.7693	3642.38	8.22435	112.656	29.6878	51.0381	91.1899	28.1812	24.651	-14	330	110.59	0.130136	0.514864	10.8448	0.141364
136	Banda Sea Islands moist deciduous forests	0	0	1	0	0.016	0	-9999	26.7859	82.3111	1944.53	64.7267	104.595	25.673	52.1098	42.2165	21.0052	22.2797	-25.1053	-71.8947	101.652	0.123031	0.798198	11.6946	0.280603
137	Biak-Numfoor rain forests	0	0	0	1	0.016	0	-9999	25.2227	36.7725	2826.83	12.3365	153.179	28.6435	50.1676	79.1597	25.0838	22.7068	-18.5	14.625	145.714	0.12914	0.942391	9.31384	0.105958
138	Buru rain forests	0	4	2	1	0.057	0.001	2.13015	24.5264	69.5844	1997.06	43.6095	562.761	27.3122	49.4647	69.2669	21.2256	14.5259	-121.25	-86.5357	558.343	0.407161	1.28994	28.0239	1.38584
139	Central Range Papuan montane rain forests	0	9	7	15	0.172	0.006	3.2044	19.803	44.9377	3221.48	18.3467	1413.72	30.9746	51.987	111.77	37.1652	14.7308	-154.385	147.881	1413.85	0.548813	1.16594	53.9088	0.659231
140	Halmahera rain forests	0	4	2	3	0.071	0.001	1.89869	25.5334	31.6658	2120.47	24.3246	285.148	26.8683	48.4009	63.5408	21.8621	16.0286	-66.6585	-83.1463	275.092	0.280963	0.771897	15.9986	0.361208
141	Huon Peninsula montane rain forests	0	4	1	4	0.071	0.002	1.76775	20.703	51.7534	2598.2	36.8313	1205.27	30.7418	55.2076	126.726	32.9195	22.2872	-133.435	69.8913	1205.11	0.600859	1.25921	46.0824	1.44736
142	Lord Howe Island subtropical forests	0	4	0	0	0.033	0.002	2.1795	18.7208	247.266	1619.93	18.1181	109.467	31.2429	55.4	74.6	46.8143	-9999	-66	-59	98.2626	0.262658	1.79602	38.4193	0.141501
143	Louisiade Archipelago rain forests	0	3	1	4	0.059	0.002	2.55437	25.7556	91.6498	2908.42	25.2044	134.76	28.4185	50.2223	47.3486	23.6733	22.1283	1.57143	-0.714286	121.88	0.205967	0.895192	108.975	2.40058
144	New Britain-New Ireland lowland rain forests	0	5	2	9	0.105	0.003	2.04341	25.4671	41.7804	3363.94	32.0933	232.726	28.4832	50.421	78.5282	26.1425	22.7883	-95.8165	273.55	230.916	0.217307	0.8078	33.3596	0.958995
145	New Britain-New Ireland montane rain forests	0	6	1	7	0.097	0.003	2.20199	22.1576	44.2706	3194.1	21.7328	919.026	30.5501	51.1003	118.613	30.4763	19.8509	-146.088	291.176	916.27	0.48119	1.26444	48.3085	1.08512
146	New Caledonia rain forests	0	4	4	6	0.087	0.006	3.60481	21.6729	235.206	1874.22	46.3764	308.821	24.173	52.455	53.7208	22.7429	26.0333	-110.766	-54.6809	302.723	0.351429	1.46053	108.9	3.49354
147	Norfolk Island subtropical forests	0	0	0	0	-9999	-9999	-9999	19.3532	234.766	1301.45	19.2368	94.2857	25.3426	58.8454	44.5501	35.688	-9999	-9999	-9999	90.5012	0.202009	6.02859	31.2593	1.14301
148	Northern New Guinea lowland rain and freshwater swamp forests	0	5	3	9	0.113	0.003	2.37166	26.2618	28.6844	2753.13	24.9413	147.092	26.8681	48.8392	67.39	25.4061	13.7866	-57.7139	12.0636	147.277	0.096632	0.583702	10.3198	0.244019
149	Northern New Guinea montane rain forests	0	4	0	6	0.072	0.002	2.39984	24.6162	27.2327	2744.95	21.3356	522.243	26.8722	49.7876	74.5869	22.3213	7.45301	-161.667	74.746	521.263	0.302765	0.745618	16.0426	0.321068
150	Queensland tropical rain forests	0	8	3	6	0.097	0.004	3.36195	22.0586	316.839	1889.98	83.416	319.842	20.2801	55.9688	37.4114	16.6167	18.9364	-131.946	-59.8125	318.459	0.212528	1.25386	133.824	4.79587
151	Seram rain forests	0	8	3	13	0.129	0.004	3.45257	25.1251	68.3126	2904.18	43.2192	348.231	26.3745	48.8965	67.2843	20.0134	17.1766	-90.8246	-71.7368	339.697	0.29242	1.04141	23.0893	0.961098
152	Solomon Islands rain forests	0	8	2	9	0.099	0.003	3.82903	25.4702	44.6885	3251.86	19.2634	298.168	29.3786	50.717	70.5049	28.498	21.3612	-43.2566	187.929	286.76	0.276363	1.07533	27.1928	0.615814
153	Southeast Papuan rain forests	0	10	6	15	0.147	0.005	4.24057	22.6845	79.6101	2521.06	29.5092	788.616	28.0581	51.6301	85.2719	26.7496	16.6477	-125.552	-12.0478	784.023	0.402096	1.21862	50.8091	1.66532
154	Southern New Guinea freshwater swamp forests	0	3	1	3	0.06	0.001	1.54804	26.7334	83.5247	3030.89	33.3549	27.8373	27.5579	49.1782	81.0763	27.2338	8.97768	-39.3944	118.722	27.8069	0.021135	0.563762	11.6253	0.326664
155	Southern New Guinea lowland rain forests	0	5	1	3	0.078	0.002	1.06955	26.425	83.5312	3673.59	23.4316	84.3681	26.1802	49.1801	84.7596	22.9438	6.19623	-68.1335	222.856	84.3814	0.046724	0.581547	13.2242	0.26987
156	Sulawesi lowland rain forests	0	6	3	6	0.081	0.002	3.95575	26.1075	43.2681	2094.73	33.4494	227.191	26.0606	50.6207	47.7404	20.5641	26.3282	-73.3841	-70.8811	223.166	0.24794	0.871978	19.5177	0.4305
157	Sulawesi montane rain forests	0	8	4	9	0.11	0.003	3.72433	21.7687	34.6865	2277.23	33.2378	1005.13	28.2521	49.602	81.856	25.2896	17.5432	-165.414	-18.0864	1003.92	0.526318	1.06257	25.597	0.98877
158	Trobriand Islands rain forests	0	6	2	4	0.073	0.002	3.1777	25.0457	79.4126	3300.25	19.9612	299.208	28.6669	50.0668	86.8804	25.6251	25.3876	-79.2143	174.214	280.604	0.350005	1.24659	68.2348	1.79476
159	Vanuatu rain forests	0	4	3	10	0.096	0.004	3.5996	24.1818	121.268	3009.31	30.9095	298.718	29.2105	52.6511	52.6849	29.668	26.3412	-78.025	56	280.569	0.28602	1.52004	95.691	1.9494
160	Vogelkop montane rain forests	0	5	1	4	0.068	0.002	3.17019	21.554	32.3691	3081.14	17.3984	1011.47	29.4475	50.5175	107.42	29.314	6.17335	-163.397	101.857	998.128	0.482126	0.895587	22.2766	0.517185
161	Vogelkop-Aru lowland rain forests	0	4	1	2	0.045	0.001	3.03006	26.0784	53.0652	2972.77	23.3612	212.164	25.9433	48.9975	70.235	21.2513	8.01522	-90.724	102.62	207.003	0.174336	0.723143	10.7349	0.243941
162	Yapen rain forests	0	2	1	2	0.042	0.001	3.1466	25.1106	22.1607	3143.45	9.87132	323.995	29.177	50.2755	89.4074	27.684	17.2098	-129.167	264.667	318.008	0.373961	0.714502	20.0327	0.136396
163	Lesser Sundas deciduous forests	0	2	1	2	0.04	0.001	3.75325	24.8673	68.9857	1594.63	80.01	414.779	25.8974	55.269	37.3947	27.6384	26.1048	-85.7545	-82.1364	405.945	0.389419	0.984229	60.9713	0.652653
164	New Caledonia dry forests	0	3	2	0	0.051	0.001	1.50059	23.1823	235.897	1518.65	52.9259	72.1105	21.1169	56.0621	40.0552	21.2465	32.2075	-85.9333	-75.5333	71.3726	0.148928	1.15598	61.4022	3.96802
165	Sumba deciduous forests	0	0	0	0	-9999	-9999	-9999	25.3592	87.3538	1584.36	79.9606	330.899	20.8646	56.8804	24.2782	17.952	23.5554	-75.9333	-80.2667	329.154	0.193741	0.898076	44.0448	0.452565
166	Timor and Wetar deciduous forests	0	3	1	2	0.047	0	2.7896	24.6206	107.116	1478.5	81.1579	424.721	21.7357	57.2158	29.91	20.0109	22.8241	-82.2353	-94.8627	417.954	0.297137	1.36891	37.7817	0.831463
167	Chatham Island temperate forests	0	4	2	0	0.042	0.001	2.69063	11.2091	274.673	1046.84	19.9742	89.9464	29.5193	58.5687	153.032	49.8772	6.33146	3.25	29.5	79.0481	0.07556	1.02015	20.1464	0.948264
168	Eastern Australian temperate forests	0	7	7	5	0.111	0.005	4.17955	15.6024	447.325	988.877	33.7887	502.745	19.9362	58.5727	31.225	24.2055	20.3632	-123.612	-96.8796	502.165	0.175058	1.53136	18.9598	0.728795
169	Fiordland temperate forests	0	3	3	0	0.053	0.001	1.47946	7.98665	331.436	2367.99	24.8947	685.746	36.8558	51.6807	259.701	56.9953	3.97788	-57.6522	97.2174	671.503	0.677194	3.75721	166.662	3.05005
170	Nelson Coast temperate forests	0	6	5	1	0.068	0.002	3.73719	9.61493	360.948	2855.05	23.6187	550.093	31.5256	51.0533	169.261	42.6981	12.7474	-52.4231	0.211538	547.698	0.391695	2.20419	163.447	2.50749
171	New Zealand North Island temperate forests	0	7	6	1	0.083	0.002	3.25332	11.7288	360.1	1534.82	20.9507	386.148	28.4919	52.9896	97.7927	33.99	23.1168	-37.1456	-36.5633	382.516	0.182665	1.29822	56.2371	2.30958
172	New Zealand South Island temperate forests	0	3	3	0	0.053	0.001	1.47946	9.67241	329.759	1222.05	19.4361	216.997	30.5181	54.8851	136.75	37.7854	25.6507	-46.2553	-47.383	213.691	0.141826	1.4761	45.9446	2.07526
173	Northland temperate kauri forests	0	7	6	2	0.101	0.003	1.59623	14.2067	320.185	1520.22	21.6382	121.297	27.0212	53.4466	78.9698	29.8973	34.8839	-40.3482	-36.4286	118.344	0.122277	1.02275	46.3494	2.00056
174	Rakiura Island temperate forests	0	5	3	0	0.042	0.001	5.11659	9.43677	245.05	1450.75	17.842	182.248	32.8217	47.439	216.739	45.7232	0	-45.1429	-55	168.787	0.193183	1.98504	38.0503	1.28492
175	Richmond temperate forests	0	6	6	1	0.083	0.002	2.91455	10.1684	380.6	1521.89	21.1909	520.555	26.8633	54.129	107.078	37.5806	14.6578	-50.2857	-43.7021	503.725	0.367578	2.18518	104.506	2.61064
176	Southeast Australia temperate forests	1	5	6	1	0.102	0.003	1.93994	14.5326	481.545	697.798	21.3624	284.813	18.3544	60.3827	29.5985	23.1904	25.2134	-96.8902	-98.9932	284.744	0.092428	1.37891	10.2512	0.312687
177	Tasmanian Central Highland forests	0	2	3	1	0.06	0.001	1.22413	8.87741	347.883	1269.95	23.9915	657.929	25.6872	54.474	131.324	36.9998	16.8505	-85.9318	-58.8387	657.177	0.215226	1.40563	26.6988	0.401699
178	Tasmanian temperate forests	0	3	3	1	0.064	0.001	1.20214	11.3209	327.775	809.058	19.9922	280.63	21.6196	55.6796	69.1932	32.5211	17.1166	-74.6768	-83.1471	278.677	0.189247	1.72943	22.6053	0.341915
179	Tasmanian temperate rain forests	0	3	3	1	0.064	0.001	1.20214	10.2962	297.23	1684.12	27.3026	325.046	29.4832	51.2261	138.927	42.4741	12.5141	-77.1439	-65.3077	324.332	0.228914	1.20511	34.1122	0.231685
180	Westland temperate forests	0	2	2	0	0.039	0.001	1.44133	9.85344	351.246	3406.99	30.9419	419.537	34.3106	51.1597	223.005	48.844	9.09608	-52.8095	293.238	418.214	0.436719	3.5634	222.085	3.99705
181	Arnhem Land tropical savanna	0	1	1	0	0.021	0	2.79742	27.0741	218.681	1307.53	109.769	102.92	14.4208	59.4588	15.5274	12.3326	5.44338	-22.9362	-102.647	102.676	0.042033	1.0297	4.49287	0.157345
182	Brigalow tropical savanna	0	4	4	3	0.079	0.002	3.12873	20.5024	494.315	655.732	51.0527	310.969	19.7371	66.6878	9.47409	17.6147	10.1442	-106.015	-112.323	310.993	0.060693	1.12216	12.3398	1.54548
183	Cape York Peninsula tropical savanna	0	5	0	2	0.049	0.003	3.25896	26.0744	196.698	1417.54	116.73	98.0943	13.6234	58.2232	16.8918	12.8536	6.97991	-31.5273	-99.3552	98.0199	0.044011	0.785072	19.1834	0.942379
184	Carpentaria tropical savanna	0	0	0	0	-9999	-9999	-9999	26.461	362.332	773.384	116.097	131.225	16.0874	67.9199	7.83724	16.9845	4.20557	-14.992	-105.847	131.183	0.027541	0.896106	3.52431	0.352562
185	Einasleigh upland savanna	0	3	1	2	0.041	0.001	3.7686	23.285	347.53	805.163	103.4	485.213	16.2818	64.5418	4.5248	13.6584	5.92982	-142.882	-105.242	485.205	0.077777	0.912615	21.1609	1.93864
186	Kimberly tropical savanna	0	0	0	0	-9999	-9999	-9999	27.1656	325.905	851.174	119.209	208.572	15.3384	66.3482	7.05208	15.6035	4.71988	53.7661	-105.498	207.332	0.065228	1.26928	4.04421	0.260458
187	Mitchell Grass Downs	0	1	0	0	0.016	0.002	-9999	24.3798	517.974	436.907	86.4845	250.825	18.2013	74.2404	1.39804	17.7357	4.92951	-70.7536	-122.65	250.864	0.023568	0.831501	3.94506	0.818069
188	Trans Fly savanna and grasslands	0	1	0	0	0.016	0	-9999	26.8294	94.7969	1713.85	63.8866	22.6806	24.5259	52.0138	48.6311	20.9526	15.9351	-5.46753	-94.0909	22.5832	0.019448	0.588824	7.96123	0.404674
189	Victoria Plains tropical savanna	0	0	0	0	-9999	-9999	-9999	26.7628	408.962	645.64	114.881	250.048	17.8211	69.7903	5.55331	19.7655	2.29703	16.632	-113.673	250.057	0.032286	1.10207	1.96739	0.186218
190	Canterbury-Otago tussock grasslands	0	5	6	2	0.095	0.002	2.21126	9.3216	416.22	982.526	24.0568	466.929	24.6671	60.2396	73.9612	31.6239	24.6826	-50.6532	-65.5304	461.889	0.194068	2.13116	62.3088	3.48677
191	Eastern Australia mulga shrublands	0	0	0	1	0.016	0	-9999	21.177	621.589	370.587	39.5487	206.053	15.3743	70.7473	2.28263	11.3155	4.29083	-83.7449	-138.519	205.998	0.020946	0.761714	3.27985	0.760181
192	Southeast Australia temperate savanna	0	0	2	1	0.031	0.001	2.33247	18.2028	590.62	419.756	21.4997	147.02	18.1329	70.2443	10.8849	13.6891	16.2584	-89.7354	-130.721	147.079	0.020466	0.926799	2.00816	0.309912
193	Australian Alps montane grasslands	0	0	3	1	0.055	0.001	-1.13938	8.32237	483.674	1275.15	22.2082	1292.98	24.9863	53.5513	104.348	37.281	12.658	-150.591	-96.3902	1278.75	0.35955	1.65093	53.2701	0.514548
194	New Zealand South Island montane grasslands	0	3	6	0	0.074	0.002	2.50915	6.51956	439.162	2550.1	31.771	1080.39	30.6844	55.0255	181.056	43.8768	10.557	-68.5776	11.0258	1079.86	0.646775	3.84423	256.03	5.15974
195	Papuan Central Range sub-alpine grasslands	0	4	2	7	0.1	0.003	1.82774	11.1841	38.0979	3386.94	16.7407	3090.16	36.082	53.6515	205.558	56.8787	12.7581	-67.5652	117.13	3084.81	0.686247	1.45669	51.9622	0.395082
196	Antipodes Subantarctic Islands tundra	0	3	0	0	0.021	0	3.64688	6.67446	180.893	1438.01	12.2136	213.669	35.3832	54.7098	262.751	53.6201	-9999	-36.6667	-20.3333	186.846	0.278715	2.12699	21.1844	0.349818
197	Coolgardie woodlands	0	0	0	1	0.016	0	-9999	17.7961	522.141	276.232	28.5633	344.707	12.0804	70.9632	15.0728	9.86441	6.31727	-95.1659	-96	344.712	0.031274	0.965376	1.33668	0.344766
198	Esperance mallee	0	0	3	1	0.054	0.001	-0.913089	16.3257	415.19	386.766	33.5924	235.99	12.3754	68.9346	19.2966	13.3015	12.4974	-100.031	-119.538	235.892	0.033441	1.34996	2.40776	0.34566
199	Eyre and York mallee	0	0	2	1	0.041	0.001	-0.51404	16.9467	427.806	363.734	44.0906	94.2858	12.2575	73.6129	14.2636	11.0911	22.3037	-96.3175	-91.2	94.2894	0.038426	1.40386	3.22308	0.366194
200	Flinders-Lofty montane woodlands	0	0	2	1	0.031	0.001	2.33247	17.1748	563.013	321.452	25.3483	351.776	12.6925	73.6947	4.04633	8.90956	13.4591	-101.961	-108.333	351.679	0.080819	0.997232	5.87745	0.538076
201	Hampton mallee and woodlands	0	0	1	1	0.03	0	-0.690581	17.7415	370.746	259.352	23.8391	48.4106	14.9194	73.7644	20.4234	15.9218	9.46791	-107.211	-9999	48.5044	0.027594	1.48116	1.30936	0.343877
202	Jarrah-Karri forest and shrublands	0	0	3	0	0.041	0.001	-0.489535	15.3636	313.1	1096.37	68.725	115.631	14.4297	55.1461	70.3351	20.6705	16.7922	-93.0645	-75.3103	115.291	0.064834	1.6175	8.56688	0.218556
203	Murray-Darling woodlands and mallee	0	0	3	1	0.044	0.001	1.44376	16.9885	521.961	343.324	23.6159	93.8298	13.6928	71.6179	10.5025	11.9691	16.6201	-88.5245	-102.4	93.6521	0.023198	0.865365	2.30494	0.303093
204	Naracoorte woodlands	0	0	4	1	0.056	0.001	1.00695	14.7577	362.525	613.657	46.4154	42.6893	15.5265	65.2472	43.4119	22.1312	21.5509	-85.8046	-94.8929	42.6862	0.026405	1.52911	2.88481	0.226717
205	Southwest Australia savanna	0	0	0	1	0.016	0	-9999	19.1986	546.741	342.124	58.2903	287.667	10.0626	70.0757	5.57374	5.68378	15.9449	-92.6391	-94.1818	287.666	0.036971	1.01223	2.17489	0.396897
206	Southwest Australia woodlands	0	0	2	1	0.043	0.001	-0.91041	16.5658	423.46	717.528	72.271	204.092	11.6708	61.704	50.8283	11.7894	21.5735	-99.4585	-97.7672	203.6	0.060773	1.6481	6.36494	0.296142
207	Carnarvon xeric shrublands	0	0	0	0	-9999	-9999	-9999	24.2223	524.029	250.091	74.3563	97.447	8.23914	74.3052	4.93541	6.04139	8.53644	-56.0075	-9999	97.3824	0.023973	1.0374	1.10493	0.350047
208	Central Ranges xeric scrub	0	0	1	1	0.017	0	4.15146	21.8663	619.776	301.501	54.4223	554.467	10.7837	71.2062	1.13321	9.5404	4.51635	-102.506	-9999	554.453	0.039422	0.954033	1.49508	0.370138
209	Gibson desert	0	0	0	0	-9999	-9999	-9999	24.0899	621.462	265.409	60.4171	425.373	12.0936	71.2616	3.21612	11.8125	1.09081	-63.314	-9999	425.372	0.021905	0.832769	0.819627	0.263053
210	Great Sandy-Tanami desert	0	0	1	1	0.017	0	4.15146	25.4067	555.3	361.624	91.4713	366.493	12.4739	71.3187	0.606425	13.2294	1.0574	-43.7904	-118.982	366.495	0.020165	0.89741	0.955854	0.253679
211	Great Victoria desert	0	0	1	1	0.017	0	4.15146	20.1425	577.191	217.721	33.3606	354.693	9.39574	70.7846	1.86293	6.28319	2.25222	-98.9081	-9999	354.697	0.02291	0.783141	0.948847	0.307524
212	Nullarbor Plains xeric shrublands	0	0	0	1	0.016	0	-9999	18.7373	464.909	198.519	24.0067	163.442	11.9384	74.4082	1.96078	8.24939	5.6289	-101.411	-9999	163.445	0.012482	0.683913	0.812022	0.335711
213	Pilbara shrublands	0	0	0	1	0.016	0	-9999	25.8605	534.248	338.543	92.0022	338.466	14.6181	72.4329	4.56691	15.3873	7.9203	-29.5435	-99	338.289	0.052993	1.14699	1.67942	0.355121
214	Simpson desert	0	0	0	2	0.03	0	-0.642953	22.6928	642.166	200.727	48.935	115.274	12.3524	78.0908	0.993015	11.1841	1.83715	-81.5419	-9999	115.273	0.018513	0.798975	1.57092	0.677668
215	Tirari-Sturt stony desert	0	0	1	1	0.017	0	4.15146	20.0117	593.18	190.916	26.8646	142.251	10.3917	76.7675	0.687768	5.51206	5.92797	-87.9875	-9999	142.256	0.028152	0.902521	1.55176	0.511589
216	Western Australian Mulga shrublands	0	0	0	1	0.016	0	-9999	22.0587	634.932	247.695	53.8233	449.491	10.6177	71.9315	3.30761	7.65739	5.91348	-74.9411	-9999	449.498	0.027759	0.879699	1.02786	0.326397
217	New Guinea mangroves	0	2	0	0	0.024	0	1.87725	26.6793	70.7528	3161.08	26.7451	19.9093	30.1194	49.7398	97.6239	30.4085	10.8086	-20.9873	139.443	19.7408	0.026592	0.591615	12.6482	0.333791
218	Andaman Islands rain forests	0	0	0	0	-9999	-9999	-9999	26.6187	79.7175	2810.44	76.5388	66.0192	25.7719	54.6503	58.8649	23.5896	28.4684	-69.1176	-42.2941	63.1128	0.096086	0.835905	20.3114	0.126961
219	Borneo lowland rain forests	0	8	4	7	0.107	0.003	3.51211	26.2837	32.6171	3029.21	22.6727	200.159	26.0089	46.8485	74.4332	17.9312	16.1239	-76.5428	89.731	199.932	0.165529	0.965273	10.5293	0.212127
220	Borneo montane rain forests	0	9	2	5	0.099	0.003	2.77366	23.2574	26.9931	3437.69	16.4846	793.73	26.7623	47.9541	68.1624	18.1789	8.36558	-174.519	108.553	793.598	0.407044	1.62366	24.0302	0.227902
221	Borneo peat swamp forests	0	4	0	0	0.043	0	1.91271	27.0661	34.2951	2995.28	26.6155	25.9903	30.2944	47.6973	171.135	21.3466	20.3635	-34.117	84.2394	25.9072	0.030901	0.599471	6.30905	0.144118
222	Brahmaputra Valley semi-evergreen forests	0	0	0	0	-9999	-9999	-9999	23.7928	420.784	2470.52	88.0892	114.313	23.3179	59.8718	104.683	18.0793	38.5875	-141.454	-31.6216	114.542	0.041605	1.17725	11.9944	0.14201
223	Cardamom Mountains rain forests	0	2	3	0	0.058	0.001	0.626197	26.2097	113.974	2217.42	78.7764	254.406	22.2455	53.692	51.6381	17.1485	22.617	-93.2441	20.6693	253.645	0.185006	1.07356	22.8805	0.384698
224	Chao Phraya freshwater swamp forests	0	0	0	0	-9999	-9999	-9999	27.9435	162.308	1100.96	84.4487	20.7119	27.4035	58.8656	78.5524	24.7739	46.9163	261.333	-111.05	20.7729	0.01962	0.815882	3.95383	0.170224
225	Chao Phraya lowland moist deciduous forests	0	2	0	1	0.035	0	1.2138	27.3442	128.773	1383.21	79.198	117.576	21.906	57.3897	63.2977	16.2382	37.7895	-60.6129	-105.758	117.138	0.08645	0.917233	8.23586	0.255983
226	Chin Hills-Arakan Yoma montane forests	0	0	0	0	-9999	-9999	-9999	19.2698	300.597	2118.65	95.4618	1201.67	27.7717	55.4173	81.9609	26.8304	17.4178	-171.532	-79.8936	1200.78	0.648792	5.86672	74.8759	0.627444
227	Christmas and Cocos Islands tropical forests	0	0	0	0	-9999	-9999	-9999	24.1029	55.4536	2020.5	54.478	161.37	28.0595	54.8027	55.0486	23.7878	56.5897	-9999	-9999	130.019	0.199131	0.631417	49.971	1.35907
228	East Deccan moist deciduous forests	0	0	0	0	-9999	-9999	-9999	25.7598	419.093	1318.26	122.24	403.911	25.6949	64.9413	103.883	25.6688	33.1769	-111.671	-102.884	403.742	0.115128	1.53689	8.8042	0.283841
229	Eastern Java-Bali montane rain forests	0	3	0	1	0.039	0	1.84068	21.5456	53.9771	2485.21	64.4319	800.237	28.0332	54.8201	51.1725	26.8682	28.4971	-134.065	-68.8043	798.345	0.464675	0.948626	92.551	1.1555
230	Eastern Java-Bali rain forests	0	2	0	1	0.033	0	1.77846	26.0504	55.0311	1901.69	69.0219	132.969	25.4001	56.1772	31.1793	19.9974	40.8711	-33.7952	-78.4277	132.602	0.122569	0.804256	30.2028	0.576646
231	Greater Negros-Panay rain forests	0	1	1	7	0.074	0.002	1.51061	26.556	79.5781	2367.39	51.4255	226.641	24.8566	57.3223	57.5126	23.1454	38.8332	-64.2212	-71.6538	223.803	0.198917	1.04943	29.2358	0.479695
232	Hainan Island monsoon rain forests	1	10	8	4	0.146	0.006	2.59368	23.3772	355.657	1568.95	75.806	320.918	22.9772	54.5653	44.3429	17.7611	27.3116	-191.149	-80.8723	320.775	0.234548	1.70919	13.0709	0.134694
233	Himalayan subtropical broadleaf forests	0	0	1	0	0.016	0	-9999	22.1462	504.097	1814.56	114.606	577.037	24.3053	60.2045	96.0783	20.4496	31.2875	-175.766	-68.7734	592.367	0.404618	3.46672	48.2538	1.15053
234	Irrawaddy freshwater swamp forests	0	0	0	0	-9999	-9999	-9999	27.0266	186.833	2416.94	106.595	6.4169	27.8601	55.8869	90.4695	23.0754	35.7168	-89.1277	-83.4681	6.41499	0.013285	0.936776	8.23	0.102237
235	Irrawaddy moist deciduous forests	0	0	0	0	-9999	-9999	-9999	25.5986	326.89	1421.55	91.7406	218.29	24.724	60.1436	104.339	22.3455	26.9098	-131.911	-85.3217	218.506	0.107377	1.42802	11.5346	0.193518
236	Jian Nan subtropical evergreen forests	3	14	14	7	0.222	0.013	3.24091	17.852	714.619	1565.56	58.8682	414.72	24.4349	58.1904	103.411	16.4639	29.1011	-173.975	-87.9406	414.238	0.258297	2.89617	14.7648	0.211603
237	Kayah-Karen montane rain forests	0	6	7	2	0.115	0.004	1.66839	23.6459	238.612	1415.21	86.0897	722.104	25.5236	56.9342	68.3699	23.4342	19.2268	-178.478	-102.135	721.951	0.326206	2.60297	20.5411	0.417817
238	Lower Gangetic Plains moist deciduous forests	0	0	0	0	-9999	-9999	-9999	25.3959	449.221	1773.09	106.269	46.0246	24.0784	63.8649	88.0878	17.4298	41.1251	-135.834	-59.8288	45.9849	0.019233	0.824601	7.51426	0.10781
239	Luang Prabang montane rain forests	0	4	8	1	0.094	0.001	2.31195	22.9776	270.923	1551.76	91.7632	754.677	24.8749	56.5458	59.5334	23.2709	24.7982	-173.896	-98.457	754.361	0.288979	2.67045	41.4545	0.50731
240	Luzon montane rain forests	0	3	0	1	0.047	0	0.736924	22.2579	145.577	2783.01	55.8583	879.808	27.472	53.6994	63.8759	26.8031	21.6741	-173.63	-40.8148	875.122	0.555617	2.9244	55.638	1.20186
241	Luzon rain forests	0	8	4	7	0.111	0.003	3.25588	25.9847	135.369	2436.49	69.1297	224.325	26.4769	57.1307	64.0932	25.2479	35.0951	-86.3025	-29.5943	223.391	0.218728	1.37462	34.3348	0.843824
242	Malabar Coast moist forests	0	0	0	0	-9999	-9999	-9999	27.1141	135.844	3089.77	117.743	58.3033	25.7636	59.3848	75.6782	26.5475	42.8197	-62.3148	127.602	57.4123	0.086352	0.94106	53.9286	0.464616
243	Maldives-Lakshadweep-Chagos Archipelago tropical moist forests	0	0	0	0	-9999	-9999	-9999	26.7627	88.807	2264.44	87.8411	93.3615	25.9103	56.2298	75.9969	25.2607	23.9137	-65	-248	71.6055	0.165127	1.06186	22.9283	0.20736
244	Meghalaya subtropical forests	0	0	0	0	-9999	-9999	-9999	21.9913	399.536	3083.97	94.4831	510.59	24.8588	54.8501	87.2691	22.701	20.464	-164.457	37.2681	510.516	0.200129	2.24475	113.902	0.703566
245	Mentawai Islands rain forests	0	0	0	0	-9999	-9999	-9999	25.6384	32.1726	3478.09	24.7804	82.5787	28.3696	49.5275	79.1868	23.2144	15.5448	-29.1667	201	80.6417	0.098106	0.591965	6.3486	0.096531
246	Mindanao montane rain forests	0	6	2	5	0.078	0.002	3.0859	22.6553	63.6747	2689.72	28.4836	1057.08	26.9946	51.7213	78.196	22.9374	24.9487	-172.442	-76.1923	1054.02	0.444252	1.45774	39.8464	0.930505
247	Mindanao-Eastern Visayas rain forests	0	5	3	5	0.089	0.002	2.46829	26.2752	66.4422	2664.39	36.3095	237.493	25.3432	53.3706	51.4435	21.4206	32.6524	-69.7285	-28.4007	236.364	0.174987	0.956838	22.3513	0.490321
248	Mindoro rain forests	0	2	0	0	0.024	0	1.87776	25.578	82.155	2646.92	70.0023	386.061	26.5538	57.3144	63.1863	26.2136	30.3188	-105.828	-80.0345	382.201	0.369992	1.76984	28.1051	0.528547
249	Mizoram-Manipur-Kachin rain forests	0	0	0	0	-9999	-9999	-9999	22.3917	366.151	2362.67	96.0507	527.632	26.4282	54.8477	89.3027	25.2051	19.8137	-172.094	-11.4518	527.606	0.330394	3.34682	39.1831	0.486352
250	Myanmar coastal rain forests	0	0	0	0	-9999	-9999	-9999	26.3022	203.55	3650.34	113.528	81.4896	26.5217	55.8078	82.8357	24.3081	30.2797	-96.2626	166.152	80.8626	0.104475	1.21006	29.7357	0.270699
251	Nansei Islands subtropical evergreen forests	3	7	4	2	0.131	0.005	1.41935	20.7373	504.298	2463.68	30.5301	193.859	28.3019	52.46	111.038	29.7495	47.1723	-117.357	32.9286	180.273	0.23124	1.9159	24.9149	0.269262
252	Nicobar Islands rain forests	0	0	0	0	-9999	-9999	-9999	26.7786	49.0024	2625.36	41.2739	89.6109	26.7217	52.6025	80.561	22.3452	21.1623	-51.25	-73	82.4479	0.104796	0.720763	25.3023	0.121346
253	North Western Ghats moist deciduous forests	0	0	0	0	-9999	-9999	-9999	25.3126	220.901	2455.38	141.559	410.776	28.1406	63.0568	97.9565	33.5262	33.1777	-119.631	17.9857	410.85	0.156347	1.38052	62.313	0.830203
254	North Western Ghats montane rain forests	0	0	0	0	-9999	-9999	-9999	24.1974	173.788	3483.66	149.405	549.186	27.3588	56.1712	73.1202	27.758	28.8599	-145.768	68.4316	549.026	0.228716	1.45361	101.321	0.941527
255	Northern Annamites rain forests	1	7	7	2	0.145	0.005	0.358991	23.1648	307.222	2207.61	95.5593	474.377	24.6607	55.8017	50.0342	22.7304	24.767	-174.936	-86.6454	474.324	0.256995	3.34924	35.3315	0.646884
256	Northern Indochina subtropical forests	2	15	17	10	0.246	0.021	2.62701	20.0698	371.394	1490	87.384	1106.52	26.2271	56.9	74.728	23.3943	24.7275	-172.927	-100.264	1106.47	0.370034	2.84558	16.4368	0.4848
257	Northern Khorat Plateau moist deciduous forests	0	0	0	0	-9999	-9999	-9999	25.4713	286.807	2056.95	98.2185	203.156	21.1405	56.1985	67.978	13.1221	37.6715	-141.808	-89.2692	203.193	0.055519	1.16045	10.6353	0.167128
258	Northern Thailand-Laos moist deciduous forests	0	1	1	0	0.03	0	-0.418035	24.7129	257.485	1225.93	86.6009	492.253	24.3047	58.5386	68.2865	21.5857	24.9232	-150.669	-113.032	492.505	0.223145	1.75857	12.3529	0.429924
259	Northern Triangle subtropical forests	0	1	0	0	0.016	0	-9999	19.431	437.575	2738.72	97.2451	909.685	27.4041	52.3807	96.8284	31.8713	10.1984	-175.847	172.328	909.928	0.416869	1.3742	51.7322	1.11606
260	Northern Vietnam lowland rain forests	0	2	2	0	0.049	0.001	0.249146	24.342	395.69	1951.15	85.4539	87.8777	25.1365	58.564	62.1537	21.8528	39.5704	-143.901	-87.4789	87.9097	0.115638	1.96264	12.1603	0.649419
261	Orissa semi-evergreen forests	0	0	0	0	-9999	-9999	-9999	26.7774	331.745	1489.6	96.9066	40.474	23.9071	65.3722	103.995	17.4149	41.7993	-127.088	-95.6029	40.2936	0.047799	1.05536	8.92296	0.127638
262	Palawan rain forests	0	2	1	0	0.037	0	0.497677	26.4374	61.4456	1992.6	66.9001	185.522	25.1149	55.2226	55.4368	21.1704	24.8687	-51.1395	-87.2326	182.348	0.251039	1.07862	17.2418	0.337296
263	Peninsular Malaysian montane rain forests	0	7	3	3	0.087	0.002	2.55644	22.673	59.1962	2817.42	34.7318	798.168	25.3484	48.5546	58.5318	17.7558	16.5051	-167.189	-74.8302	796.258	0.538237	1.52268	52.2275	0.633591
264	Peninsular Malaysian peat swamp forests	0	0	0	0	-9999	-9999	-9999	26.6711	54.9934	2642.65	48.3116	21.7614	24.6894	49.1982	108.626	17.5136	27.277	-38.25	-97.0833	21.7876	0.022787	0.59442	9.31006	0.302861
265	Peninsular Malaysian rain forests	0	7	5	4	0.111	0.003	1.95892	26.2091	57.7941	2469.22	38.3031	134.959	23.8255	49.7961	70.456	14.0378	30.0692	-59.9972	-88.3508	134.54	0.149402	0.879531	18.3227	0.373475
266	Red River freshwater swamp forests	0	1	2	0	0.043	0.001	-0.636355	23.6318	470.03	1678.03	84.0795	13.0337	24.7817	60.6487	61.202	19.5859	47.3397	-185.824	-86.8824	13.1244	0.023018	0.680052	6.32933	0.233957
267	South China Sea Islands	0	0	0	0	-9999	-9999	-9999	26.7482	210.832	1498.14	83.4198	3.57143	35.549	64.8431	103.059	61.3137	-9999	-9999	-9999	3.50926	0.042879	1.04775	4.39992	0.11293
268	South China-Vietnam subtropical evergreen forests	2	12	16	6	0.216	0.012	2.89556	21.9667	530.799	1658.05	75.1527	195.675	23.5313	59.0624	82.7085	16.7888	34.1106	-187.636	-87.6162	194.796	0.132903	1.33417	9.21009	0.20913
269	South Taiwan monsoon rain forests	1	9	7	3	0.145	0.007	1.76771	22.7965	322.539	3003.81	102.925	338.522	25.9002	55.8936	58.733	25.4049	47.5666	-151.625	-59.25	327.097	0.357882	3.61441	140.396	0.967091
270	South Western Ghats moist deciduous forests	0	1	0	0	0.016	0	-9999	24.7796	148.298	1637.52	83.0275	558.487	23.7549	59.8251	66.4598	19.6706	29.8419	-120.789	-32.6923	559.036	0.28139	1.72572	37.8407	0.880696
271	South Western Ghats montane rain forests	1	0	2	0	0.041	0	-0.458781	23.1455	130.9	2760.51	97.5343	742.578	25.0676	55.1119	58.4484	22.0529	27.1227	-136.485	34.2727	742.022	0.410981	2.0036	63.5712	0.92727
272	Southern Annamites montane rain forests	1	7	12	5	0.164	0.007	2.2034	21.2433	176.154	2186.21	81.7069	931.11	27.3859	54.6483	63.8872	29.1048	25.7319	-179.825	-90.021	929.55	0.382726	2.90313	41.1584	1.03806
273	Southwest Borneo freshwater swamp forests	0	2	0	0	0.03	0	-0.396546	27.2957	31.1252	2622.06	30.6944	15.0969	32.9295	47.2251	200.24	22.1618	21.0037	-31.3208	-52.434	15.1041	0.020685	0.56974	5.58309	0.140461
274	Sri Lanka lowland rain forests	1	2	3	0	0.07	0.001	0.125607	25.6995	65.9777	3194.18	41.9781	268.629	24.9251	53.5028	48.9637	19.9892	42.6479	-88.1111	-59.0556	269.854	0.262789	0.958901	67.4297	0.642631
275	Sri Lanka montane rain forests	1	1	4	0	0.068	0.001	0.343946	19.9349	83.4576	2269.65	44.6279	1295.28	27.5503	53.5876	73.8355	24.3047	35.9714	-183.3	-68.7	1287.2	0.593346	2.05625	58.6192	1.56137
276	Sulu Archipelago rain forests	0	0	0	1	0.016	0	-9999	26.7095	35.242	1772.17	24.3202	72.6887	27.4208	50.2627	69.0213	23.7734	31.3895	-42.75	-117.875	69.6369	0.11254	0.831683	7.99472	0.163466
277	Sumatran freshwater swamp forests	0	0	0	0	-9999	-9999	-9999	26.6264	38.8672	2492.61	33.1865	16.9212	28.8239	48.7001	131.557	19.7576	30.8265	-33.9583	-98.7708	16.9175	0.019395	0.5594	5.80579	0.136478
278	Sumatran lowland rain forests	0	9	5	4	0.103	0.003	2.83775	25.7023	37.0652	2776.57	31.1266	168.952	26.6149	48.3849	67.6722	17.8809	27.1745	-71.8183	-56.8011	168.565	0.124034	0.777272	19.6147	0.26134
279	Sumatran montane rain forests	0	6	2	3	0.07	0.002	3.30384	20.3279	32.4742	2512.36	31.0397	1160.21	28.6418	50.2754	87.0621	26.1711	19.5959	-166.947	40.5962	1158.68	0.489402	1.23191	35.6234	0.46902
280	Sumatran peat swamp forests	0	1	0	0	0.016	0	-9999	26.6584	37.4668	2525.2	30.804	16.7223	30.5721	48.0094	185.364	20.5511	22.6157	-31.8989	-97.8914	16.7166	0.017021	0.542916	4.52579	0.125884
281	Sundaland heath forests	0	4	0	1	0.047	0.001	2.54571	27.1929	28.0135	2683.95	25.7714	50.1786	27.9463	46.3722	117.865	20.0141	18.0164	-31.7895	-11.5746	50.1596	0.041976	0.616866	6.63434	0.134787
282	Sundarbans freshwater swamp forests	0	0	0	0	-9999	-9999	-9999	26.2279	388.781	1794.39	92.7669	5.63529	26.2251	62.5275	102.109	20.0135	45.0092	-122.978	-84	5.61556	0.011676	0.889664	4.36958	0.101247
283	Taiwan subtropical evergreen forests	3	14	19	4	0.272	0.011	0.388675	18.7612	399.249	2514.43	69.393	826.008	27.724	53.7541	104.55	28.6014	42.4175	-148.229	-29.4381	818.023	0.500411	4.89854	100.357	1.17119
284	Tenasserim-South Thailand semi-evergreen rain forests	0	4	8	3	0.1	0.002	2.39146	26.214	92.814	2174.95	70.8974	221.037	21.8867	53.8463	48.2722	15.9834	27.2346	-85.4521	-24.9521	220.137	0.186088	1.0588	23.6932	0.504615
285	Tonle Sap freshwater swamp forests	0	0	0	0	-9999	-9999	-9999	27.5122	127.681	1388.91	76.5833	6.68144	29.8115	56.2565	68.8712	36.0137	34.8616	-49.1728	-100.198	6.68877	0.015993	0.72341	5.73897	0.164171
286	Tonle Sap-Mekong peat swamp forests	0	0	0	0	-9999	-9999	-9999	27.5581	112.069	1634.47	73.1095	7.84916	29.0854	55.6019	90.6515	30.7161	37.8229	-58.8675	-93.4578	7.85748	0.017733	0.701545	6.97703	0.16783
287	Upper Gangetic Plains moist deciduous forests	1	1	4	0	0.069	0.002	0.191974	25.2322	641.161	992.505	137.171	161.576	22.12	74.8165	98.9833	17.1934	41.8826	-133.868	-108.105	161.582	0.021248	0.918988	3.19686	0.162158
288	Western Java montane rain forests	0	4	0	2	0.047	0.001	3.16072	21.4847	39.7471	3002.44	48.2084	778.429	29.3178	53.6778	69.6051	28.5103	30.1672	-142.544	83.7468	777.878	0.42732	0.927603	46.8932	0.719046
289	Western Java rain forests	0	3	0	0	0.025	0	3.91386	25.857	45.6348	2654.55	50.7146	123.146	28.5848	54.0494	56.5281	23.4845	40.5362	-41.28	55.696	122.835	0.129081	0.785899	37.0567	0.61048
290	Central Deccan Plateau dry deciduous forests	1	0	0	0	0.016	0	-9999	27.0937	389.059	961.221	118.06	362.075	28.051	72.3278	98.2551	37.0874	35.4865	-26.9389	-114.074	362.067	0.054067	1.15248	3.08292	0.197373
291	Central Indochina dry forests	1	7	8	1	0.118	0.004	1.93487	26.6786	203.006	1428.61	87.121	177.554	22.8737	57.9084	82.0698	22.3	33.809	-71.7675	-107.871	177.754	0.053525	0.900564	6.39396	0.174928
292	Chhota-Nagpur dry deciduous forests	0	0	0	0	-9999	-9999	-9999	25.3298	496.26	1245.3	119.082	321.151	23.2404	64.5007	102.36	18.2018	36.6594	-160.504	-101.732	321.136	0.067227	1.23706	6.11609	0.169238
293	East Deccan dry-evergreen forests	0	0	0	0	-9999	-9999	-9999	28.5214	258.728	1130.36	90.2172	34.0827	25.6526	68.9612	68.7204	25.3397	44.2817	319.892	-88.973	33.7826	0.026324	0.984248	3.53124	0.320412
294	Irrawaddy dry forests	0	0	0	0	-9999	-9999	-9999	26.641	320.861	998.831	87.9868	171.857	22.9659	63.4474	101.853	24.5205	35.2613	-118.216	-83.8875	171.885	0.05277	1.12074	5.49868	0.131988
295	Khathiar-Gir dry deciduous forests	1	0	0	0	0.016	0	-9999	25.9336	528.382	804.23	151.867	346.759	25.9814	75.6404	104.808	31.1434	37.1269	-108.857	-109.091	346.582	0.046375	1.49865	4.74157	0.179626
296	Narmada Valley dry deciduous forests	0	0	0	0	-9999	-9999	-9999	25.7754	489.26	1082.52	141.026	408.029	28.7643	72.508	99.1765	36.9747	34.2864	-133.617	-109.363	408.012	0.072397	1.47329	8.53471	0.248067
297	North Deccan dry deciduous forests	0	0	0	0	-9999	-9999	-9999	26.4096	424.203	1419.67	124.834	300.233	24.0695	64.8373	99.9012	22.127	33.5229	-130.027	-102.885	300.235	0.095265	1.4635	3.65608	0.253453
298	South Deccan Plateau dry deciduous forests	0	0	1	0	0.016	0	-9999	26.316	207.085	771.738	82.4687	479.262	22.2004	67.71	38.7133	18.7082	36.4463	-33.6335	-85.8457	479.24	0.13343	1.26273	5.91383	0.412364
299	Southeast Indochina dry evergreen forests	0	6	2	2	0.072	0.001	2.92463	25.6777	155.782	1902.13	86.4176	258.042	24.5271	55.7101	53.3919	25.7247	27.1988	-96.905	-92.5515	258.087	0.127234	1.18275	12.4566	0.293401
300	Southern Vietnam lowland dry forests	0	1	1	2	0.046	0.001	0.735248	25.3396	211.088	1611.34	81.9983	219.779	25.9603	58.8309	81.1434	25.7036	35.5227	-99.699	-87.9806	217.786	0.286691	2.85491	15.466	1.49977
301	Sri Lanka dry-zone dry evergreen forests	0	1	1	0	0.03	0	-0.399939	27.272	127.781	1549.38	75.1255	90.3625	24.2024	58.8666	29.8214	21.0945	35.517	-29.7746	-67.8803	89.5822	0.064382	0.975024	12.6312	0.355198
302	Himalayan subtropical pine forests	2	0	6	0	0.095	0.002	-1.23815	18.0615	583.871	1529.33	96.1587	1332.28	25.8744	61.181	125.067	22.3053	33.8028	-171.445	-88.5741	1330	0.590089	6.71892	52.3906	1.80292
303	Luzon tropical pine forests	1	4	3	4	0.1	0.002	1.64874	19.68	144.052	2828.65	63.7034	1369.16	27.7845	52.8991	77.6392	27.3096	30.3441	-172.105	-69.4211	1367.23	0.654215	3.24952	58.7784	1.12359
304	Northeast India-Myanmar pine forests	0	0	0	0	-9999	-9999	-9999	17.6735	406.97	1999.14	93.2226	1379.82	29.249	53.225	108.037	35.3322	17.9283	-159.679	-5.32143	1379.55	0.624926	3.51318	28.4678	0.601244
305	Sumatran tropical pine forests	0	1	0	0	0.016	0	-9999	19.1194	35.6496	2320.49	31.3427	1441.94	29.8056	50.5868	101.745	30.0873	19.6585	-156.571	-83.7143	1436.77	0.526869	1.36746	20.4513	0.417347
306	Eastern Himalayan broadleaf forests	0	1	2	0	0.043	0.001	-0.728492	16.3503	463.122	1971.14	92.5819	1603.76	29.3783	53.5163	133.615	35.5945	19.7673	-157.982	49.6594	1603.63	0.788204	3.55771	106.852	1.11213
307	Northern Triangle temperate forests	0	1	0	0	0.016	0	-9999	15.9333	475.397	2525.68	92.1479	1466.28	30.2208	51.9418	128.93	37.3642	8.49282	-166.676	189.216	1467.12	0.65735	1.72139	128.49	1.81201
308	Western Himalayan broadleaf forests	1	0	2	0	0.041	0.001	-0.00993037	12.0825	667.643	1266.97	68.2519	2200.16	27.555	61.0196	164.288	27.9962	32.0495	-137.415	-94.3543	2203.88	0.884216	6.29959	57.6114	1.9322
309	Eastern Himalayan subalpine conifer forests	0	0	1	0	0.016	0	-9999	8.19498	500.371	1087.84	86.8103	3101.03	31.8857	55.7239	211.911	43.5244	15.894	-107.677	-55.5506	3097.92	1.13952	6.2442	99.3589	2.72685
310	Western Himalayan subalpine conifer forests	0	0	4	0	0.051	0.001	-0.335674	14.1599	691.276	911.166	77.9298	1971.68	24.6673	66.9981	128.595	24.7602	32.1337	-132.265	-95.3982	1972.25	0.797059	7.20883	34.8027	1.38515
311	Terai-Duar savanna and grasslands	0	0	0	0	-9999	-9999	-9999	24.4767	518.238	1895.12	121.396	160.648	22.7619	64.0804	94.8207	16.4855	37.9886	-148.054	-56.6518	161.338	0.045227	1.13237	11.8586	0.195043
312	Rann of Kutch seasonal salt marsh	0	0	0	0	-9999	-9999	-9999	26.9819	457.183	355.671	160.204	3.83544	25.2106	76.6373	78.6127	32.2281	15.8607	129.647	-80	3.81968	0.033074	1.13406	1.64445	0.240107
313	Kinabalu montane alpine meadows	0	5	2	9	0.094	0.005	2.57458	18.8571	38.3983	2428.37	24.0672	1640.91	29.6117	50.9092	116.288	29.5206	32.3471	-105	-11	1620.99	0.905695	3.10804	26.0493	0.800623
314	Aravalli west thorn scrub forests	0	0	0	0	-9999	-9999	-9999	25.4911	664.996	400.104	124.696	168.828	20.8363	79.6639	46.925	17.9182	38.5973	-74.6504	-98.2696	168.685	0.032203	1.21677	2.47214	0.32078
315	Deccan thorn scrub forests	0	0	0	0	-9999	-9999	-9999	26.5766	280.559	729.487	96.6873	458.695	27.2895	73.6197	61.9222	34.6879	36.7897	1.09971	-99.3519	458.116	0.056439	1.10657	5.21716	0.277981
316	Godavari-Krishna mangroves	0	0	0	0	-9999	-9999	-9999	27.9862	287.744	1175.76	100.648	5.02084	26.2925	67.7411	80.3849	24.4382	46.4271	156.222	-117.059	4.91602	0.01828	1.4091	2.97464	0.193843
317	Indus Valley desert	0	0	0	0	-9999	-9999	-9999	25.0141	843.24	217.657	96.7181	159.594	18.3187	81.9519	4.06841	13.6972	33.8699	-77.9538	-9999	159.586	0.01991	0.883275	0.859578	0.291567
318	Thar desert	0	0	0	0	-9999	-9999	-9999	26.6263	686.705	235.05	136.535	163.904	14.6453	81.8674	11.2514	9.87292	28.2357	30.7974	-105	163.903	0.021345	0.91706	1.10825	0.355035
319	Indochina mangroves	0	1	1	0	0.03	0	-0.399939	27.1975	124.041	1866.99	80.6772	5.40994	27.0434	56.6146	76.1296	23.3213	44.7431	-40	-67.2778	5.51845	0.022143	0.715491	8.42278	0.226846
320	Indus River Delta-Arabian Sea mangroves	0	0	0	0	-9999	-9999	-9999	26.5521	409.485	520.312	141.192	8.06601	24.2035	76.6608	51.1467	28.8077	42.9024	-104.077	-70.8	7.70037	0.034706	1.13943	4.92778	0.512064
321	Myanmar Coast mangroves	0	1	0	0	0.016	0	-9999	26.834	154.535	3119.75	100.487	12.6398	27.4803	55.5491	94.4775	25.4097	33.0181	-82.8636	68.7424	12.5106	0.033614	0.885835	13.2111	0.113149
322	Sunda Shelf mangroves	0	2	0	0	0.03	0	-0.490038	26.9658	37.7583	2599.73	28.2126	13.5782	31.0416	49.6964	159.599	25.3967	26.5844	-35.7714	4.43809	13.3819	0.026581	0.639555	7.70195	0.176601
323	Sundarbans mangroves	0	0	0	0	-9999	-9999	-9999	26.1069	358.46	2211.01	97.7145	5.83001	27.6148	59.9295	88.462	28.58	36.389	-114.362	-78.2609	5.74383	0.013655	0.891092	6.22656	0.104653
324	Sonoran-Sinaloan subtropical dry forest	0	0	0	1	0.016	0	-9999	22.6851	550.06	515.17	109.647	397.297	25.0218	74.8285	70.0452	24.1379	22.9401	-160.257	-90.3889	396.295	0.157305	3.84384	10.6706	0.531418
325	Bermuda subtropical conifer forests	0	0	0	0	-9999	-9999	-9999	22.2012	339.666	1505.92	22.0614	19.7949	26.1329	56.7015	97.451	29.7538	52.5882	-9999	-9999	17.3642	0.084227	2.22724	3.37978	0.082574
326	Sierra Madre Occidental pine-oak forests	2	5	4	4	0.128	0.002	0.178841	15.4808	435.406	751.296	99.2024	1961.66	25.8671	62.4641	82.2589	22.6032	20.062	-153.509	-101.165	1959.3	0.344945	5.18832	13.8229	0.677944
327	Sierra Madre Oriental pine-oak forests	2	6	6	4	0.15	0.003	0.87997	17.661	389.774	517.912	71.795	1663.49	25.2267	70.9206	42.2559	26.082	20.795	-160.362	-105.833	1659.51	0.308949	9.40006	19.2757	1.01038
328	Allegheny Highlands forests	3	0	1	0	0.052	0.001	-0.550119	7.43368	937.796	1035.42	17.3325	477.178	34.2947	50.5794	238.705	46.066	31.4079	-160.01	-105	477.078	0.130737	0.99333	8.01683	0.221703
329	Appalachian mixed mesophytic forests	3	0	3	1	0.071	0.001	0.692029	11.5738	846.331	1179.63	15.8298	406.9	28.5293	52.5742	134.454	31.4264	33.2909	-174.172	-105.898	406.552	0.094162	1.90365	6.71701	0.130919
330	Appalachian Piedmont forests	3	0	2	0	0.059	0.001	-0.16373	15.251	770.597	1226.09	13.9383	206.811	21.9417	52.1651	61.2638	20.3846	37.0803	-180.727	-106.793	206.961	0.037586	1.11152	3.34325	0.095068
331	Appalachian-Blue Ridge forests	3	1	4	0	0.086	0.002	0.0166412	11.8313	816.262	1215.36	13.933	490.937	28.0665	53.0771	139.6	30.3475	35.6455	-170.841	-103.641	491.044	0.151407	2.85281	13.031	0.178717
332	East Central Texas forests	1	0	0	0	0.016	0	-9999	19.302	720.875	971.613	28.3116	119.531	19.5586	62.4093	44.4175	17.9704	27.7574	-186.583	-110.226	119.533	0.020501	0.987105	1.97822	0.134635
333	Eastern Canadian Forest-Boreal transition	2	0	2	0	0.052	0.001	-0.519902	2.47911	1174.52	980.51	22.5617	372.445	35.7868	48.4166	258.407	46.0452	12.6865	-162.359	-113.642	372.403	0.059916	1.46266	5.81408	0.256589
334	Eastern Great Lakes lowland forests	3	0	3	0	0.075	0.001	-1.01543	6.38566	1053.71	987.51	17.1423	177.585	29.3243	60.3805	173.207	33.5747	44.3281	-153.752	-107.398	176.525	0.036807	1.43685	4.14118	0.197898
335	Gulf of St. Lawrence lowland forests	0	0	0	0	-9999	-9999	-9999	4.90811	1013.02	1140.37	11.1005	64.2523	28.6492	46.2184	171.898	34.3557	30.0851	-165.773	-105.032	63.1306	0.031566	1.18629	3.70133	0.160554
336	Interior Plateau US Hardwood Forests	2	0	3	0	0.059	0.001	-0.165484	13.4591	860.171	1281.49	15.8696	225.579	24.8196	55.5525	82.5152	22.3201	39.2919	-180.724	-111.607	225.801	0.042974	1.31798	3.32682	0.076734
337	Mississippi lowland forests	1	0	0	0	0.016	0	-9999	17.4683	776.722	1397.01	19.6893	42.227	26.8998	59.0892	95.6272	29.1195	37.7188	-180.709	-106.799	42.0614	0.018757	1.02849	1.65374	0.095315
338	New England-Acadian forests	4	0	3	0	0.086	0.001	-1.05321	4.62163	1027.59	1173.79	15.1597	291.881	35.1417	46.891	260.627	45.5605	24.0751	-160.026	-106.828	290.254	0.094202	1.61286	11.2345	0.239684
339	Northeast US Coastal forests	3	0	2	0	0.063	0.001	-0.574011	10.2377	914.952	1140.9	10.5401	111.506	29.3234	53.635	225.011	34.4762	49.4637	-159.842	-113.482	111.666	0.056044	1.39823	4.96225	0.111041
340	Ozark Highlands mixed forests	2	0	3	0	0.059	0.001	-0.165484	13.4187	909.558	1107.23	22.8434	293.9	23.6489	56.7785	66.4724	20.2726	30.9778	-172.598	-108.936	293.948	0.042661	1.36511	1.90922	0.091376
341	Ozark Mountain forests	2	0	2	1	0.062	0.001	-0.442954	15.4664	837.649	1250.6	23.1592	260.547	23.6222	54.7192	69.0827	21.2352	27.6119	-168.534	-112.028	260.441	0.077535	2.25341	5.23951	0.1247
342	Southern Great Lakes forests	2	0	0	0	0.027	0.001	0.709117	9.36513	974.636	939.154	21.565	262.641	25.2826	62.8444	106.312	28.1903	48.7603	-159.401	-104.317	262.616	0.024135	0.933036	1.90287	0.114636
343	Upper Midwest US forest-savanna transition	3	0	1	0	0.048	0.001	0.0821045	6.4341	1165.03	779.471	47.4451	323.832	23.674	59.8045	72.4062	28.2503	38.0227	-167.162	-115.257	323.817	0.036015	1.01734	2.22849	0.180257
344	Western Great Lakes forests	3	0	1	0	0.048	0.001	0.0821045	3.89818	1177.5	735.99	45.0664	368.597	26.7783	53.8244	160.58	33.0042	18.869	-161.599	-116.374	368.548	0.028507	1.45158	2.05289	0.233396
345	Alberta-British Columbia foothills forests	0	0	0	0	-9999	-9999	-9999	1.18516	1019.08	531.918	59.7839	953.169	41.8082	53.2918	261.38	56.8309	8.85985	-144.04	-129.026	953.181	0.05381	3.98693	3.03418	0.425912
346	Arizona Mountains forests	1	0	4	0	0.059	0.001	-0.291631	10.8707	733.84	458.631	55.0911	1954.6	21.0531	69.668	35.8045	21.1889	12.428	-160.497	-104.24	1953.46	0.209542	4.44786	10.3818	0.442964
347	Atlantic coastal pine barrens	2	0	0	0	0.027	0.001	0.709117	11.6012	860.483	1136.31	11.2302	24.5302	22.9978	49.6332	209.253	34.1373	52.6639	-147.962	-108.327	24.4045	0.025477	1.37789	2.12918	0.093051
348	Blue Mountains forests	0	0	0	0	-9999	-9999	-9999	6.53854	722.687	453.925	34.7082	1305.08	26.3888	64.5031	114.116	30.5163	12.4745	-150.814	-117.789	1305.05	0.273856	8.095	13.1124	0.638155
349	British Columbia coastal conifer forests	1	0	1	0	0.026	0	1.21414	3.45056	622.286	1692.15	42.7181	980.356	35.2579	49.1377	274.462	50.4372	7.98077	-148.459	-20.4575	971.7	0.624092	10.0748	54.7769	1.18461
350	Central British Columbia Mountain forests	1	0	0	0	0.016	0	-9999	0.863516	871.972	705.503	28.0682	1130.21	40.2949	53.2451	278.534	53.3327	6.7933	-145.865	-114.714	1130.2	0.24049	9.74965	15.0105	0.536608
351	Central Pacific Northwest coastal forests	1	1	1	0	0.026	0	3.78245	8.57794	442.814	2577.39	57.5212	326.185	39.1416	49.3043	278.185	56.8653	17.0376	-144.211	16.244	321.385	0.259743	5.10938	57.987	0.426146
352	Central-Southern Cascades Forests	1	0	2	0	0.037	0	0.498714	7.44599	582.5	1592.56	63.4585	1138.97	32.8023	55.1066	268.759	43.2661	15.0871	-156.709	-81.7183	1138.08	0.318878	5.67125	57.3311	0.504518
353	Colorado Rockies forests	1	0	2	0	0.037	0	0.498714	3.66569	806.881	503.094	32.3451	2694.88	24.2877	62.9243	81.9975	26.5466	14.7958	-136.516	-112	2694.35	0.261957	6.92842	17.9212	0.880887
354	Eastern Cascades forests	0	0	0	0	-9999	-9999	-9999	6.8971	697.172	580.313	53.5059	1391.79	25.4804	62.6331	146.795	29.1843	15.2728	-165.148	-115	1391.97	0.157354	4.77469	22.1834	0.472808
355	Fraser Plateau and Basin conifer forests	0	0	1	0	0.016	0	-9999	2.16148	817.075	549.621	31.7527	1175.19	35.3393	55.7164	243.781	39.4141	7.19566	-155.733	-107.962	1175.27	0.160325	5.28483	10.4058	0.577779
356	Great Basin montane forests	0	0	0	0	-9999	-9999	-9999	4.48694	728.363	419.706	23.748	2705.43	23.1919	67.4428	82.0385	25.7426	8.42755	-144.73	-9999	2681.9	0.436446	8.75293	25.0399	0.957442
357	Klamath-Siskiyou forests	0	0	1	0	0.016	0	-9999	10.4399	561.531	1280.27	76.8454	926.16	29.3129	57.6381	187.621	33.8609	17.6355	-161.979	-95.7816	925.776	0.371098	9.06173	51.6772	0.579663
358	North Cascades conifer forests	1	1	1	0	0.026	0	3.78245	4.61745	695.454	1288.42	50.0716	1229.32	30.7581	53.5843	244.108	38.9097	14.5607	-151.117	-76.0459	1228.35	0.551937	7.83367	44.742	1.38548
359	Northern California coastal forests	0	0	1	0	0.016	0	-9999	12.1007	355.733	1397.45	85.576	319.82	30.0769	55.6414	177.785	36.8548	27.0629	-164.145	-83.4615	319.883	0.179857	5.72508	36.8606	0.289186
360	Northern Pacific Alaskan coastal forests	1	0	1	0	0.026	0	1.21414	4.61415	569.561	2471.15	36.4321	286.741	33.1204	46.4851	194.219	55.8722	8.86206	-109.138	16.5087	278.823	0.294511	8.90017	24.9479	0.402868
361	Northern Rockies conifer forests	1	0	1	0	0.026	0	1.21414	2.60055	797.169	835.531	28.4366	1499.6	35.3365	56.2176	242.713	42.1417	11.58	-148.08	-112.723	1499.47	0.418497	9.47081	29.6376	0.774077
362	Okanogan dry forests	1	0	1	0	0.026	0	1.21414	3.73478	790.881	617.443	25.4096	1260.72	32.5691	57.6086	219.185	35.0387	15.4023	-157.083	-116.027	1260.65	0.357952	7.54916	26.9839	0.775008
363	Piney Woods	1	0	0	0	0.016	0	-9999	17.9563	747.931	1293.06	16.8618	83.7321	22.212	52.9413	50.034	22.3879	29.4382	-177.759	-106.921	83.7278	0.023013	0.911338	2.16285	0.100538
364	Puget lowland forests	1	1	2	0	0.039	0	2.11897	8.9726	511.007	1544.08	56.64	284.808	33.4917	53.2517	231.181	44.8024	40.7084	-160.161	-73.443	282.49	0.202261	3.87534	33.6456	0.52544
365	Queen Charlotte Islands conifer forests	1	0	1	0	0.026	0	1.21414	7.08141	406.004	2314.31	41.2414	211.137	38.62	45.8666	292.823	57.3938	9.52862	-96.1731	16.6923	206.608	0.199575	5.68526	46.8101	0.459364
366	Sierra Nevada forests	1	0	0	0	0.016	0	-9999	7.91314	658.632	843.751	75.4444	1912.05	20.4694	59.495	137.087	24.5028	17.5929	-149.036	-102.782	1910.87	0.42732	5.94074	28.4256	0.595813
367	South Central Rockies forests	1	0	2	0	0.037	0	0.498714	2.66829	800.674	502.816	30.8849	2134.44	26.9967	59.905	126.187	31.955	11.12	-164.338	-117.473	2133.33	0.320209	11.7178	8.99989	0.816909
368	Wasatch and Uinta montane forests	1	0	2	0	0.037	0	0.498714	4.68396	814.823	409.758	18.9493	2448.72	25.2306	65.677	84.0332	26.7507	15.102	-153.172	-127	2447.36	0.295812	8.7359	10.5137	0.843034
369	Alaska Peninsula montane taiga	0	0	0	0	-9999	-9999	-9999	2.04914	579.93	1009.54	26.8463	360.679	32.3754	51.5155	226.045	46.0539	5.35454	-82.2527	-51.148	353.971	0.209434	11.1359	10.6722	0.477906
370	Central Canadian Shield forests	1	0	1	0	0.026	0	1.21414	-0.046043	1274.24	879.824	32.6165	329.706	38.8908	48.6709	282.912	62.1388	7.3856	-156.126	-107.474	329.691	0.030277	1.46146	2.41069	0.220902
371	Cook Inlet taiga	0	0	0	0	-9999	-9999	-9999	1.11144	928.055	712.839	44.7867	186.476	33.725	48.4509	186.489	47.8187	12.6979	-86.2695	-81.25	184.687	0.06522	4.9419	3.44463	0.348633
372	Copper Plateau taiga	0	0	0	0	-9999	-9999	-9999	-2.89126	1202.87	408.501	56.1391	661.656	34.3899	54.2651	207.037	48.2915	8.18334	-87.9709	-114.8	662.217	0.058379	4.65203	3.77436	0.534719
373	Eastern Canadian forests	1	0	1	0	0.026	0	1.21414	-0.062672	1107.99	1105.13	22.6824	364.194	34.9367	47.1723	256.61	54.0479	7.60531	-142.794	-87.7541	361.469	0.086286	2.44704	6.06083	0.203448
374	Eastern Canadian Shield taiga	1	0	0	0	0.016	0	-9999	-4.12027	1278.35	739.314	37.0336	377.782	36.0559	47.6363	226.286	67.9158	2.87553	-144.328	-108.343	376.491	0.052283	2.0554	3.06185	0.278194
375	Interior Alaska-Yukon lowland taiga	1	0	0	0	0.016	0	-9999	-4.006	1352.27	352.182	61.5864	241.573	36.1326	52.5152	232.422	49.5761	4.01021	-107.034	-149.759	241.635	0.046461	5.57143	2.22778	0.593674
376	Mid-Canada Boreal Plains forests	0	0	0	0	-9999	-9999	-9999	0.573364	1266.84	470.693	57.98	502.805	37.7708	58.2583	223.455	53.9549	10.3172	-126.643	-134.619	502.82	0.024734	2.05281	1.68315	0.350946
377	Midwest Canadian Shield forests	1	0	0	0	0.016	0	-9999	-1.63954	1409.15	576.13	50.8435	324.971	36.8637	48.4509	240.097	55.03	2.16204	-152.361	-128.043	324.967	0.024411	1.49185	1.61762	0.272318
378	Muskwa-Slave Lake taiga	1	0	0	0	0.016	0	-9999	-2.06558	1395.66	400.432	52.5681	408.088	40.2284	56.8716	233.142	58.034	3.03174	-123.844	-131.471	408.121	0.028972	2.9349	1.85131	0.407817
379	Northern Canadian Shield taiga	0	0	0	0	-9999	-9999	-9999	-7.06803	1568.6	340.09	54.0292	321.006	34.8024	49.4838	170.491	65.8687	0.296038	-160.256	-135.367	321.002	0.022694	2.14094	1.55816	0.442588
380	Northern Cordillera forests	1	0	1	0	0.026	0	1.21414	-2.134	952.356	629.931	37.2173	1343.6	36.363	53.4569	232.951	51.2258	3.33309	-147.961	-101.258	1343.54	0.278445	13.6118	17.262	0.767353
381	Northwest Territories taiga	0	0	0	0	-9999	-9999	-9999	-6.45178	1546.88	279.096	49.5301	239.837	39.0974	53.4558	171.265	81.6772	1.45329	-136.415	-143.5	239.636	0.024169	2.69718	1.64055	0.592013
382	Southern Hudson Bay taiga	1	0	0	0	0.016	0	-9999	-2.79852	1415.08	594.944	47.0544	96.7065	43.1748	45.7252	290.506	84.3686	2.49239	-149.406	-118.976	96.5838	0.013589	1.35071	1.60249	0.275237
383	Watson Highlands taiga	1	0	0	0	0.016	0	-9999	-3.83044	1238.71	386.278	49.9054	1044.82	34.7157	54.0529	189.124	48.4803	4.50678	-129.235	-116.556	1044.89	0.114893	9.65426	4.38768	0.750738
384	Western Gulf coastal grasslands	1	0	0	0	0.016	0	-9999	21.4483	599.781	1006.74	38.0331	25.6094	22.8931	68.2943	55.9826	25.9388	33.192	-190.847	-103.087	25.5033	0.018575	0.913313	2.05614	0.194132
385	California Central Valley grasslands	0	0	0	0	-9999	-9999	-9999	16.7392	656.76	332.865	84.6764	72.4692	22.0041	71.9386	37.3698	23.6729	42.9875	-164.335	-99.6667	72.7729	0.040872	2.68077	2.972	0.326394
386	Canadian Aspen forests and parklands	0	0	0	0	-9999	-9999	-9999	3.51553	1236.23	469.031	60.363	571.004	27.3593	68.1947	79.3609	33.4389	29.6385	-146.548	-130.074	571.014	0.020623	1.20788	1.64975	0.293331
387	Central US forest-grasslands transition	3	0	2	0	0.065	0.001	-0.939751	10.8554	1013.77	984.201	27.0634	196.52	24.7836	61.805	64.2679	24.7685	48.2267	-165.213	-107.528	196.541	0.02303	0.945714	1.53203	0.092733
388	Central Tallgrass prairie	3	0	1	0	0.052	0.001	-0.550119	9.96285	1092.64	862.853	46.1391	323.06	26.5246	63.3574	41.7287	31.5062	41.8512	-161.514	-110.066	323.052	0.022214	0.786442	1.69596	0.142262
389	Central-Southern US mixed grasslands	1	0	1	0	0.027	0	0.400761	13.4482	976.01	678.671	51.3919	541.049	21.898	67.607	33.5845	18.773	24.5909	-168.65	-110.679	541.058	0.022671	0.990451	1.6711	0.16775
390	Cross-Timbers savanna-woodland	2	0	2	0	0.045	0.001	0.492756	17.11	835.103	869.199	34.9782	312.279	21.9472	66.1356	84.212	17.4823	29.6079	-176.163	-112.159	312.266	0.029219	1.1889	2.07543	0.142663
391	Edwards Plateau savanna	1	0	1	0	0.027	0	0.400761	18.259	734.261	629.705	41.7307	595.324	22.3581	74.4142	37.6146	18.947	15.8072	-171.539	-112.544	595.236	0.038359	1.70803	2.27105	0.183238
392	Flint Hills tallgrass prairie	1	0	0	0	0.016	0	-9999	13.0355	1002.77	881.387	47.6792	387.293	26.3253	64.3368	63.3602	27.7606	25.0128	-171.214	-111.198	387.284	0.028401	0.871139	1.67928	0.139049
393	Mid-Atlantic US coastal savannas	2	0	1	1	0.039	0.001	1.91898	15.8734	755.824	1236.68	21.6721	15.0228	22.8679	49.684	117.368	27.6564	37.6216	-174.337	-96.9649	14.9749	0.019237	0.921869	1.50925	0.088697
394	Montana Valley and Foothill grasslands	0	0	0	0	-9999	-9999	-9999	5.27376	887.02	386.136	50.311	1515.45	24.5962	68.8101	50.7436	27.2884	18.1182	-168.784	-122.7	1516.83	0.129713	5.36633	6.02411	0.764817
395	Nebraska Sand Hills mixed grasslands	0	0	0	0	-9999	-9999	-9999	8.91385	1032.44	511.767	62.2258	939.838	14.378	67.2943	17.3028	16.1708	13.1562	-139.213	-132.306	939.789	0.025137	1.34546	1.58187	0.268103
396	Northern Shortgrass prairie	0	0	0	0	-9999	-9999	-9999	5.88961	1119.62	383.055	63.0741	819.053	24.5196	70.3948	33.6616	26.4142	17.2939	-156.749	-137.113	819.083	0.033513	1.90483	1.98	0.349563
397	Northern Tallgrass prairie	0	0	0	0	-9999	-9999	-9999	3.43467	1329.45	525.221	58.3061	288.654	26.7537	71.7047	79.0611	35.1526	31.0373	-156.989	-137.667	288.673	0.013557	0.983	1.50982	0.259788
398	Palouse prairie	0	0	0	0	-9999	-9999	-9999	9.6507	811.504	332.125	43.5202	556.319	21.687	70.1682	31.9499	22.4787	23.9566	-160.118	-101.8	556.517	0.128972	3.54823	6.93072	0.599187
399	Southeast US conifer savannas	4	3	7	1	0.121	0.002	2.19659	18.1555	681.121	1360.67	25.8708	71.5422	19.3359	52.2	90.9648	22.4212	35.7887	-169.852	-103.467	71.4014	0.025255	0.818687	2.23816	0.109216
400	Southeast US mixed woodlands and savannas	0	0	0	0	-9999	-9999	-9999	22.8576	398.683	1286.35	44.488	7.29412	21.8045	61.2016	116.631	34.8798	64.1429	-9999	-9999	6.52976	0.026983	0.742369	2.28688	0.146502
401	Texas blackland prairies	0	0	0	0	-9999	-9999	-9999	18.9292	760.618	953.813	30.0418	161.522	22.4434	67.2413	41.1545	18.5975	38.4334	-182.849	-116.072	161.521	0.02153	1.0015	2.05556	0.139071
402	Western shortgrass prairie	1	0	3	0	0.045	0.001	0.416029	12.3656	887.836	430.834	63.2529	1229.08	18.5344	74.2035	12.935	15.9217	16.4813	-171.492	-117.638	1229.11	0.034855	1.55143	1.76617	0.269212
403	Willamette Valley oak savanna	0	0	1	0	0.016	0	-9999	11.167	533.82	1332.01	65.7058	144.454	30.5078	56.209	134.556	37.3032	47.3648	-163.111	-104.778	145.446	0.089255	2.59762	42.7624	0.234707
404	Ahklun and Kilbuck Upland Tundra	0	0	0	0	-9999	-9999	-9999	-0.235473	901.062	621.9	49.4192	276.285	39.6221	49.694	278.342	55.028	1.54962	-99.2718	-105.543	275.855	0.068979	11.1924	5.20944	0.443936
405	Alaska-St. Elias Range tundra	1	0	0	0	0.016	0	-9999	-4.37249	982.103	574.113	52.6941	1248.55	32.9603	52.7562	205.044	44.4696	3.00281	-137.805	-70.7719	1247.74	0.27487	16.9791	10.8216	1.24206
406	Aleutian Islands tundra	0	0	0	0	-9999	-9999	-9999	3.30325	378.31	1272.69	31.5616	252.413	36.8074	53.024	261.456	56.1633	9.48908	-72.1719	-8.75	248.514	0.238709	8.50089	13.8219	0.377423
407	Arctic coastal tundra	0	0	0	0	-9999	-9999	-9999	-10.796	1400.33	143.921	72.2065	25.9889	37.0786	60.3041	213.271	57.1792	4.56602	-144.64	-9999	25.6017	0.015295	1.86184	1.11425	0.639246
408	Arctic foothills tundra	0	0	0	0	-9999	-9999	-9999	-9.12909	1368.96	194.85	64.7558	229.172	38.6821	55.503	235.975	53.6642	2.95887	-127.35	-9999	228.272	0.036369	3.41162	1.75323	0.830794
409	Beringia lowland tundra	0	0	0	0	-9999	-9999	-9999	-0.591083	945.655	536.439	54.4687	51.5177	37.8426	51.7044	241.86	56.4911	4.5315	-103.543	-117.296	50.7716	0.025883	2.59254	2.22893	0.347841
410	Beringia upland tundra	1	0	0	0	0.016	0	-9999	-4.35435	1095.8	397.173	60.2041	191.788	36.0634	52.2416	203.995	48.9234	4.52629	-102.804	-171.333	190.07	0.055847	6.67156	3.34073	0.63403
411	Brooks-British Range tundra	1	0	1	0	0.026	0	1.21414	-9.471	1313.73	246.471	64.799	880.389	34.2269	54.9609	191.561	46.5471	1.92685	-141.825	-9999	880.255	0.181618	12.7616	5.39946	2.23762
412	Canadian High Arctic tundra	0	0	0	0	-9999	-9999	-9999	-17.8503	1413.49	174.723	72.2009	459.29	33.7617	66.4083	182.917	58.0853	3.57285	-144.315	-130.333	453.658	0.143153	6.19277	1.98365	0.555214
413	Canadian Low Arctic tundra	0	0	0	0	-9999	-9999	-9999	-10.2145	1512.37	254.054	58.6231	216.134	33.4885	57.3541	154.678	60.8356	1.46677	-160.144	-142	214.606	0.025089	2.30251	1.47442	0.511472
414	Canadian Middle Arctic Tundra	0	0	0	0	-9999	-9999	-9999	-13.2433	1467.94	217.363	59.7025	163.417	34.0164	64.2112	180.073	55.6552	2.26532	-150.471	-125.556	161.262	0.041731	2.4905	2.16898	0.775069
415	Davis Highlands tundra	0	0	0	0	-9999	-9999	-9999	-14.0946	1237.91	337.24	55.6365	678.148	33.6794	62.6885	159.041	55.5686	4.00498	-126.384	-83.375	664.424	0.258532	4.78637	9.93188	1.50155
416	Interior Yukon-Alaska alpine tundra	0	0	0	0	-9999	-9999	-9999	-5.73398	1398.7	292.334	71.3763	727.526	35.0567	52.5665	221.917	44.7958	3.44734	-118.718	-141.75	727.422	0.118797	10.6005	2.95188	1.21509
417	Kalaallit Nunaat Arctic steppe	1	0	0	0	0.016	0	-9999	-9.14834	817.746	616.406	30.8056	725.507	32.8421	61.19	182.945	63.2784	4.52328	-113.584	-56.8876	706.18	0.209025	5.00966	11.9574	0.619169
418	Kalaallit Nunaat High Arctic tundra	0	0	0	0	-9999	-9999	-9999	-16.8391	1154.46	190.438	39.5897	350.18	37.626	66.693	208.022	77.8435	3.54219	-111.833	-9999	344.447	0.15781	10.1409	1.77978	0.335011
419	Ogilvie-MacKenzie alpine tundra	1	0	0	0	0.016	0	-9999	-7.1436	1386.49	393.795	50.6337	1048.22	32.9475	51.9304	162.365	44.9892	2.4173	-135.975	-125.387	1048.19	0.141883	11.1149	6.02421	1.17597
420	Pacific Coastal Mountain icefields and tundra	1	0	1	0	0.026	0	1.21414	-0.925427	726.023	1481.01	34.8416	1003.11	32.7787	51.4324	230.653	49.5426	5.91259	-118.466	-15.6098	994.548	0.430519	14.4388	34.0122	0.828662
421	Torngat Mountain tundra	0	0	0	0	-9999	-9999	-9999	-6.1054	1098.79	669.456	34.0731	495.75	29.5768	55.3471	141.193	51.5536	4.19331	-149.161	-118.02	487.972	0.234233	4.28634	9.6076	0.560719
422	California coastal sage and chaparral	0	0	1	1	0.03	0.003	-0.453266	16.6961	446.316	346.086	86.6081	500.937	19.5268	69.6492	28.6614	18.4923	43.627	-160.205	-107.333	500.224	0.143276	4.5712	9.35696	0.681378
423	California interior chaparral and woodlands	0	0	1	0	0.016	0	-9999	15.198	576.908	624.605	88.5447	393.521	23.1129	65.7129	56.2763	26.5338	26.6928	-168.977	-99.7901	393.888	0.156011	4.20268	25.1027	0.331086
424	California montane chaparral and woodlands	0	0	1	1	0.027	0.003	0.563528	13.119	581.395	494.078	81.1159	1348.15	19.1483	68.3041	47.9396	19.3594	19.6991	-166.03	-117	1345.35	0.349534	5.25524	25.5699	0.813862
425	Santa Lucia Montane Chaparral & Woodlands	0	0	0	0	-9999	-9999	-9999	13.0399	387.852	695.01	92.2272	536.169	24.1938	63.9699	86.1694	28.3779	20.5619	-175.059	-83.3333	536.009	0.217582	8.11487	32.8762	0.413147
426	Baja California desert	0	0	0	1	0.016	0	-9999	19.8912	425.045	145.56	80.7704	321.845	21.519	78.8117	6.80449	15.3276	14.681	-164.456	-9999	320.044	0.083379	2.77189	3.8837	0.92997
427	Central Mexican matorral	0	2	0	5	0.058	0.001	2.04544	16.8783	266.525	524.989	91.941	2074.11	24.5757	69.9213	35.5935	20.5543	34.4514	-145.658	-121.333	2074.9	0.102555	2.2528	6.39953	0.590372
428	Chihuahuan desert	0	2	2	1	0.04	0	2.67678	17.7009	662.079	335.617	79.6493	1280.6	20.4948	78.5395	6.97538	16.2991	15.6858	-174.686	-95.3333	1281.07	0.089812	2.99437	3.97153	0.483224
429	Colorado Plateau shrublands	0	0	3	0	0.035	0	0.934492	10.2778	888.615	282.627	38.0969	1850.34	16.9166	77.6864	11.2464	15.0337	13.2988	-165.759	-130.5	1850.64	0.136183	4.69584	5.75309	0.506086
430	Great Basin shrub steppe	1	0	0	0	0.016	0	-9999	9.39659	859.089	254.759	24.7255	1687.29	18.1224	78.6079	13.213	18.6137	11.6347	-163.979	-120	1688.15	0.140885	4.70729	6.2768	0.642827
431	Gulf of California xeric scrub	0	0	0	0	-9999	-9999	-9999	21.9017	496.018	178.146	100.7	297.75	22.9638	80.0303	5.36088	18.4865	18.1999	-161.873	-9999	293.202	0.136267	2.42763	7.65803	1.19509
432	Meseta Central matorral	1	3	1	2	0.071	0.002	0.651435	17.8964	345.085	405.944	78.9275	1798.17	24.0786	77.1191	14.913	21.5677	21.1044	-171.137	-111.654	1798.89	0.110501	3.02454	5.25257	0.547733
433	Mojave desert	0	0	0	0	-9999	-9999	-9999	17.5282	829.351	164.818	48.5997	925.264	12.5237	80.7869	1.70444	11.6844	14.3041	-156.639	-9999	925.966	0.229884	5.00587	7.05113	0.731039
434	Snake-Columbia shrub steppe	0	0	1	0	0.016	0	-9999	7.63595	836.1	309.223	30.1534	1513.29	22.1278	72.5152	25.9834	24.3275	13.4179	-170.816	-154.667	1513.37	0.110123	4.20857	5.71835	0.461364
435	Sonoran desert	0	1	0	1	0.021	0	3.48123	21.5182	721.917	215.945	66.8886	406.53	17.4899	79.8684	4.13803	11.6773	18.6234	-142.795	-90	406.556	0.088017	2.72295	3.9267	0.523838
436	Tamaulipan matorral	0	0	1	0	0.016	0	-9999	22.3129	519.324	697.313	69.2599	432.902	24.9425	76.9031	34.5486	26.9295	24.327	-186.87	-115.741	433.555	0.096428	4.45433	5.17962	0.438732
437	Tamaulipan mezquital	0	0	0	0	-9999	-9999	-9999	21.9739	634.071	539.685	54.3261	236.726	21.8414	77.9491	22.8652	19.8527	20.2105	-182.36	-110.869	236.833	0.0257	1.29102	1.79555	0.257591
438	Wyoming Basin shrub steppe	0	0	0	0	-9999	-9999	-9999	5.38381	951.568	268.294	38.058	1968.21	20.1227	75.9716	17.6557	19.2368	12.0138	-169.459	-9999	1968.59	0.0776	4.5498	3.61916	0.717675
439	Alto Paran?Atlantic forests	3	5	8	7	0.169	0.002	2.56456	21.13	286.915	1480.06	43.0944	428.75	21.309	54.5969	19.8504	13.0752	33.878	-119.404	-94.5884	428.776	0.096173	1.08418	5.67042	0.204727
440	Araucaria moist forests	3	3	4	6	0.129	0.001	1.91836	17.13	316.495	1652.08	20.8623	804.562	27.964	51.9225	36.7486	19.1836	29.7637	-166.149	-78.6289	804.506	0.13595	1.5674	8.61179	0.241299
441	Atlantic Coast restingas	0	0	2	0	0.03	0	-0.46697	21.5897	261.171	1360.51	32.9243	12.9548	20.4743	57.7856	61.243	21.1132	37.2647	-74.2	-82.52	12.8421	0.023231	0.661345	10.4984	0.347408
442	Bahia coastal forests	2	4	7	7	0.141	0.002	3.02115	22.9714	169.119	1293.31	38.513	263.486	21.331	54.3383	33.1036	13.8461	30.9412	-136.006	-103.941	262.529	0.165251	0.671671	9.70626	0.458434
443	Bahia interior forests	3	2	7	3	0.139	0.002	0.229331	21.3488	196.202	1153.95	71.2879	598.941	21.2158	54.9533	18.1639	12.7061	32.5263	-159.97	-103.701	598.853	0.203763	0.982754	8.74425	0.481585
444	Bolivian Yungas	5	11	8	19	0.228	0.004	4.22545	20.7102	148.514	1701.41	58.7261	1352.22	26.274	52.8621	69.3973	23.6659	15.9577	-160.993	-92.5299	1352.35	0.461625	2.41782	42.2933	0.699234
445	Caatinga Enclaves moist forests	2	1	3	1	0.087	0.001	-1.17071	23.5955	74.2075	1177.41	103.702	533.659	16.8099	56.3321	13.8879	11.4765	28.9791	-76	-86.2857	532.296	0.359855	1.09733	39.1109	1.1897
446	Caqueta moist forests	0	4	3	6	0.105	0.001	2.40256	25.9773	67.9482	2801.1	34.1143	215.763	19.904	45.5345	36.9508	14.4858	4.77609	-180.076	122.452	215.737	0.03426	0.545598	10.9145	0.310936
447	Catatumbo moist forests	0	1	4	0	0.069	0.001	-1.56163	26.839	51.5768	1906.33	49.1824	213.162	25.6378	56.5195	55.7125	23.3392	33.2002	-64	-106.015	215.37	0.200687	0.750367	83.7593	3.22515
448	Cauca Valley montane forests	3	10	6	11	0.191	0.004	3.0199	17.8598	30.2584	2160.23	37.3418	1875.1	30.3933	54.6913	100.704	38.1252	34.9902	-155.62	-81.93	1873.42	0.684538	1.33123	81.7559	3.10596
449	Cayos Miskitos-San Andr? and Providencia moist forests	0	0	0	0	-9999	-9999	-9999	26.5208	78.2279	1988.11	58.1012	33.8675	34.2063	60.54	193.895	35.4619	51.6	-9999	-9999	32.9148	0.093604	0.5595	23.9241	0.635832
450	Central American Atlantic moist forests	2	6	8	8	0.193	0.004	1.0889	24.7787	115.431	2231.33	56.304	294.882	26.6427	58.0483	52.2319	25.5215	26.3654	-137.937	-77.6815	294.499	0.218398	0.816344	27.0113	0.70383
451	Central American montane forests	3	7	7	11	0.192	0.005	2.31188	17.857	125.429	1742.34	75.2545	1648.36	28.2165	56.0007	84.4729	29.533	34.858	-160.146	-89.2439	1641.99	0.672257	2.38046	58.8107	1.21862
452	Chiapas montane forests	2	8	8	8	0.181	0.003	2.7185	20.3145	172.228	2034.88	66.7151	1290.96	27.8626	58.0327	65.0142	30.0301	32.6022	-175.278	-75.4444	1283.88	0.489723	3.71967	84.6629	1.47949
453	Chimalapas montane forests	2	5	5	3	0.135	0.002	0.415303	22.0618	146.258	926.171	75.8325	1075.72	25.6162	55.9436	74.7752	22.9812	20.0471	-157.429	-106.143	1072.22	0.379784	4.69052	33.2477	1.79724
454	Choc?Dari? moist forests	1	5	4	9	0.148	0.002	3.12715	26.0966	31.2347	4480.16	34.8202	153.344	26.8261	51.6386	82.0182	26.7465	19.635	-81.318	190.447	153.738	0.144838	0.644787	120.463	2.02033
455	Cocos Island moist forests	0	0	1	0	0.016	0	-9999	24.356	90.9143	2937.12	72.1016	228	30.6425	56.1875	151.335	26.2625	-9999	-9999	-9999	216.236	0.384516	1.02195	119.488	6.12841
456	Cordillera La Costa montane forests	3	5	8	6	0.169	0.002	1.78223	22.4128	67.3202	1155.99	57.2139	764.705	25.7324	57.7348	62.9324	23.0196	32.0277	-145.089	-79.5909	763.663	0.573914	1.57357	47.1856	3.14764
457	Cordillera Oriental montane forests	1	9	9	11	0.194	0.002	3.39028	19.3124	51.0699	1989.26	50.9214	1499.11	28.5482	54.2663	105.526	29.5082	24.5174	-155.82	-74.1907	1498.47	0.705993	2.08821	100.255	3.31726
458	Costa Rican seasonal moist forests	4	7	10	11	0.214	0.005	2.22403	23.7476	75.4242	2151.61	81.5545	583.308	28.0005	57.873	82.1157	30.2529	45.0929	-115	-92.3548	580.61	0.317839	1.10788	80.5978	2.34516
459	Cuban moist forests	3	7	8	3	0.16	0.003	2.57867	24.1942	183.084	1452.38	55.898	251.042	28.3385	64.0414	67.2927	31.9484	40.0104	-151.606	-78.6818	249.005	0.244575	1.02627	20.7552	0.490776
460	Eastern Cordillera Real montane forests	4	11	10	21	0.249	0.006	3.67828	18.325	38.5735	1706.52	40.1382	1741.96	28.3149	54.9831	94.623	30.7646	22.8875	-154.486	-54.2605	1743.06	0.588379	2.34176	61.9771	1.66216
461	Eastern Panamanian montane forests	1	1	1	4	0.073	0.002	1.12957	23.1434	37.3807	2688.26	53.415	701.841	28.6051	52.4353	90.3215	32.7476	17.8161	-126.5	-100	694.006	0.556289	1.1386	110.008	2.76871
462	Fernando de Noronha-Atol das Rocas moist forests	0	0	0	0	-9999	-9999	-9999	26.5653	45.8178	1427.83	91.3093	57.7222	26.1107	60.7714	101.861	24.1714	-9999	-9999	-9999	62.5443	0.103016	0.515964	5.28387	0.203959
463	Guianan freshwater swamp forests	0	0	1	0	0.016	0	-9999	26.9048	60.8351	2100.15	42.8971	11.7287	24.191	47.2394	63.5659	21.3631	17.9563	-23.7727	-94.3636	11.7276	0.013636	0.480407	30.1274	1.54437
464	Guianan Highlands moist forests	2	6	6	8	0.151	0.002	3.51191	24.4183	45.8749	2413.15	53.7641	618.124	24.6213	48.771	45.8552	16.8475	4.05354	-177.033	-77.7589	617.874	0.226773	0.919291	46.6551	1.72096
465	Guianan lowland moist forests	1	5	7	6	0.143	0.002	2.48155	25.9311	58.0691	2192.33	52.0402	169.133	21.9145	47.3379	26.6523	13.5096	8.46985	-105.555	-91.6805	169.09	0.058611	0.555664	32.4481	1.42042
466	Guianan piedmont moist forests	1	5	3	4	0.109	0.001	3.25782	26.0958	50.8591	2404.79	55.6502	281.78	22.6994	49.4896	33.51	15.5425	4.64579	-123.514	-54.5316	282.336	0.105176	0.739611	35.7725	1.29309
467	Gurupa v?zea	0	0	0	0	-9999	-9999	-9999	26.5476	59.5943	1803.28	66.2285	12.1924	24.536	49.7192	31.608	17.4957	11.6364	-21.0667	-123.333	12.224	0.020622	0.548199	8.35446	0.256476
468	Hispaniolan moist forests	2	8	9	5	0.183	0.002	1.83788	24.699	124.591	1549.73	46.2394	295.234	26.7342	62.0382	67.3945	27.5659	40.3232	-127.053	-65.651	294.517	0.286114	1.29559	24.383	0.797615
469	Iquitos v?zea	0	4	3	5	0.099	0.001	2.81239	26.2427	44.8481	2313.26	31.8956	150.981	24.1498	45.3863	62.0121	16.4746	10.0323	-136.601	-85.3988	151.008	0.018403	0.47908	4.54483	0.151356
470	Isthmian-Atlantic moist forests	2	7	7	13	0.207	0.004	1.88542	25.5044	69.3037	2915.78	50.6053	181.576	26.1465	55.5675	53.5643	25.4211	31.3365	-100.365	28.8146	181.904	0.161201	0.748307	69.3883	2.03182
471	Isthmian-Pacific moist forests	3	8	8	10	0.201	0.004	2.06391	25.0278	67.8238	2809.37	67.3369	322.879	26.9821	56.3048	68.3701	28.0663	40.1597	-107.256	13.2791	321.483	0.270475	1.06593	99.0236	2.56116
472	Jamaican moist forests	2	4	7	6	0.155	0.002	0.927781	23.7356	102.918	1827.19	44.2327	378.019	29.4305	58.1934	53.8831	29.1638	44.3341	-115.269	-73.6538	377.538	0.365539	1.15814	47.9113	0.747271
473	Japur?Solim?s-Negro moist forests	0	2	2	3	0.071	0.001	0.782985	26.2069	37.491	2900.11	26.499	85.9506	20.8761	42.551	30.4166	13.5452	3.94179	-130.546	32.8471	85.9461	0.017576	0.455544	6.25873	0.169924
474	Juru?Purus moist forests	0	3	2	4	0.082	0.001	2.10992	26.0858	36.9091	2563.32	41.4405	108.044	22.6859	41.0748	22.7858	13.7213	3.43937	-148.424	-85.9566	108.028	0.016025	0.446338	3.17671	0.118839
475	Leeward Islands moist forests	0	2	2	1	0.066	0.001	-0.978834	24.7433	117.139	1515.46	33.9831	309.244	30.7769	56.6217	72.5777	34.9149	51.1106	-60	-71.6667	289.688	0.430828	1.57097	17.0213	0.779221
476	Madeira-Tapaj? moist forests	1	3	5	5	0.1	0.001	4.12326	25.8432	55.3179	2024.55	64.3937	166.677	20.4413	44.4916	16.5104	10.1081	9.18177	-132.135	-97.8368	166.679	0.044057	0.553669	3.7229	0.13352
477	Magdalena Valley montane forests	4	10	7	13	0.207	0.003	3.83204	19.023	34.4326	2081.56	40.9799	1660.06	28.7006	54.0532	98.1675	31.3787	31.0454	-145.007	-92.2776	1659.43	0.591761	1.73015	79.9813	3.19602
478	Magdalena-Urab?moist forests	0	1	4	1	0.073	0.001	-0.153014	27.6466	38.8045	2239.95	57.4847	86.7183	25.0873	57.3949	54.5285	26.4971	36.3469	-54.7489	-94.2078	87.3025	0.063169	0.593292	78.6904	2.3031
479	Mara憎n dry forests	1	2	3	5	0.095	0.001	2.06885	19.192	46.0881	888.101	43.6127	1662.53	25.1214	61.7872	50.3266	25.632	27.2979	-134.694	-108.414	1664.7	0.723353	3.56338	50.0282	1.94799
480	Maraj?v?zea	0	3	1	1	0.061	0.001	0.280103	26.5917	61.1466	2548.09	63.6268	14.5558	25.6098	48.7801	56.2263	20.0125	13.6254	-10.1521	-56.3726	14.5025	0.018289	0.550125	8.64415	0.246529
481	Mato Grosso tropical dry forests	0	4	5	5	0.106	0.001	3.09895	25.3877	62.6401	1927.19	75.5692	311.808	17.1785	48.5399	23.389	8.68179	9.42093	-113.256	-101.198	311.806	0.05653	0.619915	5.097	0.158358
482	Monte Alegre v?zea	0	1	1	0	0.032	0	-1.37172	26.7508	43.1662	2315.65	48.7729	42.7679	23.905	43.4781	22.5628	13.6695	10.9574	-85.5178	-103.66	42.792	0.023289	0.53133	5.37862	0.166302
483	Napo moist forests	1	6	5	8	0.147	0.002	3.03771	25.6341	49.7835	2978.5	19.2134	229.912	22.945	45.4524	68.1803	16.8563	9.42839	-175.71	56.445	230.111	0.036112	0.554452	8.08811	0.166642
484	Negro-Branco moist forests	0	1	3	3	0.073	0.001	1.4969	26.6115	60.4786	2841.09	43.1538	135.332	18.7775	44.2162	31.933	10.9627	3.66498	-164.46	-40.2376	135.369	0.030346	0.534847	15.4147	0.432615
485	Northeast Brazil restingas	0	0	0	0	-9999	-9999	-9999	27.31	55.8597	1572.87	100.68	32.791	19.385	56.323	21.9333	15.9113	30.4505	19.6562	-113.906	32.6864	0.019699	0.722836	11.7228	0.4918
486	Northwest Andean montane forests	4	10	9	17	0.233	0.005	3.25691	18.7116	31.7641	2208.93	44.8365	1582.66	29.2341	55.3932	106.866	34.0807	28.2981	-154.74	-4.06061	1583.46	0.629004	1.59113	105.512	2.44749
487	Oaxacan montane forests	4	8	8	10	0.198	0.003	2.82935	18.7376	194.165	1972.11	75.7295	1477.08	28.5548	55.0581	68.4091	33.1964	34.4915	-141.286	-68.7619	1473.5	0.696564	7.93684	119.866	1.57453
488	Orinoco Delta swamp forests	0	1	2	0	0.043	0	-0.81	26.3253	54.6153	1810.57	43.9954	16.5702	27.2493	53.8018	62.9793	29.6845	13.1392	-55.4048	-104.214	16.562	0.019037	0.467867	33.4614	1.53328
489	Pantanos de Centla	0	0	2	0	0.032	0	-1.56792	26.6847	211.184	1939.87	58.1624	8.4879	27.1132	63.7599	71.6297	28.6117	38.0766	-83.7857	-87.3929	8.50405	0.016435	0.679199	9.91671	0.183376
490	Pantepui forests & shrublands	1	5	6	9	0.157	0.002	3.45073	22.8164	42.647	2490.46	57.3535	1036.07	26.8165	49.5694	73.8693	22.4274	3.02693	-181.076	-25.869	1033.52	0.336197	1.13602	51.4958	1.58628
491	Pernambuco coastal forests	0	1	4	0	0.068	0.001	-0.924169	23.7917	123.934	1527.97	62.5727	177.383	18.6726	55.2452	37.8182	12.2611	38.3083	-97.0577	-108.353	176.571	0.129902	0.852997	18.0044	0.352739
492	Pernambuco interior forests	0	3	5	0	0.089	0.001	-0.0370496	23.8022	135.282	1219.05	62.1962	253.651	17.4027	57.8211	22.3448	13.1594	36.0269	-102.182	-105.349	252.858	0.11889	0.831619	15.2637	0.422228
493	Peruvian Yungas	3	11	9	20	0.223	0.004	4.48451	14.822	69.6909	1242.12	58.596	2657	27.0321	57.0405	83.6824	29.3585	21.024	-119.513	-82.7853	2657.31	0.710056	2.55855	55.334	1.19795
494	Pet?-Veracruz moist forests	4	8	9	14	0.234	0.005	2.07997	25.1001	192.739	2367.47	64.3492	255.115	26.9122	59.9277	53.9171	28.5719	29.9302	-135.925	-69.6079	255.268	0.118433	1.35561	31.8091	0.429021
495	Puerto Rican moist forests	2	4	6	3	0.143	0.002	0.0935521	24.0964	133.591	1842.86	38.467	269.77	29.7764	56.6115	63.1466	29.9569	63.5048	-69.0435	-62.913	267.282	0.26735	1.03458	47.8147	0.784498
496	Purus v?zea	0	2	2	5	0.078	0.001	2.59347	26.2059	40.6117	2699.71	34.4911	93.5998	23.1403	42.6343	29.8391	15.2695	6.37248	-138.151	-20.0372	93.7044	0.019548	0.491708	5.26011	0.132548
497	Purus-Madeira moist forests	0	0	1	1	0.019	0	5.06932	26.3025	42.199	2213.67	53.2554	86.4978	22.8943	41.1614	17.6427	11.8308	6.83972	-113.998	-94.6916	86.4915	0.017805	0.458848	3.31043	0.127039
498	Rio Negro campinarana	0	0	2	2	0.048	0	0.607073	26.5608	48.301	2722.74	37.3524	82.1379	20.0341	45.1661	44.936	13.5753	2.45982	-115.764	15.3681	82.1525	0.018732	0.497411	10.0396	0.322151
499	Santa Marta montane forests	2	4	3	4	0.114	0.001	1.1591	17.8311	65.8957	1658.73	68.5428	1786	27.917	55.35	107.012	30.5462	26.9276	-140.2	-92	1785.21	1.05799	1.37671	82.5866	2.83595
500	Serra do Mar coastal forests	3	3	8	5	0.15	0.002	1.56965	19.3425	270.907	1573.28	46.2186	489.094	23.2003	51.5636	30.0951	17.294	35.3017	-137.447	-81.9035	485.872	0.263106	1.38854	16.7051	0.524534
501	Sierra de los Tuxtlas	2	6	5	4	0.149	0.002	1.47075	24.6375	226.938	2051.58	73.101	318.616	26.7984	58.1446	60.161	26.6073	41.0646	-172.273	-77.2727	314.833	0.175497	2.18709	41.398	0.443312
502	Sierra Madre de Chiapas moist forests	4	7	7	10	0.201	0.004	1.63223	24.6304	80.2873	2420.9	92.3496	631.339	26.359	57.3531	61.3438	27.3767	38.1474	-147.333	-84.5833	630.929	0.360667	2.51117	73.0196	0.638795
503	Solim?s-Japur?moist forests	0	2	2	5	0.078	0.001	2.59347	26.125	47.4553	3014.57	18.3934	136.504	21.7488	43.5354	57.7648	16.6934	4.2585	-169.829	64.4959	136.479	0.019287	0.493209	4.00394	0.104412
504	Southern Andean Yungas	2	4	5	4	0.113	0.001	2.80994	18.6642	358.893	746.097	89.0036	1403.72	22.8929	59.1617	33.7638	19.6174	19.7275	-161.962	-104.839	1403.53	0.302341	3.18963	12.5021	0.466094
505	Southwest Amazon moist forests	2	7	7	14	0.188	0.003	3.43409	25.3052	75.2283	2173.01	48.2731	262.814	22.8892	47.557	24.6157	15.2535	7.74776	-155.126	-86.6536	262.83	0.038863	0.54935	6.48296	0.149966
506	Talamancan montane forests	3	9	9	14	0.218	0.005	3.17537	18.5613	59.6641	3171.65	49.5785	1427.71	30.9137	53.323	108.936	40.3847	29.2597	-139.933	167.133	1421.38	0.718537	1.40407	145.559	3.47349
507	Tapaj?-Xingu moist forests	0	4	3	2	0.084	0.001	1.67523	25.6832	44.9823	2036.87	65.4268	229.992	21.858	45.748	10.9882	10.8909	5.09972	-131.984	-106.039	229.995	0.066278	0.573164	3.78492	0.139325
508	Tocantins/Pindare moist forests	0	2	2	2	0.059	0.001	1.60492	26.1737	45.1793	2064.53	75.4544	92.0916	21.1798	48.2281	12.2367	12.7334	21.5823	-42.223	-117.223	92.0818	0.044728	0.599456	5.76743	0.211706
509	Trindade-Martin Vaz Islands tropical forests	0	0	0	0	-9999	-9999	-9999	-9999	-9999	-9999	-9999	-9999	-9999	-9999	-9999	-9999	-9999	-9999	-9999	-9999	-9999	-9999	-9999	-9999
510	Trinidad and Tobago moist forest	1	1	5	1	0.097	0.001	-0.88956	26.1298	58.8147	1997.32	45.7971	93.6234	28.9103	58.3337	55.529	31.1574	44.8895	-31.5714	-87.8571	91.9936	0.1219	0.647426	68.2392	1.94461
511	Uatum?Trombetas moist forests	1	4	4	5	0.119	0.001	1.58212	26.1636	56.611	2221.37	51.5266	175.838	22.3223	45.1538	14.1317	11.9368	5.57618	-94.1576	-112.296	175.841	0.065908	0.556157	5.88063	0.21898
512	Ucayali moist forests	2	6	7	11	0.167	0.002	3.55378	25.1571	34.5649	2098.64	31.8301	574.92	24.9943	48.9074	44.0288	17.6989	12.3518	-141.782	-59.4767	575.155	0.189857	0.843854	35.8224	0.381467
513	Venezuelan Andes montane forests	4	7	6	7	0.182	0.002	1.94543	20.4922	46.9417	1361.99	54.2906	1356.52	27.0492	56.1523	89.7039	26.3685	30.3068	-140.209	-102.549	1357.19	0.694642	2.18621	76.4763	3.62506
514	Veracruz moist forests	2	6	8	2	0.165	0.002	0.761594	23.7029	370.539	1205.22	74.6577	235.915	25.7027	70.6955	64.3872	27.914	36.4411	-168.807	-100.261	235.496	0.106881	2.76738	20.9338	0.428201
515	Veracruz montane forests	3	5	4	1	0.112	0.001	2.00804	19.3416	249.573	1703.9	76.353	1223.61	27.0688	59.163	62.0237	28.7676	37.7761	-163.375	-83.1875	1223.27	0.444631	10.1048	98.1229	1.32212
516	Western Ecuador moist forests	2	3	4	4	0.114	0.002	1.60313	24.7937	66.5717	1933.22	84.4843	131.053	24.9968	55.5392	47.7933	23.7438	32.3349	-146.434	-71.398	131.748	0.092707	0.78983	17.5547	0.629075
517	Windward Islands moist forests	0	1	3	0	0.055	0	-0.282132	25.0785	93.6209	1999.43	38.5208	307.423	31.6351	54.8362	78.2738	37.9514	49.0021	-51	-82.3333	303.773	0.431579	1.22216	28.0597	0.887438
518	Xingu-Tocantins-Araguaia moist forests	0	4	6	2	0.095	0.001	3.01161	25.4849	43.4732	1987.26	68.8979	202.029	21.3863	48.1061	13.4113	11.3142	9.49552	-88.586	-122.026	202.017	0.066919	0.579465	4.75079	0.174687
519	Yucat? moist forests	1	1	1	0	0.043	0	-0.793563	25.6988	187.961	1192.12	62.409	82.3145	29.0109	71.5639	62.606	39.9771	20.924	-110.991	-100.437	82.1188	0.029182	0.637502	3.41545	0.237651
520	Apure-Villavicencio dry forests	0	6	7	4	0.143	0.002	2.17843	26.8422	60.8988	2014.88	66.6845	189.099	22.7685	56.6689	53.6857	15.2504	27.7286	-68.2211	-90.2261	189.69	0.045564	0.698716	49.4948	1.55206
521	Baj? dry forests	0	2	0	5	0.042	0.001	3.66929	18.7838	261.039	745.953	111.763	1776.62	26.7612	67.573	78.1356	26.8803	37.6304	-153.195	-106.18	1777.69	0.1167	1.83913	5.80982	0.527487
522	Balsas dry forests	1	3	0	2	0.055	0.001	1.84263	24.3753	168.326	917.274	109.675	950.618	25.8426	68.1504	98.2818	24.4307	33.8395	-157.579	-113.414	953.303	0.270314	3.51398	21.2768	0.563923
523	Bolivian montane dry forests	4	5	7	11	0.185	0.003	2.71434	16.0698	218.554	620.723	91.7238	2619.64	21.1253	64.965	20.0023	18.6082	23.4509	-135.437	-113.693	2619.94	0.524988	3.51769	14.8729	1.04361
524	Brazilian Atlantic dry forests	1	2	3	0	0.072	0.001	0.0563168	23.8926	122.559	876.631	84.1989	553.04	17.8567	57.2116	13.7145	10.2506	25.5959	-100.599	-123.141	553.101	0.09501	0.681595	5.40525	0.347268
525	Caatinga	2	4	5	1	0.118	0.001	1.04441	24.5074	124.584	742.485	86.9129	414.116	15.9176	60.7117	7.74794	11.3202	26.8665	-41.4087	-109.183	414.031	0.113241	0.710453	7.57516	0.562547
526	Cauca Valley dry forests	1	3	6	3	0.111	0.001	2.36495	23.5628	35.5791	1920.28	38.7294	939.887	27.8498	59.0201	70.3851	28.6929	46.6988	-170.765	-73.9412	949.031	0.307387	0.823792	75.5427	2.86084
527	Central American dry forests	2	6	4	5	0.147	0.003	1.03391	26.0418	99.7824	1612.89	85.9399	242.976	26.0798	62.4431	86.5472	24.6411	41.5754	-57.6219	-90.7065	243.023	0.181551	1.05828	30.5638	1.07791
528	Chiapas Depression dry forests	2	5	7	5	0.169	0.003	0.276012	24.0445	160.365	1269.13	98.7366	758.061	26.2461	63.0486	110.589	23.067	39.133	-187.878	-101.707	759.368	0.204699	2.0083	26.762	0.750326
529	Chiquitano dry forests	1	2	6	4	0.101	0.001	2.6216	25.2392	170.941	1336.63	63.4348	302.948	17.3131	54.8513	15.8353	9.94201	11.7477	-132.957	-108.555	302.937	0.054727	0.684837	4.04389	0.159267
530	Cuban dry forests	2	5	5	0	0.12	0.001	-0.0336631	25.3359	191.804	1305.24	62.5588	69.8704	29.4327	68.3717	100.279	33.437	45.1421	-137.197	-76.6971	69.6787	0.051726	0.707732	6.16487	0.281757
531	Ecuadorian dry forests	2	2	3	2	0.086	0.001	1.47528	24.1951	98.4953	937.595	112.77	175.138	22.2672	61.4333	27.9722	21.4188	32.0987	-166.871	-101.659	174.765	0.135804	1.53229	16.2001	0.847111
532	Hispaniolan dry forests	2	5	6	3	0.138	0.002	1.45998	25.7345	122.994	995.313	54.9317	208.484	25.002	69.0455	65.4039	25.3475	36.5672	-110.34	-74.2083	208.336	0.251375	1.50014	27.2718	0.759316
533	Islas Revillagigedo dry forests	1	0	1	0	0.028	0	0.491409	23.7931	205.558	349.065	112.916	285.254	-9999	-9999	-9999	-9999	-9999	-104	-48	231.581	0.374579	4.02093	17.4506	2.04644
534	Jalisco dry forests	1	4	1	1	0.075	0.001	0.628985	24.1792	188.353	1047.84	113.807	538.07	25.9032	63.3406	93.8786	20.899	40.8838	-155.613	-97.8684	529.244	0.257454	2.08899	26.5158	0.571938
535	Jamaican dry forests	0	0	0	0	-9999	-9999	-9999	25.5885	99.4309	1448.02	49.6344	178.97	27.8756	62.712	68.1707	27.6861	47.324	-101.5	-91.75	176.173	0.259322	1.10129	48.3095	0.712584
536	Lara-Falc? dry forests	0	0	1	0	0.016	0	-9999	24.9934	70.5208	879.866	48.5712	327.248	24.9359	64.1554	29.7857	24.4329	32.955	-80.9231	-70.561	327.122	0.238715	0.794831	31.945	2.71751
537	Lesser Antillean dry forests	0	1	2	0	0.046	0	-1.36973	26.5292	87.2933	1811.59	40.9629	91.8204	29.81	61.0197	78.6014	35.9231	52.4361	-36.25	-89.75	92.379	0.247197	0.82183	24.5669	0.90845
538	Magdalena Valley dry forests	0	1	1	1	0.045	0	-1.1806	25.6238	47.1331	1835.42	43.7714	619.185	26.2031	58.6994	44.0599	28.3151	37.7789	-140.138	-120.828	622.929	0.3417	1.50746	58.4869	2.62336
539	Maracaibo dry forests	1	4	2	0	0.071	0.001	1.37001	26.8741	55.6398	1147.33	56.3279	183.141	24.5958	63.4206	44.6183	24.6246	33.6846	36.6023	-85.9868	183.481	0.115487	0.768435	42.0695	2.9234
540	Maranh? Baba? forests	0	0	1	0	0.016	0	-9999	26.6505	84.7405	1503.74	91.8735	126.633	17.2383	53.2332	11.7477	10.8396	28.8103	65.7245	-117.373	126.634	0.059772	0.675742	5.90566	0.275439
541	Panamanian dry forests	1	0	2	1	0.058	0	-1.38164	26.9142	67.8434	1954.64	75.5704	80.1159	26.6955	59.9809	90.8609	28.617	47.5021	-50.8095	-94.8571	80.3854	0.084386	0.721616	79.507	2.56854
542	Pat? valley dry forests	0	0	1	0	0.016	0	-9999	24.1137	44.4529	1799.63	43.4483	820.876	26.7018	59.7648	66.8211	26.1668	32.2609	-192.286	-98.5714	825.842	0.414647	1.52821	49.0773	1.41945
543	Puerto Rican dry forests	0	0	1	0	0.016	0	-9999	25.8138	128.119	1088.11	54.8084	73.2678	27.8262	67.5071	85.6361	30.3923	59.6593	-74	-46	72.7105	0.150829	0.778104	42.5313	0.884196
544	Sierra de la Laguna dry forests	1	0	0	0	0.016	0	-9999	21.7129	421.129	396.995	134.325	418.547	22.1759	76.3156	13.8073	14.4942	27.2053	-140.667	-9999	416.863	0.213499	4.99169	18.6557	0.869407
545	Sinaloan dry forests	2	4	2	3	0.091	0.001	1.22607	23.737	359.178	875.716	114.947	540.179	26.7716	67.35	94.8954	25.9349	27.5312	-160.81	-100.977	544.162	0.273462	5.43164	14.9862	0.856055
546	Sin?Valley dry forests	1	1	1	2	0.06	0.001	0.545827	27.4395	57.8368	1410.39	65.6384	170.834	25.9204	62.5794	54.2638	29.6669	36.7698	-61.0779	-94.4026	171.37	0.138705	0.685142	48.4953	2.60726
547	Southern Pacific dry forests	3	5	4	5	0.145	0.003	0.892865	25.6928	106.88	1156.43	109.952	410.608	24.264	62.7052	99.0739	16.1467	39.2075	-107.357	-96.4103	407.08	0.167057	2.50361	28.7631	0.706554
548	Trinidad and Tobago dry forest	0	0	0	0	-9999	-9999	-9999	26.3841	58.9204	1657.63	48.1588	69.8944	27.4276	60.4395	70.6248	26.0517	62.3741	-37	-119	71.5605	0.196812	0.701401	110.868	2.87576
549	Tumbes-Piura dry forests	1	1	0	0	0.032	0	-1.28288	22.6969	175.332	243.452	145.942	420.554	18.5904	69.8696	22.1545	16.7551	25.4329	-158.555	-110.8	421.834	0.177276	3.63363	15.8682	3.66594
550	Veracruz dry forests	1	0	1	0	0.027	0	0.399549	24.8984	226.468	1251.67	100.495	162.386	25.9879	62.9283	110.095	25.2653	38.1405	-134.818	-85.5909	162.158	0.055688	0.947815	15.0293	0.784187
551	Yucat? dry forests	1	0	0	0	0.016	0	-9999	25.8337	195.371	1101.12	68.2538	40.7412	27.4932	73.4003	84.3339	33.1296	27.5867	-107.219	-97.4354	40.6923	0.020379	0.620471	3.74852	0.234204
552	Bahamian pineyards	0	0	0	0	-9999	-9999	-9999	25.285	244.778	1089.96	53.0307	6.64476	31.1067	70.3434	120.124	46.5803	22.6724	-98.6842	-87.6316	6.61787	0.017111	0.608943	3.37064	0.377385
553	Central American pine-oak forests	4	9	10	11	0.215	0.004	2.86334	21.1305	125.712	1599.13	78.9517	1122.9	26.8359	59.0208	84.7703	25.8343	38.832	-163.887	-91.814	1122.76	0.427704	1.9566	47.9535	0.929151
554	Cuban pine forests	0	3	4	0	0.071	0.001	1.9267	24.6226	199.153	1478.35	53.5653	117.711	26.9263	63.7241	81.0529	28.6287	41.1617	-114.095	-80.2381	116.914	0.117881	0.722939	10.8777	0.336479
555	Hispaniolan pine forests	2	10	9	8	0.189	0.003	3.20262	19.2227	124.033	1425.14	55.4793	1170.98	28.1442	57.4117	94.0842	33.3178	31.2046	-161.364	-65.5312	1168.18	0.723619	1.90712	35.7303	0.884957
556	Sierra de la Laguna pine-oak forests	1	1	0	0	0.027	0	0.561079	18.7015	365.153	575.11	129.745	1042.24	23.5198	70.5179	30.1728	20.0385	21.099	-171	-9999	1038.03	0.478163	9.73967	32.7772	2.36409
557	Sierra Madre de Oaxaca pine-oak forests	2	9	7	9	0.184	0.003	2.79722	18.7307	155.024	1222.26	87.6822	1653.81	27.0562	58.5384	91.3207	27.6563	31.0156	-142.617	-89.5122	1652.29	0.61575	7.14759	73.4675	1.29435
558	Sierra Madre del Sur pine-oak forests	2	6	7	7	0.154	0.002	2.30272	20.8809	128.11	1141.16	103.185	1570.76	26.5012	59.3735	91.8856	23.3433	29.9352	-145.165	-100.426	1567.88	0.427919	4.28107	38.4416	0.81872
559	Trans-Mexican Volcanic Belt pine-oak forests	3	7	5	7	0.15	0.003	2.08583	16.5502	201.542	952.765	99.6899	2081.31	27.0386	61.2243	92.3043	26.6622	34.5874	-135.205	-104.064	2079.31	0.312121	3.53832	23.092	0.77721
560	Juan Fern?dez Islands temperate forests	0	0	0	0	-9999	-9999	-9999	13.8731	234.096	997.844	61.2618	253.562	31.2174	60.3287	148.952	49.5864	6	-65	-54	213.093	0.415166	1.00621	17.8125	0.326727
561	Magellanic subpolar forests	0	1	0	0	0.016	0.002	-9999	5.01782	313.188	1534.87	15.3567	431.842	33.7465	56.2272	234.551	49.7049	9.06393	-54.7794	-34.184	411.378	0.463124	1.56404	25.0467	0.48372
562	San F?ix-San Ambrosio Islands temperate forests	0	0	0	0	-9999	-9999	-9999	-9999	-9999	-9999	-9999	-9999	36.6667	63.3333	137.333	87	6	-71	-9999	219.167	0.24063	10.4064	2.42931	1.89729
563	Valdivian temperate forests	0	4	0	1	0.061	0.004	-0.0917254	8.19041	384.867	1504.55	55.6408	817.912	28.9499	56.309	135.39	42.0873	17.8088	-98.4301	-37.2402	808.7	0.499352	2.17099	39.1082	0.547427
564	Belizian pine savannas	1	0	1	0	0.028	0	0.0394665	25.306	167.49	2013.88	52.5612	149.7	27.378	61.1447	73.2311	29.7755	21.3098	-124.333	-62.6667	149.379	0.079378	0.796032	7.86373	0.273978
565	Beni savanna	1	1	3	1	0.07	0.001	0.494021	26.1157	118.717	1724.3	63.0221	159.264	20.529	52.4609	30.871	11.6974	10.5155	-96.0522	-99.2193	159.267	0.012529	0.561392	4.3264	0.177519
566	Campos Rupestres montane savanna	3	4	5	6	0.154	0.002	0.921365	18.7751	201.508	1359.4	77.8301	1113.65	21.9066	53.3915	26.8434	13.489	30.0164	-176.033	-96.6071	1113.4	0.273641	1.66655	18.8697	0.580797
567	Cerrado	3	4	7	7	0.168	0.002	1.5382	23.5855	143.045	1443.05	77.887	512.654	17.2017	53.9105	12.7223	7.95706	21.7741	-106.602	-109.466	512.652	0.081555	0.821776	5.66173	0.184082
568	Clipperton Island shrub and grasslands	0	0	0	0	-9999	-9999	-9999	-9999	-9999	-9999	-9999	-9999	-9999	-9999	-9999	-9999	-9999	-9999	-9999	1.53333	0.000393	0.022894	3.559	0.011861
569	Dry Chaco	1	2	3	1	0.079	0.001	-0.476386	22.0145	416.126	681.834	70.8041	326.115	19.771	64.6884	22.96	16.3705	14.4111	-101.571	-111.35	326.145	0.031964	0.717852	2.71088	0.250304
570	Guianan savanna	1	1	5	1	0.087	0.001	0.915277	25.949	63.0547	1890.98	66.4718	323.566	20.3346	53.2742	65.631	12.4878	11.6357	-78.8571	-107.508	323.575	0.077168	0.62738	33.0341	1.92579
571	Humid Chaco	1	1	1	0	0.035	0	1.38181	21.9532	400.214	1181.82	41.2928	81.8605	22.4816	60.4746	45.3235	19.5503	19.1017	-94.1638	-101.005	81.8639	0.012332	0.544183	2.43433	0.154038
572	Llanos	2	3	3	0	0.092	0.001	-0.523699	27.1043	86.5866	1970.87	74.3235	124.183	20.8456	55.5979	81.3298	13.3713	17.2685	-58.8216	-85.0861	124.207	0.027224	0.601372	39.6526	1.58345
573	Miskito pine forests	0	0	2	0	0.032	0	-1.40287	25.5211	102.058	2711.69	53.6472	37.6004	27.9293	56.8333	84.8353	28.5222	20.6376	-76.7193	47.8947	37.1165	0.030554	0.581061	11.2358	0.35864
574	Uruguayan savanna	2	1	3	0	0.054	0	2.74328	18.2396	438.129	1403.45	12.4544	144.11	23.4448	56.7498	36.3093	21.72	27.0188	-99.8821	-85.7176	143.799	0.044854	0.680961	2.86706	0.132789
575	Espinal	0	0	0	1	0.016	0	-9999	16.8437	543.668	736.811	48.1972	197.278	20.1856	68.4326	23.5502	20.401	23.6396	-90.0113	-111.845	197.2	0.017735	0.612535	1.78814	0.223593
576	Humid Pampas	0	0	0	0	-9999	-9999	-9999	15.7578	522.766	908.165	38.552	101.991	23.2997	69.1081	35.6461	25.0071	31.7317	-87.6484	-107.535	101.924	0.012763	0.553493	1.65095	0.184253
577	Low Monte	0	0	0	0	-9999	-9999	-9999	14.4989	599.33	267.268	35.6752	426.387	13.5453	75.4148	5.64398	12.9451	15.1311	-79.8149	-119.375	426.327	0.037887	0.815261	1.62514	0.482332
578	Patagonian steppe	0	1	0	0	0.016	0.002	-9999	8.78908	490.737	273.992	33.2051	643.521	17.1573	73.745	25.3795	23.0938	11.0964	-71.0832	-88.6829	642.219	0.123423	1.00846	3.5409	0.624502
579	Cuban wetlands	0	0	0	0	-9999	-9999	-9999	25.4208	203.762	1269.98	68.5157	6.93349	31.2787	69.7839	129.514	44.8627	30.8055	-133.167	-85	6.98787	0.016112	0.728436	4.06532	0.218088
580	Enriquillo wetlands	0	0	0	0	-9999	-9999	-9999	27.2701	123.023	729.945	62.212	9.37887	26.1678	73.5903	92.1688	26.6462	23.7961	-48	-9999	12.5213	0.128366	1.18664	25.2106	0.498373
581	Everglades flooded grasslands	0	0	4	0	0.059	0.001	-1.74424	23.6442	357.985	1369.38	58.1801	6.93713	28.8887	65.9011	210.899	40.5681	28.6294	-152.629	-87.1286	6.93861	0.014636	0.76622	2.74548	0.233732
582	Guayaquil flooded grasslands	0	1	1	0	0.032	0	-1.37172	25.226	100.856	1363.35	115.402	13.6808	26.2276	59.9117	38.7871	27.6219	35.7783	-71.375	-121.125	13.9531	0.022735	0.66981	12.9018	0.288062
583	Orinoco wetlands	0	0	0	0	-9999	-9999	-9999	26.5906	58.9309	1496.99	50.3991	8.40401	26.5658	58.7247	51.4544	26.0575	21.6767	-49.0588	-93.7647	8.43811	0.013315	0.498719	27.8121	1.52321
584	Pantanal	0	0	1	0	0.016	0	-9999	25.6979	214.519	1289.93	62.76	132.867	16.2174	58.0765	25.3589	10.3105	11.2978	-46.9846	-112.509	132.895	0.019655	0.588615	3.1269	0.137623
585	Paran?flooded savanna	0	0	0	0	-9999	-9999	-9999	18.9828	462.199	1058.93	37.1679	21.6822	26.3124	62.1335	54.6261	29.063	24.1334	-91.7244	-109.551	21.7196	0.011051	0.618088	3.12461	0.30177
586	Southern Cone Mesopotamian savanna	1	0	1	0	0.028	0	0.0138189	20.5655	426.164	1558.68	20.6136	83.6801	22.848	56.7995	42.0113	19.6603	21.6024	-88.3483	-81.4494	83.6804	0.019822	0.624675	2.33944	0.127593
587	Central Andean dry puna	0	1	2	0	0.035	0	1.39481	6.82013	300.226	165.136	122.043	4003.84	16.2516	74.952	4.48981	13.8517	12.164	-99.6125	-111.455	4003.72	0.23891	1.35595	2.39302	1.24743
588	Central Andean puna	0	3	3	4	0.082	0.001	2.1198	7.62276	261.011	395.303	105.716	3952.87	18.712	69.7362	10.5875	17.2152	16.2274	-104.429	-112.181	3952.6	0.380484	2.05137	6.45381	0.87858
589	Central Andean wet puna	2	7	5	8	0.158	0.003	2.10881	6.14423	133.016	839.172	81.0863	4248.07	24.523	61.2967	61.5604	26.9262	26.3723	-94.0771	-112.578	4247.18	0.469271	2.36393	18.116	0.717657
590	Cordillera Central p?amo	0	3	0	1	0.05	0	0.339913	9.7948	47.3579	1049.15	55.893	3633.44	28.3627	57.1755	118.277	36.4819	23.0938	-79.6486	-100.686	3626.01	0.59267	2.78735	37.9279	1.08178
591	Cordillera de Merida p?amo	0	1	1	1	0.034	0	1.46153	8.4635	44.546	956.341	63.6985	3535.35	28.8518	57.7607	206.861	34.9906	28.7276	-146.667	-95.1111	3512.2	1.04344	1.49643	52.872	2.73247
592	High Monte	0	0	0	0	-9999	-9999	-9999	14.1566	489.266	208.634	90.815	1825.77	14.0789	75.7347	3.1072	11.1201	12.6593	-151.641	-120.75	1825.99	0.287661	4.51831	3.55193	0.958993
593	Northern Andean p?amo	3	10	5	11	0.2	0.004	2.10917	7.37173	43.197	1181.12	38.2913	3645.29	31.4739	56.4579	187.785	43.1574	26.5577	-96.1579	-108.379	3630.6	0.656466	1.44014	54.6053	2.81917
594	Santa Marta p?amo	0	1	0	0	0.016	0	-9999	6.57656	70.7868	1859.6	71.7755	3792.99	27.8352	58.3264	173.588	36.3795	21.7429	-95.3333	-102.833	3783.46	1.13079	1.19752	65.6061	1.69115
595	Southern Andean steppe	0	0	0	0	-9999	-9999	-9999	2.52644	371.787	245.294	64.3254	3471.36	18.7915	73.7745	15.8094	20.9926	13.1894	-128.271	-115.9	3471.08	0.650531	3.2497	6.50983	1.61037
596	Chilean Matorral	0	1	0	1	0.03	0.003	-0.59671	12.843	331.95	418.46	88.0526	666.829	19.0338	72.7873	31.2414	25.2891	26.2977	-121.394	-84.709	665.717	0.277749	2.11311	5.33517	1.62319
597	Araya and Paria xeric scrub	0	0	0	0	-9999	-9999	-9999	25.8101	71.162	1088.81	54.6187	182.595	24.915	64.4489	52.8913	24.5023	40.5338	-57.3889	-78.3125	179.967	0.32964	0.814257	47.8851	2.80894
598	Atacama desert	0	0	0	0	-9999	-9999	-9999	14.817	237.881	10.3473	60.4111	1647.42	12.3308	84.1061	0.856144	15.4956	15.6199	-160.078	-95.9801	1647.06	0.14006	1.34148	0.637433	2.28564
599	Caribbean shrublands	1	0	1	0	0.028	0	-0.122793	26.6096	99.9504	1300.17	42.6332	75.4083	28.2371	64.4757	93.2254	29.9999	57.8154	-40.1667	-61.9091	74.5351	0.167059	0.812648	19.5029	1.09866
600	Cuban cactus scrub	0	0	3	0	0.044	0	-0.921818	25.5583	163.807	1221.95	52.584	94.1598	26.5541	69.7589	60.756	29.0475	41.4071	-99.4	-88.3333	93.8629	0.20176	0.923032	20.3884	0.697827
601	Gal?agos Islands xeric scrub	1	1	4	1	0.086	0.001	-0.840526	23.1438	147.789	316.2	82.9029	263.776	27.8683	63.3252	68.1219	35.853	-9999	-148.333	-56.5882	259.037	0.237962	1.1311	10.4669	2.05158
602	Guajira-Barranquilla xeric scrub	0	1	2	1	0.055	0	-0.935982	28.0167	73.9869	915.698	76.2642	96.0789	24.5992	67.4555	45.9374	27.1751	37.3538	-39.1809	-79.0508	95.189	0.093809	0.647411	34.9214	3.63635
603	La Costa xeric shrublands	2	3	6	4	0.13	0.002	0.786562	25.527	61.5243	1111.93	72.5272	282.089	24.1397	60.9197	83.0298	19.3133	30.9012	-62.99	-78.5608	282.105	0.174153	0.809252	34.3035	2.35085
604	Malpelo Island xeric scrub	0	0	0	0	-9999	-9999	-9999	-9999	-9999	-9999	-9999	-9999	-9999	-9999	-9999	-9999	-9999	-9999	-9999	-9999	-9999	-9999	-9999	-9999
605	Motagua Valley thornscrub	0	0	1	0	0.016	0	-9999	24.5642	119.805	1308.08	89.3126	648.619	25.9837	63.4401	102.405	24.0591	47.4807	-184	-97.75	653.933	0.608752	2.01482	82.5357	2.10889
606	Paraguan?xeric scrub	1	0	0	0	0.016	0	-9999	26.0201	79.5192	715.666	62.684	349.499	23.0383	71.0953	28.2518	24.6835	30.7732	2.17021	-72	347.162	0.181384	0.85731	40.406	3.66449
607	San Lucan xeric scrub	0	0	0	0	-9999	-9999	-9999	22.7361	437.797	287.188	130.432	163.288	22.44	78.2335	8.75004	11.1463	30.1373	-133	-9999	158.775	0.092647	2.06839	10.0931	0.797485
608	Sechura desert	0	3	0	3	0.065	0.001	0.821551	15.1918	162.042	183.55	102.49	1850.32	15.7399	76.4044	8.75159	16.9566	22.2164	-139.101	-103.667	1841.88	0.415784	3.70704	13.7461	4.07029
609	St. Peter and St. Paul Rocks	0	0	0	0	-9999	-9999	-9999	-9999	-9999	-9999	-9999	-9999	-9999	-9999	-9999	-9999	-9999	-9999	-9999	-9999	-9999	-9999	-9999	-9999
610	Tehuac? Valley matorral	0	2	2	3	0.044	0.001	3.25404	16.1086	187.913	539.482	85.4325	2139.84	24.6736	70.3432	96.7101	22.6487	33.3627	-129.467	-90.8667	2140.27	0.235775	3.19403	14.0378	0.847445
611	Amazon-Orinoco-Southern Caribbean mangroves	0	2	1	1	0.035	0	4.11294	26.8662	51.7555	1841.27	65.8017	13.9974	26.1496	55.0855	56.4795	25.5973	29.0614	-16.8636	-67.7143	13.7923	0.024626	0.59716	29.6134	1.51423
612	Bahamian-Antillean mangroves	0	1	1	0	0.028	0	0.131771	25.2589	232.923	1221.05	57.3758	13.247	33.4405	68.9716	136.017	54.2931	26.5018	-102.435	-80.1833	13.2896	0.038282	0.680634	7.21571	0.481334
613	Mesoamerican Gulf-Caribbean mangroves	1	1	3	0	0.07	0.001	-1.66855	25.9483	178.446	1747.14	61.7733	7.28411	28.4746	67.7303	92.9737	32.2486	29.4896	-97.3951	-83.2405	7.17459	0.022673	0.684766	13.0955	0.438102
614	Northern Mesoamerican Pacific mangroves	0	0	0	0	-9999	-9999	-9999	24.2581	350.426	651.902	112.134	4.64532	25.9307	74.6097	78.9314	26.1362	29.5788	-113.739	-94.8182	5.00267	0.052155	1.75167	3.08273	0.379238
615	South American Pacific mangroves	1	1	1	0	0.045	0	-1.12712	25.7624	63.3863	2774.81	67.3327	27.5917	27.3226	56.362	86.5362	27.2398	30.6909	-84.9355	82.1071	27.3834	0.048913	0.728286	80.1548	1.67768
616	Southern Atlantic Brazilian mangroves	1	1	4	1	0.078	0.001	0.0582733	23.7562	183.865	1663.78	49.0112	26.6025	22.0421	54.4137	48.4432	21.1549	43.2	-69.7241	-90.8929	26.4422	0.073789	0.781983	11.9495	0.357656
617	Southern Mesoamerican Pacific mangroves	0	3	1	1	0.057	0	0.900139	27.3854	77.4411	1941.84	91.9363	17.7919	27.5391	62.6993	93.6245	27.3265	36.8889	86.36	-69.44	17.5131	0.047448	0.885577	42.0218	1.11278
618	Carolines tropical moist forests	0	3	1	2	0.05	0.001	2.01035	26.8079	12.7679	4578.29	15.5245	137.266	31.7941	55.2254	107.049	32.1457	24.8188	-4	330	130.504	0.258581	0.706275	17.7563	0.145855
619	Central Polynesian tropical moist forests	0	0	0	0	-9999	-9999	-9999	29.1029	19.7608	1075.41	52.1755	3.66667	29.8969	69.6907	123.397	37.3891	4.8	-9999	-9999	4.51801	0.018171	0.372637	93.351	1.28193
620	Cook Islands tropical moist forests	0	1	0	1	0.03	0	-0.369936	24.0914	161.253	1991.07	33.7391	80.1726	28.9652	54.9297	87.1783	30.229	28.92	-71.5	20	65.9675	0.13891	0.750779	48.8167	0.913113
621	Eastern Micronesia tropical moist forests	0	0	0	0	-9999	-9999	-9999	27.3153	33.4611	2154.09	25.6451	6.21395	38.6842	63.6233	206.135	64.281	21	24.5	-94.5	5.68318	0.032683	0.374315	2.80736	0.075844
622	Fiji tropical moist forests	0	4	3	7	0.091	0.003	1.96918	24.1761	143.72	2823.64	34.6127	240.636	29.3285	51.5652	72.9701	29.2261	21.7094	-60.4839	2.51613	232.338	0.241788	1.08287	83.3968	1.43095
623	Hawai'i tropical moist forests	1	6	5	9	0.139	0.007	2.44262	19.3414	124.641	2307.65	44.7345	673.022	36.0835	52.9021	151.646	60.1717	32.6808	-88.4762	68.8421	668.206	0.45564	1.67467	209.588	5.62142
624	Kermadec Islands subtropical moist forests	0	4	1	1	0.039	0.001	3.05835	20.961	216.301	1837	18.7985	188.722	32.313	55.3939	103.935	50.9424	-9999	-62	26	182.352	0.435505	0.772395	21.9569	1.4951
625	Marquesas tropical moist forests	1	4	1	4	0.077	0.002	1.95606	24.8934	56.7449	1702.92	25.3833	360.934	28.2546	56.4026	87.5735	26.5411	9.4859	-2.16667	-4.83333	341.36	0.554213	0.817679	142.681	2.78482
626	Ogasawara subtropical moist forests	0	3	0	3	0.063	0.003	0.970781	23.4643	337.634	1325.19	31.1235	109.949	33.0999	59.0954	137.669	44.6401	-9999	-9999	-9999	110.445	0.249724	1.13612	16.5717	0.25742
627	Palau tropical moist forests	0	1	2	0	0.039	0	0.0446967	26.1279	53.4561	3435.98	25.0407	59.6866	31.0792	52.1641	89.3997	26.2592	31.6198	-29.3333	330	54.1111	0.081906	0.771061	9.29368	0.106742
628	Rapa Nui and Sala y G?ez subtropical forests	0	1	0	0	0.016	0	-9999	20.3963	208.491	1189.77	27.5253	142.57	28.1383	58.3182	117.381	35.549	-9999	-9999	-9999	137.208	0.209601	0.878657	13.3327	0.273608
629	Samoan tropical moist forests	1	6	1	5	0.088	0.003	2.46815	24.3817	58.6318	3488.39	40.8791	386.27	26.9881	53.403	75.0212	30.2113	24.7181	-26	252.5	367.84	0.325286	0.92666	132.357	3.16774
630	Society Islands tropical moist forests	0	4	2	3	0.071	0.001	2.03484	23.3105	122.661	1933.41	33.1712	339.169	28.0493	56.2434	74.2857	25.617	26.9772	-115.25	173.5	322.831	0.529078	1.12881	57.6829	1.95588
631	Tongan tropical moist forests	0	3	1	3	0.057	0.002	2.42558	24.4033	154.707	2069.36	32.32	62.8185	28.8082	53.7595	109.086	32.3728	28.9697	-27.3333	25	60.1029	0.094907	0.691555	35.5833	0.923848
632	Tuamotu tropical moist forests	0	3	1	0	0.04	0.001	1.66577	25.3005	126.886	1525.63	30.7894	16.5896	31.6912	56.7346	101.531	41.0015	2.625	9.66667	-35.6667	10.0812	0.0234	0.343184	7.69048	0.3614
633	Tubuai tropical moist forests	1	3	0	1	0.053	0.001	1.08925	21.5596	208.804	1603.8	25.0715	97.8947	28.606	54.4282	85.9869	30.1935	-9999	-9999	-9999	86.3794	0.218161	0.610092	24.2795	0.914087
634	Western Polynesian tropical moist forests	0	0	0	0	-9999	-9999	-9999	28.0613	16.5691	1465.33	35.6639	3.93478	38.3212	63.9192	201.481	62.8519	0	-9999	-9999	4.41298	0.011288	0.261465	24.3902	1.40331
635	Fiji tropical dry forests	0	1	0	7	0.057	0.003	3.04246	24.7984	133.668	2355.23	48.0151	191.291	27.7273	53.4544	64.3908	27.9992	33.4454	-66.3333	-18.6111	189.921	0.219751	1.17662	73.3545	1.40464
636	Hawai'i tropical dry forests	1	4	6	4	0.113	0.002	1.67649	19.4505	138.199	1445.23	46.5683	817.702	31.8932	61.2931	90.0157	54.4617	29.8446	-82.6667	-4.33333	814.678	0.387159	1.95265	128.125	6.30544
637	Marianas tropical dry forests	0	1	0	0	0.016	0	-9999	26.6833	69.3236	2142.34	53.2197	125.003	29.7893	63.0088	75.1331	30.984	67.4993	-20	-31.6667	123.62	0.178324	1.09014	12.1263	0.281822
638	Yap tropical dry forests	0	0	0	0	-9999	-9999	-9999	27.3727	22.9337	2783.39	35.7247	31.463	31.3301	54.5158	87.497	35.4982	-9999	-9999	-9999	30.3695	0.062424	0.582494	6.09344	0.105312
639	Hawai'i tropical high shrublands	0	1	4	1	0.071	0.001	-0.445049	10.3384	138.34	934.428	44.4348	2660.13	31.735	63.6481	135.932	69.6003	11.713	-11.8	-8.6	2653.06	0.411764	1.48193	69.8057	4.50189
640	Hawai'i tropical low shrublands	0	1	0	0	0.016	0	-9999	23.8016	150.406	1002.49	43.5091	135.098	27.5046	65.929	57.5915	36.5805	42.7894	-95.8	-9	136.735	0.218877	1.85842	101.274	6.47463
641	Northwest Hawai'i scrub	0	0	0	0	-9999	-9999	-9999	22.8958	272.806	1281.62	35.8846	7.125	33.8125	69.6429	176.652	59.6429	-9999	-9999	-9999	5.33077	0.12348	2.03975	3.67676	0.570081
642	Guizhou Plateau broadleaf and mixed forests	2	8	15	5	0.21	0.009	1.71584	14.8433	741.92	1223.14	64.5197	924.14	26.6036	61.3891	122.143	21.724	28.9794	-165.535	-104.961	924.142	0.302723	2.24899	6.76233	0.233406
643	Yunnan Plateau subtropical evergreen forests	2	9	14	3	0.201	0.01	1.59079	15.2012	483.573	996.983	83.6334	1830.01	27.2533	61.2803	112.942	25.4569	28.3574	-147.619	-109.605	1829.97	0.4031	2.31865	7.11378	0.351082
644	Appenine deciduous montane forests	2	2	6	0	0.09	0.001	1.68165	9.42099	649.197	1027.71	25.0512	1031.65	28.8054	64.3875	125.181	32.5852	31.2233	-164.738	-94.7255	1030.48	0.504035	4.59669	33.0766	0.588228
645	Azores temperate mixed forests	3	2	4	0	0.087	0.003	1.23724	16.5513	300.027	1219.67	36.9721	362.402	30.786	61.2818	124.293	40.4592	38.1859	-49.1818	-36.0909	330.907	0.300148	1.70631	38.5897	0.542403
646	Balkan mixed forests	1	1	5	0	0.08	0.001	-0.206692	10.7206	785.452	629.76	23.5368	398.415	26.2506	67.2442	63.2314	29.1483	39.9157	-162.206	-115.732	398.131	0.170318	3.47765	4.9971	0.286168
647	Baltic mixed forests	1	0	3	0	0.051	0	-0.375173	8.06549	663.812	629.711	23.9369	61.4661	20.5322	58.0212	144.73	31.3419	43.8636	-143.301	-125.915	60.3537	0.026409	0.981518	3.28611	0.223773
648	Cantabrian mixed forests	5	2	7	2	0.137	0.004	0.966695	12.0288	469.775	1195.36	35.1324	486.146	24.7493	58.1278	98.9554	26.2397	39.0694	-159.081	-95.9675	482.91	0.236658	3.92012	17.1953	0.271508
649	Caspian Hyrcanian mixed forests	1	0	4	0	0.055	0.001	1.01289	12.682	804.2	512.776	51.6623	1013.72	25.4132	71.4334	62.5835	26.1902	34.7167	-159.619	-106.265	1013.75	0.272841	4.50282	13.3958	0.898212
650	Caucasus mixed forests	2	1	5	0	0.085	0.001	0.457902	6.0225	778.123	856.535	35.7386	1637.79	29.4899	61.1903	129.255	35.7828	27.9601	-157.059	-101.617	1635.71	0.485351	7.1969	19.3454	0.825558
651	Celtic broadleaf forests	2	1	6	0	0.108	0.002	-1.64915	8.92254	415.637	1070.57	21.0687	141.24	27.9603	57.3102	162.656	31.0628	43.1295	-136.061	-89.3118	139.774	0.097029	1.24243	32.8525	0.283467
652	Central Anatolian steppe and woodlands	0	0	0	0	-9999	-9999	-9999	9.99636	792.887	433.041	48.3407	1231.42	23.2865	75.0997	23.6717	22.1268	35.374	-165.863	-144.133	1231.48	0.153845	1.62234	3.48525	0.346553
653	Central China Loess Plateau mixed forests	3	3	4	0	0.092	0.003	1.15023	8.36663	1073.94	508.942	104.816	980.224	21.4739	75.0804	63.697	18.8689	33.5831	-166.012	-111.33	980.224	0.197706	2.76847	3.52568	0.458261
654	Central European mixed forests	1	2	6	0	0.09	0.001	0.887556	7.52032	808.026	594.882	35.1199	170.372	22.8832	59.2388	118.653	32.517	39.2109	-151.383	-131.848	170.289	0.033112	1.13503	2.23852	0.238729
655	Central Korean deciduous forests	2	1	3	0	0.068	0.001	0.0899796	10.7392	985.165	1206.24	87.2699	235.401	25.5213	58.561	127.667	24.4319	39.8757	-169.739	-102.102	233.804	0.19576	1.82697	10.0479	0.356878
656	Changbai Mountains mixed forests	0	0	2	0	0.03	0	-0.546464	2.72632	1253.9	822.248	98.0164	909.742	32.5218	56.108	148.535	47.1789	27.2277	-152.62	-111.094	909.615	0.279771	2.85243	8.75493	0.536604
657	Changjiang Plain evergreen forests	2	5	11	3	0.153	0.007	1.99478	16.1012	883.133	1255.52	56.4663	115.787	24.6069	64.3686	120.659	17.6736	35.0796	-177.746	-91.587	115.731	0.094855	1.62923	7.61803	0.211594
658	Crimean Submediterranean forest complex	1	1	6	0	0.096	0.001	-1.17583	10.4401	775.793	886.239	23.9327	381.427	28.4136	63.5355	99.2754	33.0991	33.715	-148.079	-102.266	378.19	0.178269	2.47199	9.40138	0.433348
659	Daba Mountains evergreen forests	2	3	10	1	0.137	0.003	1.07306	14.2693	795.158	1072.98	69.8876	792.034	25.943	64.7248	124.557	22.8068	30.3244	-162.972	-99.0251	792.037	0.358432	3.90763	6.60062	0.425472
660	Dinaric Mountains mixed forests	4	1	6	0	0.113	0.004	-0.185633	7.65262	685.771	1206.63	19.6581	975.231	30.7953	60.2548	150.733	37.2833	32.6386	-159.858	-94.4871	974.547	0.450999	6.44751	20.0005	0.439852
661	East European forest steppe	1	0	3	0	0.051	0	-0.375173	5.09949	1095.65	549.345	29.6308	177.669	32.1916	63.2825	150.039	40.2858	35.9536	-155.896	-136.98	177.666	0.036619	1.74492	1.92913	0.254616
662	Eastern Anatolian deciduous forests	0	0	0	0	-9999	-9999	-9999	10.5747	945.132	619.789	60.7555	1439.67	25.1569	71.7264	56.5826	26.3552	33.2632	-161.605	-116.5	1439.66	0.299628	3.20107	10.3344	0.36089
663	English Lowlands beech forests	1	1	4	0	0.077	0.001	-1.19622	9.88516	466.641	714.359	18.47	78.3088	25.3012	63.7326	67.9767	26.1597	53.8936	-124.176	-114.299	77.5021	0.053982	0.895581	10.5818	0.243406
664	European Atlantic mixed forests	4	1	5	0	0.108	0.002	-0.436495	10.3762	548.568	771.144	17.6569	82.7318	21.866	62.4285	80.0164	23.6057	45.2831	-155.358	-111.569	82.2792	0.037989	0.865102	4.38054	0.194475
665	Euxine-Colchic broadleaf forests	1	0	4	0	0.054	0.001	1.4802	11.1402	663.873	817.126	29.7441	634.444	27.8684	63.2601	108.139	30.74	34.1186	-157.874	-99.8962	630.255	0.325097	3.04982	13.8212	0.67688
666	Hokkaido deciduous forests	3	0	3	0	0.075	0.001	-1.29174	5.14161	950.543	1083.32	33.8922	187.736	31.476	51.9211	190.211	36.4657	38.0545	-152.056	-92.3506	183.276	0.148933	3.13069	8.20588	0.277755
667	Huang He Plain mixed forests	2	4	6	2	0.116	0.003	2.1651	13.3707	1011.22	661.752	100.25	147.884	21.4471	77.0377	67.6824	16.611	41.3229	-171.529	-103.012	147.729	0.049655	1.16644	2.38843	0.292653
668	Madeira evergreen forests	4	4	3	0	0.092	0.006	2.63322	15.3676	259.06	698.533	61.7379	677.765	31.9453	55.1346	147.808	38.5312	49.7204	-89	-50.3333	647.769	0.642911	4.13266	26.0244	1.27318
669	Manchurian mixed forests	3	0	5	0	0.086	0.001	-0.42836	1.93694	1456.01	648.715	99.5795	383.094	30.1617	58.7248	113.194	38.5321	24.589	-159.783	-115.709	382.776	0.126344	2.88026	4.02733	0.431587
670	Nihonkai evergreen forests	4	2	8	0	0.107	0.002	1.86228	12.8678	851.75	1927.03	27.9012	216.908	31.7317	52.6142	220.49	33.3946	50.3315	-148.553	-45.5921	214.185	0.224769	2.11922	13.6398	0.718513
671	Nihonkai montane deciduous forests	4	3	9	0	0.133	0.003	0.811868	9.19796	906.447	1595.76	31.9289	526.188	34.9631	51.1467	262.582	41.3744	38.6092	-166.32	-68.0948	523.554	0.291081	2.36579	18.7181	0.813492
672	North Atlantic moist mixed forests	2	1	5	0	0.097	0.001	-1.38372	8.4919	360.05	1565.11	28.0746	145.714	28.5747	51.9318	237.172	33.4484	31.2225	-109.237	-63.0335	141.055	0.137796	2.24818	45.0203	0.18308
673	Northeast China Plain deciduous forests	1	0	0	0	0.016	0	-9999	5.82025	1391.57	541.172	111.117	189.698	23.6339	73.2347	55.5137	25.6246	38.0282	-172.749	-128.883	189.107	0.035071	1.37314	2.53711	0.477089
674	Pannonian mixed forests	1	2	6	0	0.09	0.001	0.887556	9.8059	785.453	682.551	29.4596	236.136	25.2191	65.6158	65.1585	28.6975	43.0318	-156.64	-116.696	236.216	0.092687	2.12156	5.66612	0.251927
675	Po Basin mixed forests	2	1	4	1	0.085	0.001	0.498836	12.861	773.071	833.201	22.4353	80.9437	24.0547	71.9045	60.2895	22.7496	53.4975	-155.508	-105.625	80.6267	0.035233	1.30451	4.66547	0.195835
676	Pyrenees conifer and mixed forests	4	2	5	1	0.115	0.003	0.783185	7.87951	595.368	1089.6	18.7213	1346.65	28.2983	59.7823	138.115	32.4171	27.6891	-160.184	-97.8804	1346.17	0.6213	3.74561	44.8112	0.566436
677	Qin Ling Mountains deciduous forests	2	3	6	0	0.113	0.002	-0.264106	11.2167	824.12	767.241	74.7773	1225.04	25.4735	67.5623	126.685	24.2322	26.6982	-157.104	-101.297	1224.97	0.363644	4.13038	7.06196	0.422059
678	Rodope montane mixed forests	1	1	5	0	0.085	0.001	-0.956694	8.35684	724.916	648.13	23.969	972.397	28.0965	61.4194	120.321	34.243	29.694	-168.126	-115.247	971.819	0.355896	6.21709	9.3976	0.32884
679	Sarmatic mixed forests	1	1	5	1	0.085	0.003	0.0219177	4.83057	919.527	642.33	31.3203	138.04	31.49	54.6606	184.718	44.9633	31.7959	-134.524	-123.486	137.636	0.024281	1.35633	2.27804	0.229231
680	Sichuan Basin evergreen broadleaf forests	0	6	11	1	0.139	0.004	1.7703	17.0682	729.18	1121.61	84.5365	424.385	24.793	68.7104	99.9946	19.6217	39.4617	-177.915	-104.834	424.436	0.09279	0.955485	3.11397	0.195533
681	Southern Korea evergreen forests	1	2	4	0	0.069	0.002	0.726556	13.2311	860.041	1443.52	70.6947	157.265	26.3282	56.859	159.189	22.3698	48.7769	-164.18	-89.06	150.459	0.194611	2.21339	12.7566	0.263498
682	Taiheiyo evergreen forests	3	10	12	1	0.178	0.008	3.03904	14.2203	795.42	1857.19	50.5826	249.019	28.1596	54.2617	151.453	29.2596	51.2413	-158.402	-60.5565	243.225	0.222534	1.60185	28.1252	0.408751
683	Taiheiyo montane deciduous forests	4	7	11	1	0.16	0.006	2.98677	10.6024	827.729	1651.02	50.1397	680.398	32.0503	52.6145	225.977	38.4351	37.7428	-169.649	-72.0909	679.258	0.340439	2.11422	31.3932	0.676014
684	Tarim Basin deciduous forests and steppe	0	0	0	0	-9999	-9999	-9999	11.8143	1271.45	52.2309	90.122	1016.86	18.6348	68.9214	5.39555	11.1382	12.3951	-162.093	-9999	1016.86	0.020882	1.47187	0.569331	0.850735
685	Ussuri broadleaf and mixed forests	2	0	2	0	0.054	0.001	-0.675796	0.625238	1453.59	762.732	73.532	367.312	34.6878	53.4084	169.111	47.1112	12.4963	-157.071	-113.667	366.695	0.16308	3.77573	5.80988	0.449618
686	Western European broadleaf forests	5	2	7	1	0.13	0.005	1.42728	8.82917	641.922	866.504	19.4995	435.798	27.3183	59.1015	120.665	30.0989	40.2651	-161.112	-111.805	435.821	0.116215	1.67605	14.6809	0.350651
687	Western Siberian hemiboreal forests	0	0	2	0	0.03	0	-0.543138	0.902032	1308.15	458.486	48.2213	148.403	37.5717	58.3821	188.101	52.0608	20.8806	-150.961	-130.19	148.401	0.01876	1.63931	1.6383	0.33683
688	Zagros Mountains forest steppe	0	1	0	0	0.016	0	-9999	14.9156	912.999	377.512	87.8915	1613.5	21.878	76.3574	21.2203	19.8793	28.6729	-158.645	-106.721	1613.47	0.309091	2.20227	3.97462	0.678748
689	Alps conifer and mixed forests	4	2	7	1	0.13	0.005	0.517951	4.93163	644.733	1164.51	27.3455	1433.36	31.0851	55.7437	191.621	38.5538	32.425	-158.997	-100.072	1433	0.769005	13.0135	55.3209	1.691
690	Altai montane forest and forest steppe	0	1	2	0	0.041	0.001	-0.295436	-2.11209	1207.8	271.69	79.056	1977.16	26.6813	70.8004	85.4149	33.9399	10.8254	-160.427	-117.578	1977.1	0.282873	12.8425	6.80553	1.46096
691	Caledon conifer forests	1	0	3	0	0.051	0	0.0529443	6.40596	414.124	1730.68	29.0604	402.137	27.0025	50.2059	234.649	33.4918	30.2623	-88.9832	-68.1759	397.365	0.284479	3.49126	86.0366	0.404609
692	Carpathian montane forests	1	0	5	0	0.075	0.001	-1.07991	5.99594	750.239	823.577	41.42	749.764	30.8752	55.116	153.601	38.724	32.8177	-159.461	-110.567	749.58	0.280395	5.4291	17.6264	0.438331
693	Da Hinggan-Dzhagdy Mountains conifer forests	3	0	1	0	0.052	0.001	-0.650844	-3.34647	1620.01	504.232	104.423	621.353	33.4054	57.257	136.033	46.2232	12.7879	-151.445	-120.777	621.348	0.105559	4.9285	3.41285	0.561785
694	East Afghan montane conifer forests	0	0	0	0	-9999	-9999	-9999	10.0704	884.98	409.986	76.3864	2495.04	19.4342	76.4745	32.7878	16.4134	26.5365	-149.955	-141.5	2494.57	0.472057	6.78498	12.2964	0.799286
695	Elburz Range forest steppe	1	1	2	0	0.049	0.001	0.253719	10.573	918.639	288.548	61.7702	1870.53	21.5013	75.0229	34.3387	20.4143	28.2702	-152.791	-104.737	1870.18	0.353229	4.14703	4.84917	0.732457
696	Helanshan montane conifer forests	0	0	1	0	0.016	0	-9999	8.08165	1131.93	187.574	95.8188	1376.52	15.3953	83.0483	6.45517	5.97925	19.5512	-160.63	-9999	1376.52	0.084394	2.51999	2.31352	0.877474
697	Hengduan Mountains subalpine conifer forests	2	2	9	0	0.122	0.003	-0.266543	5.04839	585.372	713.243	88.8274	3631.98	27.8602	62.9054	136.319	35.5813	19.4978	-103.233	-100.551	3632	0.790446	2.64468	6.65898	0.534031
698	Hokkaido montane conifer forests	3	0	4	0	0.08	0.001	-0.466935	4.66648	986.438	1157.22	34.7057	398.616	32.1094	51.0369	188.874	38.7228	32.9999	-164.913	-86.3533	395.474	0.202732	2.95826	12.6357	0.289179
699	Honshu alpine conifer forests	3	2	6	0	0.095	0.002	1.29094	7.47363	910.105	1556	39.2012	926.499	35.1155	50.2563	255.536	43.2584	35.2507	-153.381	-78.8571	924.931	0.403219	2.95991	32.2255	0.97813
700	Khangai Mountains conifer forests	0	0	0	0	-9999	-9999	-9999	-5.53246	1408.44	237.964	109.797	2173.76	30.9599	65.4246	137.835	43.9851	5.71188	-155.714	-9999	2174.13	0.171207	12.1638	3.94812	1.23454
701	Mediterranean conifer and mixed forests	3	2	5	1	0.1	0.002	1.54721	13.9711	639.846	682.933	57.4786	1040.25	23.2925	71.1579	44.5714	22.4146	30.2183	-160.821	-92.9524	1037.04	0.347136	5.70097	26.0179	0.755752
702	Northeast Himalayan subalpine conifer forests	2	3	10	2	0.155	0.006	-0.464646	2.86776	625.094	708.905	88.866	3915.98	29.2348	58.9844	194.948	40.3445	6.59389	-92.0974	-90.9688	3918.31	1.11544	4.49225	29.1646	0.837037
703	Northern Anatolian conifer and deciduous forests	0	1	3	0	0.054	0.001	-0.75587	8.53275	779.942	543.419	38.7029	1321.41	26.0369	68.0261	81.0395	27.9722	29.7721	-161.018	-113.687	1321.18	0.312412	2.46341	7.46106	0.468723
704	Nujiang Langcang Gorge alpine conifer and mixed forests	0	4	12	0	0.149	0.005	0.0125115	4.58455	608.992	776.389	79.5191	3689.41	26.9945	62.5417	137.662	33.5066	16.7598	-101.729	-99.7673	3689.9	0.843762	2.88512	22.646	0.692094
705	Qilian Mountains conifer forests	1	0	0	0	0.016	0	-9999	1.05711	809.773	540.764	92.0566	3229.63	25.9935	68.8395	93.6977	29.7065	22.7377	-117.649	-105.417	3229.96	0.410858	6.32859	6.98852	0.351554
706	Qionglai-Minshan conifer forests	2	5	13	1	0.151	0.005	2.96682	7.73155	646.882	882.122	84.9826	2605.62	29.0158	61.2596	161.795	32.8903	24.1899	-121.328	-99.4956	2605.56	0.828401	4.21891	17.302	0.783805
707	Sayan montane conifer forests	2	1	3	0	0.071	0.001	-0.780277	-3.17638	1289.56	519.646	76.8757	1245.6	36.1172	55.5173	196.606	52.3541	10.4442	-157.313	-114.382	1245.6	0.205939	11.1488	9.73893	0.801933
708	Scandinavian coastal conifer forests	2	1	5	0	0.087	0.001	-0.174425	5.23159	529.341	1869.8	31.6297	224.475	28.2418	50.6682	203.333	37.2387	36.0642	-79.709	-46.5448	208.558	0.289915	4.47118	54.8329	0.357274
709	Tian Shan montane conifer forests	0	0	1	0	0.016	0	-9999	-0.232053	1072.83	418.599	57.3285	2421.16	27.0472	66.8979	95.6125	31.7	22.2853	-155.339	-122.8	2420.56	0.531641	10.2324	10.7597	1.15041
710	East Siberian taiga	2	0	1	0	0.041	0	-0.390376	-8.41981	1780.02	386.573	61.8782	456.138	34.7311	53.3468	141.782	52.7242	5.6311	-149.137	-120.331	456.141	0.072874	4.54033	3.10552	0.645013
711	Iceland boreal birch forests and alpine tundra	1	0	2	0	0.037	0	0.498714	1.49303	455.041	979.953	20.4328	448.305	24.5512	56.1739	155.212	33.3578	8.58445	-43.0951	-50.5642	443.507	0.184716	2.69289	19.0903	0.340663
712	Kamchatka taiga	0	0	0	0	-9999	-9999	-9999	-2.21232	1090.15	681.598	23.8128	350.716	33.4691	53.9509	164.876	48.6633	8.05674	-158	-101.286	350.801	0.119957	3.91421	4.64846	0.381991
713	Kamchatka-Kurile meadows and sparse forests	1	0	0	0	0.016	0	-9999	-1.68777	983.846	736.641	39.4026	282.079	33.8335	51.2839	183.281	48.7648	5.5107	-140.855	-86.4511	278.808	0.145244	3.93575	4.61906	0.354923
714	Northeast Siberian taiga	1	0	0	0	0.016	0	-9999	-12.5637	1898.96	287.525	65.1886	496.559	31.7041	53.287	167.447	44.051	6.08424	-146.256	-121.637	496.269	0.129517	5.06756	3.45468	1.15997
715	Okhotsk-Manchurian taiga	2	0	0	0	0.027	0	0.28085	-3.67374	1541.72	665.582	70.1372	501.022	35.6094	51.3408	167.225	53.8563	5.93886	-153.411	-112.346	499.447	0.186977	5.23045	5.85904	0.679432
716	Sakhalin Island taiga	2	0	0	0	0.027	0	0.51596	-1.0689	1212.93	718.725	40.9145	199.145	35.8822	50.5175	212.052	50.2789	19.3383	-131.549	-92.2291	195.253	0.109327	3.80964	4.36236	0.360466
717	Scandinavian and Russian taiga	1	1	3	0	0.051	0	1.4483	1.07489	1004.88	604.619	33.1153	180.645	33.2586	48.2834	189.092	48.6707	16.6549	-113.064	-121.589	180.415	0.038459	1.78569	3.23067	0.283138
718	Trans-Baikal conifer forests	0	0	0	0	-9999	-9999	-9999	-2.92094	1396.58	381.479	107.888	1146.7	33.323	60.1656	150.361	47.2959	10.6775	-152.174	-132	1146.71	0.136649	7.51576	4.74581	0.726496
719	Urals montane forest and taiga	1	0	3	0	0.051	0	-0.375173	-0.481959	1175.96	666.546	35.5155	386.022	37.6504	49.4319	202.343	51.6112	15.1852	-153.89	-119.804	386.009	0.078065	3.63625	4.43033	0.288381
720	West Siberian taiga	1	0	2	0	0.041	0	-0.519531	-2.54468	1383.46	523.114	43.6628	94.7519	43.9745	49.0213	283.798	61.9182	5.80213	-127.969	-122.473	94.7476	0.018119	1.65865	1.87384	0.354597
721	Alai-Western Tian Shan steppe	0	0	0	0	-9999	-9999	-9999	13.7597	1042.54	300.554	66.5621	478.146	22.7636	77.0085	17.8465	23.9391	31.8885	-156.52	-97	478.192	0.058535	2.73329	2.80609	0.353872
722	Al-Hajar foothill xeric woodlands and shrublands	0	0	2	0	0.024	0.001	1.74683	26.054	544.762	190.96	75.884	539.451	13.7842	80.2156	1.78754	12.6434	24.2235	12.8378	-9999	539.993	0.237697	1.56768	12.6824	1.57786
723	Al-Hajar montane woodlands and shrublands	0	0	0	0	-9999	-9999	-9999	19.2702	531.718	531.691	88.8613	1778.24	17.3918	79.8493	3.81838	13.3544	22.1318	-191.143	-9999	1727.92	0.747111	3.63025	51.8717	2.80647
724	Altai steppe and semi-desert	0	0	2	0	0.027	0	0.603763	2.30246	1324.25	365.053	32.6201	824.658	27.7151	70.138	73.3876	34.4034	22.2782	-146.711	-114.333	824.728	0.106408	7.12285	3.88023	0.446361
725	Central Anatolian steppe	0	0	0	0	-9999	-9999	-9999	11.3558	787.581	424.097	53.7787	936.425	22.3187	78.144	18.8356	19.9059	36.0183	-160.967	-9999	936.753	0.061574	1.59115	2.65897	0.31368
726	Daurian forest steppe	1	1	1	0	0.041	0.001	-0.261475	-1.70793	1509.87	336.733	116.488	963.874	26.9432	69.318	63.6069	36.2059	18.6795	-154.103	-131	963.883	0.084983	5.38129	2.80806	0.619244
727	Eastern Anatolian montane steppe	1	1	3	0	0.064	0.001	-0.916467	8.04036	960.992	474.105	53.3067	1810.17	24.492	72.1981	49.9999	25.2561	34.0811	-155.976	-113.292	1810.21	0.232356	4.52509	7.35442	0.485636
728	Emin Valley steppe	0	1	2	0	0.043	0	-1.02659	5.27913	1305.25	246.742	45.6888	927.23	22.7989	76.4341	30.0373	23.4314	19.3842	-151.597	-9999	927.285	0.120605	6.18581	3.48939	0.606641
729	Faroe Islands boreal grasslands	0	0	0	0	-9999	-9999	-9999	6.14986	288.115	2786.1	32.9684	192.785	33.4982	52.9423	292.064	55.3928	43.6597	-59.75	-27.625	180.129	0.235166	3.88121	52.5259	0.158981
730	Gissaro-Alai open woodlands	1	1	2	0	0.05	0	-0.166583	8.35408	950.503	503.347	58.2258	1719.27	24.5096	70.4072	57.8914	25.8516	28.8635	-155.571	-119.173	1719.5	0.509771	7.73417	15.8413	0.961663
731	Kazakh forest steppe	2	1	3	0	0.071	0.001	-0.780277	1.60641	1335.33	402.419	46.9619	249.797	33.3035	64.1865	146.079	42.6134	29.4222	-174.054	-128.769	249.804	0.034596	2.23472	1.90783	0.364856
732	Kazakh steppe	0	0	0	0	-9999	-9999	-9999	2.9159	1401.95	304.498	37.0049	254.879	28.3473	70.7079	86.2937	36.1593	24.6497	-164.751	-122.867	254.879	0.018514	1.36528	1.64218	0.366978
733	Kazakh upland steppe	0	0	1	0	0.016	0	-9999	2.01585	1335.9	293.096	40.4831	651.27	28.2144	70.4325	84.281	36.2346	19.7964	-162.942	-9999	651.244	0.04238	2.76436	1.86544	0.431636
734	Mongolian-Manchurian grassland	1	0	2	0	0.038	0.001	0.130173	1.62486	1448.7	315.62	114.998	933.241	21.8936	77.399	33.724	24.4102	22.4145	-163.409	-133.81	933.242	0.056864	2.44312	2.39794	0.696253
735	Pontic steppe	0	1	4	0	0.065	0.001	-0.725849	7.94414	1093.84	448.494	23.7987	116.643	28.198	70.6888	83.5965	33.7075	35.932	-158.58	-129.077	116.497	0.03435	1.32483	1.95707	0.320139
736	Sayan Intermontane steppe	0	1	1	0	0.03	0.001	-0.575674	-4.04176	1579.89	344.256	82.0607	1254.25	31.5008	65.426	135.345	47.6323	14.5239	-154.994	-9999	1254.4	0.198718	13.5898	8.35919	0.919766
737	Selenge-Orkhon forest steppe	0	0	0	0	-9999	-9999	-9999	-2.96359	1368.96	291.419	110.77	1669	26.7036	71.4259	87.8447	35.0546	15.4629	-161.806	-101.5	1668.98	0.141444	9.14076	4.56386	0.993541
738	South Siberian forest steppe	0	1	1	0	0.03	0.001	-0.575674	0.100571	1314.11	453.653	61.4914	372.527	34.7051	60.9765	169.736	46.6452	28.4893	-168.877	-135.019	372.53	0.050986	4.11004	3.63931	0.440141
739	Syrian xeric grasslands and shrublands	0	0	0	0	-9999	-9999	-9999	18.9325	896.251	279.22	86.9419	481.652	20.1665	79.0857	2.32006	18.1757	29.2363	-153.417	-95	481.681	0.053569	1.09044	3.2882	0.33114
740	Tian Shan foothill arid steppe	0	0	3	0	0.041	0	-0.327124	4.61137	1084	389.368	43.8758	1638.12	24.0652	72.3786	42.7488	25.2975	26.1186	-156.559	-123.371	1638.49	0.330538	6.16033	7.85471	0.678819
741	Amur meadow steppe	1	0	0	0	0.016	0	-9999	1.04794	1609	584.997	91.5471	127.114	32.0605	59.6771	109.037	40.9116	26.9384	-148.8	-121.799	127.125	0.033994	1.90325	2.15889	0.371503
742	Bohai Sea saline meadow	0	0	1	0	0.016	0	-9999	12.6426	1077	592.674	120.704	2.56359	22.1637	78.3339	74.195	18.9112	36.4863	-134.667	-105.889	2.53296	0.043559	3.12111	4.31766	0.747228
743	Nenjiang River grassland	0	0	0	0	-9999	-9999	-9999	4.40772	1496.59	427.859	119.739	144.36	23.3751	79.6848	42.2365	27.4427	37.0415	-178.896	-152.5	144.364	0.01737	1.41861	3.10742	0.814645
744	Nile Delta flooded savanna	0	0	0	0	-9999	-9999	-9999	22.1589	598.356	30.3443	52.8335	68.4098	17.1735	76.7797	20.965	17.3508	45.6497	-159.431	-171.835	68.4341	0.041115	1.07853	0.524907	0.978936
745	Saharan halophytics	0	0	0	0	-9999	-9999	-9999	22.6501	658.588	67.5287	73.2842	13.0539	11.9858	81.2277	1.70459	14.5322	7.64856	-144.616	-191.75	13.1682	0.035406	0.935137	0.702231	0.548123
746	Suiphun-Khanka meadows and forest meadows	1	0	0	0	0.016	0	-9999	3.6344	1431.43	606.706	76.5937	100.369	29.7148	61.0057	87.5337	34.4388	29.1455	-155.212	-108.519	100.361	0.037201	1.8951	2.14534	0.317212
747	Tigris-Euphrates alluvial salt marsh	0	0	0	0	-9999	-9999	-9999	24.3623	909.964	181.786	99.0109	11.096	22.3866	77.1943	9.10356	20.5244	30.8933	-80.1557	-9999	11.1006	0.016709	1.05615	1.2749	0.304332
748	Yellow Sea saline meadow	0	0	0	0	-9999	-9999	-9999	14.1282	916.286	918.902	78.1744	0.851196	24.2234	75.2563	96.5191	20.708	40.0464	-179.833	-84.2222	0.851533	0.017278	0.870893	3.54309	0.356769
749	Altai alpine meadow and tundra	0	0	2	0	0.03	0	-0.543138	-4.67929	1163.9	328.733	68.7414	2287.43	30.3989	65.3039	139.715	41.7428	13.0645	-163.235	-122.632	2287.18	0.354234	15.7163	9.57534	1.47256
750	Central Tibetan Plateau alpine steppe	0	0	0	0	-9999	-9999	-9999	-3.11397	859.857	204.302	100.398	4794.42	16.9439	80.0378	17.7124	11.2355	5.51873	-93.9891	-123.571	4794.61	0.253673	2.48423	2.84434	0.929272
751	Eastern Himalayan alpine shrub and meadows	1	2	5	0	0.096	0.003	-1.54982	0.513317	601.394	495.991	82.8258	4566.12	22.3737	67.2111	138.114	26.0478	12.3203	-76.8721	-92.4454	4564.72	0.800196	3.5395	28.5324	1.51541
752	Ghorat-Hazarajat alpine meadow	0	0	0	0	-9999	-9999	-9999	2.80059	978.37	380.685	91.5058	2971.36	22.0173	74.0793	41.6462	20.6827	27.363	-120.312	-108.333	2971.07	0.455473	8.77834	17.2329	0.584972
753	Hindu Kush alpine meadow	0	0	0	0	-9999	-9999	-9999	0.91731	850.041	795.214	78.6078	3622.55	24.3383	64.9814	115.952	27.5334	21.5885	-119.772	-98.65	3622.21	1.00301	13.1891	36.1138	1.61258
754	Karakoram-West Tibetan Plateau alpine steppe	3	1	2	0	0.066	0.002	0.545564	-3.04086	947.142	195.655	64.9762	4504.3	21.242	71.8746	68.6185	20.8121	19.1192	-103.615	-107.714	4505.36	1.03524	8.76768	13.4265	4.0731
755	Khangai Mountains alpine meadow	0	0	0	0	-9999	-9999	-9999	-5.62371	1271.23	257.395	108.53	2568.54	29.8348	68.6944	131.77	43.1547	15.7349	-145.213	-9999	2568.48	0.246628	9.8661	5.36572	1.2133
756	Kopet Dag woodlands and forest steppe	0	0	0	0	-9999	-9999	-9999	14.3381	946.837	268.369	60.4461	771.197	20.6245	78.4251	9.066	20.9999	23.1303	-151.774	-9999	771.09	0.186936	3.75073	2.67072	0.501112
757	Kuh Rud and Eastern Iran montane woodlands	0	0	0	0	-9999	-9999	-9999	15.9659	842.548	147.822	87.6691	1788.71	15.7923	78.5724	2.366	14.2126	23.4299	-164.594	-9999	1788.51	0.217543	1.78835	0.926614	0.507297
758	Mediterranean High Atlas juniper steppe	1	1	3	0	0.064	0.001	-0.916467	7.65395	731.319	418.029	42.0188	2702.48	21.6598	76.5933	29.8566	20.9752	19.9783	-147.35	-9999	2693.77	0.626977	5.83253	20.9798	0.844318
759	North Tibetan Plateau-Kunlun Mountains alpine desert	0	0	0	0	-9999	-9999	-9999	-5.48823	943.689	114.566	116.852	4683.19	20.1725	79.6119	20.0569	14.8691	4.77444	-113.508	-105	4683.43	0.324507	4.16481	2.9362	1.34051
760	Northwestern Himalayan alpine shrub and meadows	1	1	4	0	0.075	0.001	-1.14747	0.228768	863.846	543.736	53.5146	4015.86	27.0502	61.9188	156.152	30.7032	22.2042	-95.2842	-98.0673	4014.85	1.18947	7.53833	30.2239	3.04736
761	Ordos Plateau steppe	0	1	7	0	0.084	0.002	0.0652566	7.535	1105.99	356.217	98.759	1409.96	16.3748	82.1591	14.522	8.58087	26.272	-165.976	-112.667	1409.96	0.084379	2.2021	3.09855	0.629072
762	Pamir alpine desert and tundra	0	0	0	0	-9999	-9999	-9999	-2.80878	959.974	318.555	50.9031	4029.19	23.0724	71.952	51.5279	25.6917	14.9788	-121.727	-116.625	4030.01	0.847625	9.50489	28.8131	1.49802
763	Qilian Mountains subalpine meadows	0	0	0	0	-9999	-9999	-9999	-3.29666	953.992	289.363	104.357	3878.16	21.5221	76.9126	35.9302	20.0294	9.46749	-111.775	-101	3878.08	0.309066	5.90163	6.0195	0.796467
764	Sayan alpine meadows and tundra	2	1	2	0	0.061	0.001	-0.598425	-5.87578	1262.08	435.875	92.2046	1888.9	34.3247	57.2266	194.034	51.5651	8.04873	-144.218	-116.652	1888.79	0.307441	12.6184	11.0122	1.18196
765	Southeast Tibet shrublands and meadows	1	2	5	0	0.065	0.001	2.19858	-0.231272	743.122	598.693	92.8536	4080.56	25.0165	67.0459	100.685	29.2665	16.8914	-95.5308	-101.22	4080.3	0.519047	3.27329	5.82534	0.408266
766	Sulaiman Range alpine meadows	0	0	0	0	-9999	-9999	-9999	13.1396	833.832	361.528	77.395	2210.36	18.8947	76.3039	31.957	13.9789	26.0894	-162.298	-81	2208.02	0.395387	4.00849	7.85892	0.511296
767	Tian Shan montane steppe and meadows	0	1	4	0	0.065	0.001	-1.15076	-1.48663	1071.42	308.206	70.5905	2741.9	25.2117	71.4831	78.034	28.8214	19.5333	-149.726	-118.093	2741.55	0.547264	10.417	8.35894	1.15109
768	Tibetan Plateau alpine shrublands and meadows	0	0	0	0	-9999	-9999	-9999	-2.93436	824.532	422.09	105.453	4566.07	20.4718	74.1503	46.084	20.5103	10.8151	-90.0359	-92.7692	4566.05	0.281329	2.63522	4.91118	0.351063
769	Western Himalayan alpine shrub and meadows	1	0	3	0	0.05	0	-0.17244	-0.544373	707.758	625.33	84.9089	4631.82	21.4286	69.6377	128.422	22.1643	17.6446	-80.1728	-99	4629.29	0.828109	4.17405	30.0351	2.65669
770	Yarlung Zanbo arid steppe	0	0	5	0	0.051	0.001	1.02011	1.86223	646.285	322.11	102.332	4539.22	15.3883	75.3261	55.6359	11.0466	18.0368	-75.2263	-104.3	4540.55	0.549291	2.41411	10.0482	0.923244
771	Cherskii-Kolyma mountain tundra	0	0	0	0	-9999	-9999	-9999	-13.898	1858.77	315.631	70.179	859.689	30.8957	54.0694	181.31	42.6276	2.74793	-149.179	-121.816	859.544	0.199416	7.04633	5.49865	1.62927
772	Chukchi Peninsula tundra	0	0	0	0	-9999	-9999	-9999	-10.8969	1353.84	331.14	44.9752	364.744	33.0329	57.3169	174.151	48.2881	4.03616	-105.838	-110.184	362.315	0.129543	4.57034	4.66663	1.09705
773	Kamchatka tundra	2	0	0	0	0.027	0	0.51596	-3.32794	1027.6	685.453	32.8155	554.525	33.0847	51.3631	176.305	47.3593	2.62999	-151.717	-89.3275	552.513	0.2454	4.50484	7.58085	0.491145
774	Kola Peninsula tundra	1	0	0	0	0.016	0	-9999	-0.996263	820.387	501.122	31.4886	205.959	27.4686	50.2555	155.011	39.7413	9.95183	-91.6667	-123	202.767	0.057302	2.18157	2.99144	0.347645
775	Northeast Siberian coastal tundra	0	0	0	0	-9999	-9999	-9999	-14.3193	1713.05	192.913	57.4415	31.2776	34.6587	60.3873	157.868	55.1206	4.99518	-124.536	-9999	31.0817	0.022212	1.96252	1.46621	0.681161
776	Northwest Russian-Novaya Zemlya tundra	1	0	1	0	0.03	0	-0.648587	-5.12198	1060.59	463.182	31.1741	147.14	35.6551	53.1872	167.092	59.6899	4.5081	-102.952	-123.395	145.087	0.049537	2.4136	2.74592	0.386233
777	Novosibirsk Islands Arctic desert	0	0	0	0	-9999	-9999	-9999	-15.6198	1354.97	145.062	60.8165	36.493	37.9104	65.8279	148.003	67.3688	4.61585	-121.675	-9999	35.8486	0.043471	3.32565	0.457068	0.262396
778	Russian Arctic desert	0	0	0	0	-9999	-9999	-9999	-11.7939	887.3	327.996	29.5812	342.188	34.8484	65.1349	157.847	65.2192	4.52663	-69.4825	-62.4706	331.393	0.180436	6.98469	5.59968	0.310438
779	Russian Bering tundra	0	0	0	0	-9999	-9999	-9999	-8.22954	1376.08	400.029	41.2315	323.613	33.917	51.6467	168.246	48.2994	1.81403	-145.341	-119.991	322.637	0.144378	3.38508	4.58417	0.754445
780	Scandinavian Montane Birch forest and grasslands	2	1	5	0	0.087	0.001	-0.174425	-0.060536	727.438	978.088	29.8701	699.649	27.7085	52.2197	178.914	36.4195	15.8082	-103.449	-72.9116	687.817	0.290351	5.59989	26.1184	0.588535
781	Taimyr-Central Siberian tundra	0	0	0	0	-9999	-9999	-9999	-13.8756	1561.84	302.164	39.9869	216.17	34.1345	59.4859	164.213	55.9053	3.09749	-149.697	-118.286	214.87	0.056093	2.8138	2.52348	0.535235
782	Trans-Baikal Bald Mountain tundra	1	0	0	0	0.016	0	-9999	-8.10593	1625.74	534.482	84.4811	1176.61	33.0419	50.3671	154.405	51.2267	3.12514	-154.308	-111.215	1176.52	0.216543	9.82647	8.01119	1.0124
783	Wrangel Island Arctic desert	0	0	0	0	-9999	-9999	-9999	-12.2164	1159.46	148.777	56.0539	159.423	38.2576	64.3351	235.867	64.1664	4.93956	-91.8305	-9999	157.35	0.110093	6.37758	3.05911	1.36563
784	Yamal-Gydan tundra	0	0	0	0	-9999	-9999	-9999	-9.28275	1392.93	363.301	34.7366	36.1426	44.6917	57.506	308.475	63.3921	2.02951	-128.34	-131.64	35.914	0.016249	1.0185	1.61899	0.382659
785	Aegean and Western Turkey sclerophyllous and mixed forests	3	2	5	0	0.101	0.005	0.553956	14.9669	689.459	651.398	61.1442	342.137	23.8366	70.9432	60.7395	24.317	39.6746	-161.028	-102.567	334.658	0.263858	2.64016	8.79809	0.631929
786	Anatolian conifer and deciduous mixed forests	1	1	2	0	0.043	0.001	1.79752	11.8958	722.384	611.637	53.5487	830.439	23.7095	69.9872	54.3322	23.6534	34.136	-170.81	-114.216	828.034	0.21212	1.80118	6.82729	0.452807
787	Canary Islands dry woodlands and forests	3	3	5	0	0.103	0.004	1.70534	16.8886	307.046	329.307	78.4257	745.966	26.7183	72.1999	51.2469	36.4458	50.2338	-137.688	-9999	720.104	0.565022	10.1142	15.5742	0.873966
788	Corsican montane broadleaf and mixed forests	2	1	5	1	0.086	0.001	1.69606	11.2695	565.835	833.488	45.5339	942.011	25.268	62.3593	122.902	28.2828	22.6475	-170.5	-92	940.407	0.660622	2.03888	25.04	0.366175
789	Crete Mediterranean forests	1	1	4	0	0.077	0.005	-1.0096	16.1811	569.168	721.858	84.8869	507.866	24.3629	71.9206	63.7645	24.5084	36.4494	-167.633	-96.7857	494.658	0.414311	2.96583	32.3264	0.470413
790	Cyprus Mediterranean forests	1	1	0	0	0.03	0	-0.661182	18.0465	651.051	486.083	91.1515	300.807	22.4828	75.8159	27.4326	23.0409	43.2128	-132.969	-98.7143	295.643	0.223159	4.04596	15.9617	0.605041
791	Eastern Mediterranean conifer-broadleaf forests	2	1	4	0	0.067	0.001	1.80717	17.5446	815.34	539.803	85.1685	535.209	24.4413	75.4427	25.4086	25.7235	35.5784	-160.323	-109.318	534.063	0.12901	2.21196	7.27998	0.351443
792	Iberian conifer forests	5	2	6	2	0.128	0.003	1.44397	10.7027	678.211	529.261	36.1582	1228.65	21.6664	72.0388	47.7502	20.4516	30.0102	-163.758	-122.414	1228.2	0.24102	2.09447	17.5373	0.425459
793	Iberian sclerophyllous and semi-deciduous forests	5	2	6	3	0.128	0.003	1.67207	14.0138	648.876	506.168	42.9562	637.047	20.4356	72.055	31.7291	16.2584	39.324	-160.812	-111.363	637.015	0.12808	2.15356	6.66996	0.305558
794	Illyrian deciduous forests	1	1	4	0	0.065	0.001	0.925482	13.3006	665.204	1128.58	38.4126	388.678	26.7007	68.8764	85.0714	27.2305	40.5081	-158.389	-90.1355	382.568	0.346311	3.97106	17.0012	0.769966
795	Italian sclerophyllous and semi-deciduous forests	4	2	7	2	0.128	0.005	1.21084	13.258	648.451	775.029	30.0441	365.535	25.7575	71.1757	63.0225	26.3697	43.8074	-157.156	-98.3475	363.638	0.216034	2.50596	17.95	0.500848
796	Mediterranean Acacia-Argania dry woodlands and succulent thickets	2	1	2	0	0.056	0.002	0.744922	18.2589	481.207	242.162	72.0561	573.259	17.8556	78.9947	2.83896	14.4896	26.5617	-171.432	-68	572.14	0.131883	2.74572	3.8359	0.715174
797	Mediterranean dry woodlands and steppe	0	0	0	0	-9999	-9999	-9999	17.1246	735.04	225.899	47.9026	842.064	13.922	79.936	1.63923	12.3024	20.6387	-170.131	-180.5	841.36	0.079695	1.4841	2.73276	0.409976
798	Mediterranean woodlands and forests	5	2	4	0	0.111	0.004	0.0441475	16.3731	633.7	442.729	57.2203	685.958	20.5829	76.4897	16.5894	18.197	31.6524	-167.571	-90.2595	683.966	0.166238	3.25453	8.74336	0.476597
799	Northeast Spain and Southern France Mediterranean forests	8	5	6	1	0.168	0.014	0.363762	13.0744	598.858	717.677	31.2228	422.895	23.6543	70.1068	61.2329	22.8649	41.3385	-147.686	-99.4976	419.754	0.224897	2.65511	13.8976	0.440104
800	Northwest Iberian montane forests	5	2	6	1	0.127	0.003	0.762707	11.2268	585.841	843.842	41.2064	898.967	21.7815	64.7526	66.8739	19.786	32.7443	-165.969	-98.4706	898.895	0.213175	2.60413	19.525	0.316432
801	Pindus Mountains mixed forests	3	1	5	0	0.092	0.003	0.199036	10.2995	684.216	868.108	34.4711	969.59	26.7771	66.1981	103.86	29.5607	30.8542	-164.182	-101.157	969.09	0.481936	5.75625	12.3739	0.666039
802	South Apennine mixed montane forests	2	1	4	0	0.085	0.001	-1.08121	11.7229	604.675	740.707	46.2454	921.614	26.843	65.8398	94.9429	28.6113	35.0415	-164.961	-96.1613	920.664	0.451966	2.81612	8.97684	0.567959
803	Southeast Iberian shrubs and woodlands	1	2	3	0	0.071	0.001	-0.303543	17.3726	575.498	272.746	49.2108	187.891	20.2632	78.7145	11.7036	17.3166	50.4976	-140.667	-9999	181.943	0.145496	4.19303	6.27617	0.469704
804	Southern Anatolian montane conifer and deciduous forests	0	1	0	0	0.016	0	-9999	11.2677	756.444	640.958	66.4405	1306.52	23.7248	69.3853	71.4228	23.7315	31.0075	-162.796	-101.194	1305.75	0.480747	3.31009	10.5987	0.895586
805	Southwest Iberian Mediterranean sclerophyllous and mixed forests	3	2	6	0	0.097	0.003	1.804	16.4959	495.724	665.325	64.3292	172.717	21.1312	66.8115	42.5788	18.9145	42.6842	-146.726	-97.0325	171.716	0.085769	2.65608	7.16914	0.240643
806	Tyrrhenian-Adriatic sclerophyllous and mixed forests	4	3	6	1	0.105	0.002	3.19707	15.5017	583.539	649.613	52.7775	305.579	24.0953	70.7918	57.7896	23.8405	47.0142	-133.508	-97.475	296.787	0.236289	2.55183	10.7458	0.420686
807	Afghan Mountains semi-desert	0	0	0	0	-9999	-9999	-9999	3.84149	914.59	424.516	87.1115	2897.61	21.7173	73.4473	43.6992	20.9356	26.2371	-113.083	-152	2897.96	0.592925	10.169	23.9212	0.779096
808	Alashan Plateau semi-desert	0	1	0	0	0.016	0	-9999	6.7403	1250.7	96.3301	99.3291	1360.77	15.8744	79.4023	1.75442	8.99032	9.0594	-160.655	-106	1360.81	0.051464	2.24921	1.31914	1.21078
809	Arabian desert	0	1	1	0	0.03	0	-0.585336	25.6879	723.255	118.896	94.9147	700.083	6.93393	80.0684	0.149078	10.6129	17.9277	-84.7418	-9999	699.988	0.035098	0.734009	0.786385	0.425344
810	Arabian sand desert	0	0	0	0	-9999	-9999	-9999	27.5831	665.662	83.8721	103.291	394.896	4.19869	80.7141	0.017398	11.4825	10.1501	180.772	-9999	394.892	0.029446	0.601871	0.464347	0.445033
811	Arabian-Persian Gulf coastal plain desert	0	0	0	0	-9999	-9999	-9999	26.8055	703.332	84.7314	100.406	98.166	7.59926	79.8755	0.272869	11.6194	21.9818	58.1085	-9999	97.9507	0.020683	0.76179	0.695476	0.448271
812	Azerbaijan shrub desert and steppe	1	1	1	0	0.03	0	2.96615	13.7063	863.953	415.572	37.8477	276.229	24.0035	76.5839	39.0946	23.3628	34.9661	-155.061	-120.333	276.297	0.087679	2.83451	5.13919	0.556034
813	Badghyz and Karabil semi-desert	0	0	0	0	-9999	-9999	-9999	16.2942	995.125	262.295	94.8166	544.356	21.116	77.7181	8.12327	29.8023	26.8042	-160.965	-9999	544.397	0.087481	2.17063	1.96035	0.307944
814	Baluchistan xeric woodlands	2	1	3	0	0.071	0.002	0.22206	20.5036	781.163	315.735	80.8131	1120.65	16.8223	79.2889	21.7468	11.6319	26.8927	-148.521	-93.2025	1120.75	0.252228	3.55503	7.357	0.803656
815	Caspian lowland desert	0	0	0	0	-9999	-9999	-9999	10.0546	1206.73	195.575	22.8899	-12.9486	24.6914	78.1605	40.4367	27.7411	13.4306	-156.131	-111	-12.9429	0.015676	1.15171	1.53181	0.563418
816	Central Afghan Mountains xeric woodlands	0	1	0	0	0.016	0	-9999	10.1781	985.517	270.199	101.768	2057.77	18.772	78.0656	10.7325	16.9518	25.8413	-157.641	-107.714	2057.85	0.32848	5.46868	6.79525	0.512544
817	Central Asian northern desert	0	0	0	0	-9999	-9999	-9999	9.48386	1311.8	170.921	38.1433	252.714	22.0057	80.1653	10.3807	21.4775	11.525	-151.721	-121.833	252.719	0.023146	1.34841	1.40436	0.512721
818	Central Asian riparian woodlands	0	0	0	0	-9999	-9999	-9999	10.885	1251.34	142.194	47.76	149.295	23.212	79.3006	22.1241	23.6389	24.1968	-157.577	-9999	149.307	0.023529	2.5657	1.90996	0.687536
819	Central Asian southern desert	0	0	0	0	-9999	-9999	-9999	14.6634	1151.99	136.932	62.8569	164.325	19.4904	78.4547	3.64721	22.5661	16.1546	-146.936	-9999	164.323	0.02275	1.21285	0.918581	0.404855
820	Central Persian desert basins	0	0	0	0	-9999	-9999	-9999	17.7455	920.793	171.976	85.8725	1196.45	14.9126	78.1888	1.66532	13.8894	18.4944	-163.256	-85.1667	1196.51	0.105122	1.37889	1.02144	0.351671
821	East Arabian fog shrublands and sand desert	0	0	0	0	-9999	-9999	-9999	27.3621	398.413	116.416	56.4716	138.973	7.12513	80.7241	0.473827	11.7346	8.12559	314	-9999	138.744	0.03629	1.17701	1.28465	0.580769
822	East Sahara Desert	0	0	0	0	-9999	-9999	-9999	22.8986	686.173	7.2387	36.3278	446.493	4.33929	79.4745	0.027885	12.6128	1.97287	-178.017	-148.794	446.496	0.03331	0.617124	0.185681	0.742159
823	East Saharan montane xeric woodlands	0	0	1	0	0.016	0	-9999	23.788	446.802	133.756	150.135	1068.65	7.39977	78.4936	8.97418	9.89617	4.4705	-169.241	-96.5	1068.27	0.074044	0.814551	1.37202	0.75216
824	Eastern Gobi desert steppe	0	0	0	0	-9999	-9999	-9999	3.73371	1389.85	150.732	112.208	1218.06	16.8711	80.8832	5.86727	10.8961	10.5821	-165.033	-9999	1218.05	0.03826	1.80288	1.56928	1.07733
825	Gobi Lakes Valley desert steppe	0	1	0	0	0.016	0	-9999	1.28034	1334.52	140.324	110.441	1733.48	17.4326	81.1156	7.50983	14.6824	9.29005	-164.047	-9999	1733.5	0.08239	4.30235	2.0982	1.31331
826	Great Lakes Basin desert steppe	0	0	1	0	0.016	0	-9999	-1.54067	1558.22	164.517	96.2707	1488.25	24.142	78.8008	42.0581	36.3603	9.45415	-165.196	-9999	1488.3	0.094389	7.25326	3.12421	1.26591
827	Junggar Basin semi-desert	1	1	3	0	0.065	0.001	-1.26319	5.65499	1434.81	157.281	53.78	837.073	20.7154	80.0815	17.5004	22.4693	13.9187	-156.076	-9999	837.107	0.067187	4.50448	2.00385	0.802141
828	Kazakh semi-desert	0	0	0	0	-9999	-9999	-9999	5.57559	1420.63	201.194	22.7733	305.134	24.2333	76.3477	32.3063	27.0201	9.96976	-154.736	-9999	305.134	0.023407	1.35742	1.36013	0.492973
829	Kopet Dag semi-desert	0	0	0	0	-9999	-9999	-9999	16.7487	955.43	218.549	55.9058	98.0624	19.7116	79.9509	10.4616	16.1881	20.109	-130.688	-126.5	98.2269	0.04025	1.71155	1.65201	0.439135
830	Mesopotamian shrub desert	0	1	0	0	0.016	0	-9999	20.4483	887.309	159.405	82.3755	411.324	15.7256	79.2962	0.820708	13.6953	25.0624	-159.813	-140	411.32	0.028897	0.920186	1.43009	0.294431
831	North Arabian desert	0	0	0	0	-9999	-9999	-9999	22.0793	876.622	87.6616	79.9768	521.344	10.9355	79.9877	0.575715	12.6375	15.1243	-151.229	-9999	521.348	0.025844	0.660957	0.707888	0.358256
832	North Arabian highland shrublands	0	0	0	0	-9999	-9999	-9999	22.078	824.834	156.78	87.5203	1118.87	12.5336	79.8224	0.054552	12.0081	13.2112	-170.533	-9999	1118.16	0.091005	0.743996	1.44351	0.521227
833	North Saharan Xeric Steppe and Woodland	0	1	0	0	0.016	0	-9999	21.2292	679.839	53.8782	60.105	380.234	6.79702	80.9277	0.199985	11.453	7.09096	-167.585	-170.05	380.193	0.03951	0.834824	0.640688	0.641729
834	Paropamisus xeric woodlands	0	0	0	0	-9999	-9999	-9999	9.70747	954.034	390.286	89.5022	1863.49	22.3588	75.4564	30.8438	23.2058	29.2424	-145.707	-110.875	1863.62	0.42561	7.95993	11.8874	0.554776
835	Qaidam Basin semi-desert	0	0	1	0	0.016	0	-9999	0.64799	1002.81	89.9979	97.1476	3340.02	15.015	81.1219	6.23387	9.30948	6.23606	-117.875	-118	3340	0.154051	3.17886	2.74166	1.31405
836	Red Sea coastal desert	0	0	0	0	-9999	-9999	-9999	23.9601	509.591	19.2353	64.7103	360.784	13.911	79.9312	0.290126	15.6581	13.0944	-49.7158	-166.407	359.265	0.133272	1.67136	0.941538	1.56924
837	Red Sea-Arabian Desert shrublands	0	0	0	0	-9999	-9999	-9999	24.8539	568.35	97.1919	78.1582	905.59	14.4219	80.2675	0.625225	16.9454	20.2981	-84.6026	-144.692	905.157	0.138386	1.52059	1.81179	0.916483
838	Registan-North Pakistan sandy desert	0	0	0	0	-9999	-9999	-9999	21.239	924.276	91.3537	96.882	878.246	11.8075	80.3736	0.246852	11.5189	16.5499	-143.935	-9999	878.273	0.079824	1.35874	0.570657	0.359922
839	Saharan Atlantic coastal desert	0	0	0	0	-9999	-9999	-9999	22.8321	266.111	39.1724	93.0621	41.9488	8.04252	81.1778	1.72109	10.2643	10.2284	-133.097	-9999	41.8671	0.027342	1.322	0.64844	1.07061
840	South Arabian plains and plateau desert	0	0	0	0	-9999	-9999	-9999	26.6965	484.648	92.9061	73.888	504.43	6.60914	81.2925	0.114592	12.7788	9.08865	65.7149	-9999	504.261	0.063087	1.01653	1.14135	0.553993
841	South Iran Nubo-Sindian desert and semi-desert	0	0	0	0	-9999	-9999	-9999	24.2416	695.451	201.858	88.0241	562.294	14.642	80.1061	1.02257	12.2916	24.2781	-26.0457	-9999	560.295	0.137378	1.56193	3.94401	0.875069
842	South Sahara desert	0	0	0	0	-9999	-9999	-9999	26.4677	637.656	25.6094	92.3011	420.616	4.36942	79.5418	0.023177	12.1227	2.5455	-17.0915	-115.722	420.62	0.029761	0.662424	0.302452	0.824286
843	Taklimakan desert	0	0	0	0	-9999	-9999	-9999	10.1623	1223.1	51.6648	82.7314	1267.75	17.7989	74.7637	4.03167	11.092	10.9347	-157.674	-101.815	1267.81	0.094721	2.67274	1.0731	1.16706
844	Tibesti-Jebel Uweinat montane xeric woodlands	0	0	0	0	-9999	-9999	-9999	22.0397	619.236	44.2866	78.0583	1326.53	12.9636	78.6799	0.45377	15.5641	0.451832	-167.015	-119.304	1326.48	0.206377	1.22581	1.94265	1.57703
845	West Sahara desert	0	0	0	0	-9999	-9999	-9999	24.1913	862.717	22.3559	51.0647	395.458	4.76029	80.9337	0.022886	11.6122	3.15804	-133.207	-9999	395.457	0.036309	0.71007	0.344743	0.757644
846	West Saharan montane xeric woodlands	0	0	0	0	-9999	-9999	-9999	23.4892	706.109	41.1764	54.6733	1060.88	9.04373	79.7201	0.041938	11.0486	2.18533	-159.61	-152.931	1060.74	0.106549	0.916762	1.06395	1.07513
		0	0	0	0	-9999	-9999	-9999	-9999	-9999	-9999	-9999	-9999	-9999	-9999	-9999	-9999	-9999	-9999	-9999	-9999	-9999	-9999	-9999	-9999

## Sheet: S4
Supplementary Data 4. Biogeographic realm associated with each taxon
Taxon	Afrotropic	Australasia	Indomalayan	Nearctic	Neotropic	Oceania	Palearctic
Asplenium_abscissum	0	0	0	1	1	0	0
Asplenium_actiniopteroides	1	0	0	0	0	0	0
Asplenium_acuminatum	0	0	0	0	1	1	0
Asplenium_adiantum-nigrum	1	0	1	1	1	1	1
Asplenium_adulterinum	0	0	0	1	0	0	1
Asplenium_aegaeum	0	0	0	0	0	0	1
Asplenium_aethiopicum	1	1	1	0	0	1	1
Asplenium_affine	1	1	1	0	1	1	1
Asplenium_alatum	0	0	0	0	1	0	0
Asplenium_altajense	0	0	0	0	0	0	1
Asplenium_amboinense	0	1	1	0	0	1	0
Asplenium_anceps	0	0	0	0	0	0	1
Asplenium_angustum	0	0	0	0	1	0	0
Asplenium_anisophyllum	1	0	0	0	0	0	0
Asplenium_anogrammoides	0	0	1	0	0	0	1
Asplenium_antiquum	0	0	1	0	0	0	1
Asplenium_antrophyoides	0	0	1	0	0	0	1
Asplenium_appendiculatum	0	1	0	0	1	0	0
Asplenium_aran-tohanum	0	0	0	0	0	0	1
Asplenium_athertonense	0	1	0	0	0	0	0
Asplenium_attenuatum	0	1	0	0	0	0	0
Asplenium_aureum	0	0	0	0	0	0	1
Asplenium_auriculatum	0	0	0	1	1	0	0
Asplenium_auritum	1	0	0	1	1	0	0
Asplenium_australasicum	0	1	0	0	0	1	0
Asplenium_austrochinense	0	0	1	0	0	0	1
Asplenium_azoricum	0	0	0	0	0	0	1
Asplenium_baileyanum	0	1	0	0	0	0	0
Asplenium_balearicum	0	0	0	0	0	0	1
Asplenium_bangii	0	0	0	0	1	0	0
Asplenium_barteri	1	0	0	0	0	0	0
Asplenium_bicentenniale	0	1	0	0	0	0	0
Asplenium_bipartitum	1	0	0	0	0	0	0
Asplenium_bipinnatifidum	0	1	0	0	0	1	0
Asplenium_blastophorum	1	0	0	0	0	0	0
Asplenium_boltonii	1	0	0	0	0	0	0
Asplenium_boreale	0	0	1	0	0	0	1
Asplenium_bourgaei	0	0	0	0	0	0	1
Asplenium_bulbiferum	0	1	0	0	0	0	0
Asplenium_bullatum	0	0	1	0	0	0	1
Asplenium_capillipes	0	0	1	0	0	0	1
Asplenium_capitisyork	0	1	0	0	0	0	0
Asplenium_carnarvonense	0	1	0	0	0	0	0
Asplenium_carruthersii	0	1	0	0	0	1	0
Asplenium_castaneoviride	0	0	0	0	0	0	1
Asplenium_castaneum	0	0	0	1	1	0	0
Asplenium_caudatum	0	1	1	0	0	1	0
Asplenium_celtibericum	0	0	0	0	0	0	1
Asplenium_ceterach	1	0	0	0	0	0	1
Asplenium_chathamense	0	1	0	0	0	0	0
Asplenium_christii	1	0	0	0	0	0	0
Asplenium_ciliatum	0	0	0	0	1	0	0
Asplenium_cimmeriorum	0	1	0	0	0	0	0
Asplenium_cirrhatum	0	0	0	0	1	0	0
Asplenium_claussenii	0	0	0	0	1	0	0
Asplenium_coenobiale	0	0	1	0	0	0	1
Asplenium_confusum	0	0	1	0	0	0	0
Asplenium_contiguum	0	0	0	0	0	1	0
Asplenium_cordatum	1	0	0	0	0	0	0
Asplenium_cornutissimum	0	0	1	0	0	0	0
Asplenium_correardii	1	0	0	0	0	0	0
Asplenium_crinicaule	0	0	1	0	0	0	1
Asplenium_cristatum	0	0	0	1	1	0	0
Asplenium_cuneatiforme	0	0	1	0	0	0	0
Asplenium_cuneatum	1	1	1	0	1	1	0
Asplenium_cuneifolium	0	0	0	0	0	0	1
Asplenium_currorii	1	0	0	0	0	0	0
Asplenium_cuspidatum	0	0	0	1	1	0	0
Asplenium_cymbifolium	0	1	1	0	0	0	0
Asplenium_dalhousiae	0	0	1	0	0	0	1
Asplenium_dareoides	0	0	0	0	1	0	0
Asplenium_daucifolium	1	0	0	0	0	0	0
Asplenium_delavayi	0	0	1	0	0	0	1
Asplenium_dielfalcatum	0	0	0	0	0	1	0
Asplenium_dielpallidum	0	0	0	0	0	0	1
Asplenium_difforme	0	1	0	0	0	0	0
Asplenium_dimorphum	0	1	0	0	0	0	0
Asplenium_dissectum	0	0	0	0	1	0	0
Asplenium_dognyense	0	1	0	0	0	0	0
Asplenium_dregeanum	1	0	0	0	0	0	0
Asplenium_elliottii	1	0	0	0	0	0	0
Asplenium_elmeri	0	0	1	0	0	0	0
Asplenium_emarginatum	1	0	0	0	0	0	0
Asplenium_ensiforme	0	0	1	0	0	0	1
Asplenium_erectum	1	0	1	0	0	0	0
Asplenium_erosum	1	0	0	1	1	0	0
Asplenium_excelsum	0	0	0	0	1	0	0
Asplenium_exiguum	0	1	1	1	1	0	1
Asplenium_falcatum	1	1	1	0	0	1	0
Asplenium_feei	0	0	0	0	1	0	0
Asplenium_fibrillosum	0	0	0	1	1	0	0
Asplenium_filidens	0	1	0	0	0	0	0
Asplenium_finlaysonianum	0	0	1	0	0	0	1
Asplenium_fissum	0	0	0	0	0	0	1
Asplenium_flabellifolium	0	1	0	0	0	0	0
Asplenium_flabellulatum	0	0	0	0	1	0	0
Asplenium_flaccidum	0	1	0	0	0	1	0
Asplenium_fontanum	0	0	0	0	0	0	1
Asplenium_foreziense	0	0	0	0	0	0	1
Asplenium_formosae	0	0	1	0	0	0	1
Asplenium_formosum	1	0	1	1	1	0	0
Asplenium_fragrans	0	0	0	1	1	0	0
Asplenium_gemmiferum	1	0	0	0	0	0	0
Asplenium_gibberosum	0	1	0	0	0	1	0
Asplenium_goudeyi	0	1	0	0	0	0	0
Asplenium_griffithianum	0	0	1	0	0	0	1
Asplenium_gueinzianum	1	0	0	0	0	0	0
Asplenium_hainanense	0	0	1	0	0	0	1
Asplenium_haleakalense	0	0	0	0	0	1	0
Asplenium_hallbergii	0	0	0	1	1	0	0
Asplenium_hallii	0	0	0	0	1	0	0
Asplenium_harmanii	0	1	0	0	0	0	0
Asplenium_harpeodes	0	0	0	0	1	0	0
Asplenium_hastatum	0	0	0	1	1	0	0
Asplenium_haurakiense	0	1	0	0	0	1	0
Asplenium_hemionitis	0	0	0	0	0	0	1
Asplenium_hemitomum	1	0	0	0	0	0	0
Asplenium_heterochroum	0	0	0	1	1	0	0
Asplenium_heteroresiliens	0	0	0	1	0	0	0
Asplenium_hispanicum	0	0	0	0	0	0	1
Asplenium_hobdyi	0	0	0	0	0	1	0
Asplenium_holophlebium	0	0	0	0	1	0	0
Asplenium_holosorum	0	0	1	0	0	0	1
Asplenium_horridum	0	1	1	0	0	1	0
Asplenium_hostmannii	0	0	0	0	1	0	0
Asplenium_humbertii	0	0	1	0	0	0	1
Asplenium_hybridum	0	0	0	0	0	0	1
Asplenium_incisum	0	0	1	0	0	0	1
Asplenium_insiticium	0	1	0	0	1	1	0
Asplenium_interjectum	0	0	1	0	0	0	1
Asplenium_jahandiezii	0	0	0	0	0	0	1
Asplenium_juglandifolium	0	0	0	0	1	0	0
Asplenium_kaulfussii	0	0	0	0	0	1	0
Asplenium_keysserianum	0	1	0	0	0	0	0
Asplenium_kiangsuense	0	0	1	0	0	0	1
Asplenium_kinabaluense	0	1	1	0	0	0	0
Asplenium_kitazawae	0	0	0	0	0	0	1
Asplenium_laciniatum	1	0	1	0	0	0	1
Asplenium_lamprocaulon	0	0	0	0	1	0	0
Asplenium_lamprophyllum	0	1	0	0	0	0	0
Asplenium_laserpitiifolium	0	1	1	0	0	1	0
Asplenium_lepidotum	0	1	0	0	0	0	0
Asplenium_lepturus	0	0	1	0	0	0	0
Asplenium_lessinense	0	0	0	0	0	0	1
Asplenium_linckii	1	0	0	0	0	0	0
Asplenium_listeri	0	1	0	0	0	0	0
Asplenium_lividum	1	0	0	0	0	0	0
Asplenium_lobulatum	0	1	1	0	0	1	0
Asplenium_lolegnamense	0	0	0	0	0	0	1
Asplenium_loxoscaphoides	1	0	0	0	0	0	0
Asplenium_lunulatum	1	0	0	0	0	0	0
Asplenium_macraei	0	0	0	0	0	1	0
Asplenium_maguanense	0	0	1	0	0	0	0
Asplenium_mannii	1	0	0	0	0	0	0
Asplenium_marattioides	0	1	0	0	0	1	0
Asplenium_marinum	0	0	0	0	0	0	1
Asplenium_mauritiensis	1	0	0	0	0	0	0
Asplenium_micantifrons	0	0	0	0	0	1	0
Asplenium_micropaleatum	0	0	0	0	1	0	0
Asplenium_milnei	0	1	0	0	0	0	0
Asplenium_monanthes	1	0	0	1	1	1	1
Asplenium_montanum	0	0	0	1	0	0	0
Asplenium_musifolium	0	1	1	0	0	1	0
Asplenium_myriophyllum	0	0	0	1	1	0	0
Asplenium_neolaserpitifolium	0	0	1	0	0	0	1
Asplenium_nidiforme	0	1	0	0	0	0	0
Asplenium_nidus	0	1	1	0	0	1	1
Asplenium_nigrescens	0	1	1	0	0	0	0
Asplenium_nigripes	0	0	0	1	1	0	0
Asplenium_nitens	1	0	0	0	0	0	0
Asplenium_nitidum	0	0	1	0	0	0	0
Asplenium_normale	1	1	1	0	0	1	1
Asplenium_novoguineense	0	1	0	0	0	0	0
Asplenium_oblongifolium	0	1	0	0	0	1	0
Asplenium_obovatum	0	0	0	0	0	0	1
Asplenium_obtusatum	0	1	0	0	1	1	0
Asplenium_oldhamii	0	0	1	0	0	0	1
Asplenium_oligolepidum	0	1	0	0	0	0	0
Asplenium_oligophlebium	0	0	1	0	0	0	1
Asplenium_onopteris	0	0	0	0	0	0	1
Asplenium_pachychlamys	0	0	1	0	0	0	0
Asplenium_paleaceum	0	1	0	0	0	0	0
Asplenium_palmeri	0	0	0	1	1	0	0
Asplenium_paucivenosum	0	0	1	0	0	0	1
Asplenium_pauperequitum	0	0	0	0	0	1	0
Asplenium_pearcei	0	0	0	0	1	0	0
Asplenium_pellucidum	1	1	1	0	0	1	0
Asplenium_peruvianum	0	0	0	0	1	1	0
Asplenium_petiolulatum	1	0	0	0	0	0	0
Asplenium_petrarchae	0	0	0	0	0	0	1
Asplenium_phillipsianum	1	0	0	0	0	0	0
Asplenium_phyllitidis	0	1	1	0	0	0	1
Asplenium_pifongiae	0	0	1	0	0	0	0
Asplenium_platyneuron	1	0	0	1	0	0	0
Asplenium_pleurosorum	0	1	0	0	0	0	0
Asplenium_polyodon	0	1	1	0	0	1	0
Asplenium_polyphyllum	0	0	0	0	1	0	0
Asplenium_praegracile	1	0	0	0	0	0	0
Asplenium_praemorsum	0	0	0	1	1	1	1
Asplenium_preussii	1	0	0	0	0	0	0
Asplenium_prolongatum	0	0	1	0	0	0	1
Asplenium_protensum	1	0	0	0	0	0	0
Asplenium_protomajoricum	0	0	0	0	0	0	1
Asplenium_pseuderectum	0	0	0	0	1	0	0
Asplenium_pseudolaserpitiifolium	0	0	1	0	0	0	1
Asplenium_pteridoides	0	1	0	0	0	0	0
Asplenium_pteropus	0	0	0	0	1	0	0
Asplenium_pulcherrimum	0	0	1	0	0	0	1
Asplenium_pumilum	0	0	0	1	1	0	0
Asplenium_quaylei	0	0	0	0	0	1	0
Asplenium_radicans	0	0	0	0	1	0	0
Asplenium_resiliens	0	0	0	1	1	0	0
Asplenium_rhizophyllum	0	0	0	1	0	0	0
Asplenium_richardii	0	1	0	0	0	0	0
Asplenium_ritoense	0	0	1	0	0	1	1
Asplenium_ruprechtii	0	0	1	0	0	0	1
Asplenium_rutaceum	0	0	0	0	1	0	0
Asplenium_ruta-muraria	0	0	1	1	0	0	1
Asplenium_rutifolium	1	0	0	0	0	0	0
Asplenium_sagittatum	0	0	0	0	0	0	1
Asplenium_salicifolium	0	0	0	0	1	0	0
Asplenium_sampsonii	0	0	1	0	0	0	0
Asplenium_sancti-christofori	0	1	0	0	0	0	0
Asplenium_sandersonii	1	0	0	0	0	0	0
Asplenium_sarelii	0	0	1	0	0	0	1
Asplenium_saxicola	0	1	1	0	0	0	1
Asplenium_scalare	0	0	1	0	0	0	0
Asplenium_scandens	0	1	1	0	0	0	0
Asplenium_schizophyllum	0	0	0	0	1	1	0
Asplenium_scleroprium	0	1	0	0	0	0	0
Asplenium_scolopendrium	0	1	1	1	1	0	1
Asplenium_scortechinii	0	0	1	0	0	0	0
Asplenium_seelosii	0	0	0	0	0	0	1
Asplenium_septentrionale	0	0	1	1	0	0	1
Asplenium_serra	0	0	0	1	1	0	0
Asplenium_serratum	0	0	0	0	1	0	0
Asplenium_serricula	0	0	1	0	0	0	0
Asplenium_sessilifolium	0	0	0	1	1	0	0
Asplenium_setisectum	0	1	1	0	0	0	0
Asplenium_setoi	0	0	1	0	0	1	0
Asplenium_shikokianum	0	0	1	0	0	0	1
Asplenium_shimurae	0	0	0	0	0	0	1
Asplenium_shuttleworthianum	0	0	0	0	0	1	0
Asplenium_simii	1	0	0	0	0	0	0
Asplenium_simplicifrons	0	1	0	0	0	0	0
Asplenium_smedsii	1	0	0	0	0	0	0
Asplenium_soleirolioides	0	0	0	1	1	0	0
Asplenium_speluncae	0	0	1	0	0	0	1
Asplenium_sphenotomum	0	0	0	0	0	1	0
Asplenium_splendens	1	0	0	0	0	0	0
Asplenium_stenolobum	0	0	0	0	0	1	0
Asplenium_stoloniferum	1	0	0	0	0	0	0
Asplenium_stuebelianum	0	0	0	0	1	0	0
Asplenium_subcrenatum	0	0	1	0	0	0	0
Asplenium_subemarginatum	0	1	0	0	0	0	0
Asplenium_subflexuosum	0	1	0	0	0	0	0
Asplenium_subglandulosum	0	1	0	0	0	0	0
Asplenium_sublaserpitiifolium	0	0	1	0	0	0	0
Asplenium_sulcatum	1	0	0	0	0	0	0
Asplenium_surrogatum	0	1	0	0	0	0	0
Asplenium_tenerrimum	0	0	0	0	1	0	0
Asplenium_tenerum	0	1	1	0	0	1	0
Asplenium_tenuifolium	0	1	1	0	0	0	1
Asplenium_theciferum	1	0	0	0	1	0	0
Asplenium_thunbergii	1	1	1	0	0	0	0
Asplenium_trapezoideum	0	0	1	0	0	0	1
Asplenium_tricholepis	0	0	0	0	1	0	0
Asplenium_trichomanes	1	1	1	1	1	1	1
Asplenium_trigonopterum	0	0	0	0	0	1	0
Asplenium_triphyllum	0	0	0	0	1	0	0
Asplenium_tripteropus	0	0	1	0	0	0	1
Asplenium_uniseriale	0	0	0	0	1	0	0
Asplenium_variabile	1	0	0	0	0	0	0
Asplenium_vespertinum	0	0	0	1	0	0	0
Asplenium_vieillardii	0	1	0	0	0	0	0
Asplenium_viride	0	0	1	1	0	0	1
Asplenium_vittaeforme	0	1	1	0	0	0	0
Asplenium_volkensii	1	0	0	0	0	0	0
Asplenium_vulcanicum	0	1	1	0	0	0	0
Asplenium_wilfordii	0	0	1	0	0	0	1
Asplenium_wrightii	0	0	1	0	0	0	1
Asplenium_yoshinagae	0	0	1	0	0	0	1
